# Supplementary material for: JMJD6 cleaves MePCE to release positive transcription elongation factor b (P-TEFb) in higher eukaryotes
Source: eLife. 2020 Feb 12;9:e53930. doi: 10.7554/eLife.53930 (PMC7064345; doi:10.7554/eLife.53930)
Supplement: Supplementary file 2. — Bacteria expressed and purified JMJD6 are subjected to mass spectrum analysis, all potential contaminated trace protein candidates are listed. No known protease candidate is identified from the list. [file elife-53930-supp2.xlsx]

## Sheet: Samples Report for 201812 JMJD 
#	Identified Proteins	Accession Number	Alternate ID	Molecular Wt	WT-1	WT-2	Mut-1	Mut-2	Mut-3
1	Bifunctional arginine demethylase and lysyl-hydroxylase JMJD6 OS=Homo sapiens GN=JMJD6 PE=1 SV=1	JMJD6_HUMAN	JMJD6	46 kDa	1583	1081	1038	679	1487
2	60 kDa chaperonin 1 OS=Escherichia coli O1:K1 / APEC GN=groL1 PE=3 SV=1	CH601_ECOK1 (+19)	groL1	57 kDa	302	245	93	352	452
3	Trigger factor OS=Escherichia coli O127:H6 (strain E2348/69 / EPEC) GN=tig PE=3 SV=1	TIG_ECO27 (+13)	tig	48 kDa	149	57	12	11	8
4	Bifunctional polymyxin resistance protein ArnA OS=Escherichia coli (strain K12 / MC4100 / BW2952) GN=arnA PE=3 SV=1	ARNA_ECOBW (+3)	arnA	74 kDa	2			76	129
5	Triosephosphate isomerase OS=Escherichia coli O139:H28 (strain E24377A / ETEC) GN=tpiA PE=3 SV=1	TPIS_ECO24 (+16)	tpiA	27 kDa			62	27	98
6	cAMP-activated global transcriptional regulator CRP OS=Escherichia coli O157:H7 GN=crp PE=3 SV=1	CRP_ECO57 (+2)	crp	24 kDa			48	36	46
7	30S ribosomal protein S3 OS=Escherichia coli O139:H28 (strain E24377A / ETEC) GN=rpsC PE=3 SV=1	RS3_ECO24 (+19)	rpsC	26 kDa	18	34	24	4	13
8	FKBP-type peptidyl-prolyl cis-trans isomerase SlyD OS=Escherichia coli O157:H7 GN=slyD PE=3 SV=1	SLYD_ECO57 (+2)	slyD	21 kDa	3		13	62	38
9	Protein-export protein SecB OS=Escherichia coli O139:H28 (strain E24377A / ETEC) GN=secB PE=3 SV=1	SECB_ECO24 (+12)	secB	17 kDa	49	25	16	6	8
10	Pyruvate dehydrogenase E1 component OS=Escherichia coli O157:H7 GN=aceE PE=1 SV=2	ODP1_ECO57 (+1)	aceE	100 kDa			25	5	66
11	Dihydrolipoyl dehydrogenase OS=Escherichia coli O157:H7 GN=lpdA PE=3 SV=2	DLDH_ECO57 (+2)	lpdA	51 kDa	16		13		53
12	GTP cyclohydrolase 1 OS=Escherichia coli O139:H28 (strain E24377A / ETEC) GN=folE PE=3 SV=1	GCH1_ECO24 (+20)	folE	25 kDa			16	19	25
13	Glutamate--tRNA ligase OS=Escherichia coli O139:H28 (strain E24377A / ETEC) GN=gltX PE=3 SV=1	SYE_ECO24 (+5)	gltX	54 kDa			46	8	15
14	Chaperone protein HtpG OS=Escherichia coli O157:H7 GN=htpG PE=3 SV=1	HTPG_ECO57 (+5)	htpG	71 kDa	2		16		48
15	Alkyl hydroperoxide reductase subunit F OS=Escherichia coli (strain K12) GN=ahpF PE=1 SV=2	AHPF_ECOLI	ahpF	56 kDa			30	5	36
16	50S ribosomal protein L13 OS=Escherichia coli O139:H28 (strain E24377A / ETEC) GN=rplM PE=3 SV=1	RL13_ECO24 (+20)	rplM	16 kDa			4	3	47
17	50S ribosomal protein L2 OS=Escherichia coli O139:H28 (strain E24377A / ETEC) GN=rplB PE=3 SV=1	RL2_ECO24 (+20)	rplB	30 kDa		3	5	10	24
18	Chaperone protein Skp OS=Escherichia coli O157:H7 GN=skp PE=3 SV=1	SKP_ECO57 (+2)	skp	18 kDa	26	16	8	7
19	Ferric uptake regulation protein OS=Escherichia coli O157:H7 GN=fur PE=3 SV=1	FUR_ECO57 (+2)	fur	17 kDa			12	8	30
20	S-ribosylhomocysteine lyase OS=Escherichia coli O139:H28 (strain E24377A / ETEC) GN=luxS PE=3 SV=1	LUXS_ECO24 (+17)	luxS	19 kDa			10	30	6
21	Adenylyl-sulfate kinase OS=Escherichia coli O139:H28 (strain E24377A / ETEC) GN=cysC PE=3 SV=1	CYSC_ECO24 (+12)	cysC	22 kDa			11	14	33
22	Chloramphenicol acetyltransferase OS=Escherichia coli GN=cat PE=1 SV=1	CAT_ECOLX	cat	26 kDa	12		19	3	7
23	P-protein OS=Escherichia coli O157:H7 GN=pheA PE=3 SV=1	PHEA_ECO57 (+1)	pheA	43 kDa			8	9	26
24	Ribosomal small subunit pseudouridine synthase A OS=Escherichia coli O157:H7 GN=rsuA PE=3 SV=1	RSUA_ECO57 (+2)	rsuA	26 kDa			14	18	17
25	Histidine biosynthesis bifunctional protein HisB OS=Escherichia coli (strain K12) GN=hisB PE=1 SV=1	HIS7_ECOLI	hisB	40 kDa			6	6	18
26	Beta-lactamase TEM OS=Escherichia coli GN=bla PE=1 SV=1	BLAT_ECOLX	bla	32 kDa	20	3	16
27	Elongation factor Tu 1 OS=Escherichia coli O139:H28 (strain E24377A / ETEC) GN=tuf1 PE=3 SV=1	EFTU1_ECO24 (+14)	tuf1	43 kDa	20		9	3	11
28	30S ribosomal protein S10 OS=Escherichia coli O139:H28 (strain E24377A / ETEC) GN=rpsJ PE=3 SV=1	RS10_ECO24 (+20)	rpsJ	12 kDa	15		7	1	12
29	Acetylornithine deacetylase OS=Escherichia coli O139:H28 (strain E24377A / ETEC) GN=argE PE=3 SV=1	ARGE_ECO24 (+12)	argE	42 kDa			6	10	11
30	Guanosine-5'-triphosphate,3'-diphosphate pyrophosphatase OS=Escherichia coli O139:H28 (strain E24377A / ETEC) GN=gppA PE=3 SV=1	GPPA_ECO24 (+2)	gppA	55 kDa			7	5	23
31	Catalase-peroxidase 1 OS=Escherichia coli O157:H7 GN=katG1 PE=3 SV=1	KATG1_ECO57 (+5)	katG1	80 kDa			1		28
32	30S ribosomal protein S15 OS=Escherichia coli O139:H28 (strain E24377A / ETEC) GN=rpsO PE=3 SV=1	RS15_ECO24 (+18)	rpsO	10 kDa				4	6
33	Ribonucleoside-diphosphate reductase 1 subunit alpha OS=Escherichia coli (strain K12) GN=nrdA PE=1 SV=2	RIR1_ECOLI	nrdA	86 kDa			20		13
34	Soluble pyridine nucleotide transhydrogenase OS=Escherichia coli O139:H28 (strain E24377A / ETEC) GN=sthA PE=3 SV=1	STHA_ECO24 (+13)	sthA	52 kDa			11	4	15
35	Cysteine desulfurase IscS OS=Escherichia coli O139:H28 (strain E24377A / ETEC) GN=iscS PE=3 SV=1	ISCS_ECO24 (+18)	iscS	45 kDa			20	2	4
36	Glutathione S-transferase GstA OS=Escherichia coli O157:H7 GN=gstA PE=3 SV=1	GSTA_ECO57 (+1)	gstA	23 kDa	12	21
37	7SK snRNA methylphosphate capping enzyme OS=Homo sapiens GN=MEPCE PE=1 SV=1	MEPCE_HUMAN (+1)	MEPCE	74 kDa		22
38	FKBP-type 22 kDa peptidyl-prolyl cis-trans isomerase OS=Escherichia coli (strain K12) GN=fklB PE=1 SV=2	FKBB_ECOLI	fklB	22 kDa	12	6	8		3
39	Thermoresistant gluconokinase OS=Escherichia coli (strain K12) GN=gntK PE=1 SV=4	GNTK_ECOLI	gntK	20 kDa			11	4	17
40	30S ribosomal protein S14 OS=Escherichia coli O139:H28 (strain E24377A / ETEC) GN=rpsN PE=3 SV=1	RS14_ECO24 (+15)	rpsN	12 kDa	2	1	5	2	12
41	30S ribosomal protein S2 OS=Escherichia coli O127:H6 (strain E2348/69 / EPEC) GN=rpsB PE=3 SV=1	RS2_ECO27 (+15)	rpsB	27 kDa	2	1	16		8
42	Dihydrolipoyllysine-residue succinyltransferase component of 2-oxoglutarate dehydrogenase complex OS=Escherichia coli O157:H7 GN=sucB PE=1 SV=2	ODO2_ECO57 (+1)	sucB	44 kDa	8				12
43	Erythronate-4-phosphate dehydrogenase OS=Escherichia coli (strain ATCC 8739 / DSM 1576 / Crooks) GN=pdxB PE=3 SV=1	PDXB_ECOLC	pdxB	41 kDa			17		4
44	Uncharacterized protein YbbN OS=Escherichia coli (strain K12) GN=ybbN PE=1 SV=2	YBBN_ECOLI	ybbN	32 kDa	15	1	1		6
45	FKBP-type peptidyl-prolyl cis-trans isomerase FkpA OS=Escherichia coli O157:H7 GN=fkpA PE=3 SV=1	FKBA_ECO57 (+2)	fkpA	29 kDa	23	2
46	Universal stress protein UP12 OS=Escherichia coli (strain K12) GN=uspG PE=1 SV=2	USPG_ECOLI	uspG	16 kDa			8	2	19
47	Ribosomal RNA small subunit methyltransferase I OS=Escherichia coli O157:H7 GN=rsmI PE=3 SV=1	RSMI_ECO57 (+1)	rsmI	31 kDa			12		12
48	Polyribonucleotide nucleotidyltransferase OS=Escherichia coli O139:H28 (strain E24377A / ETEC) GN=pnp PE=3 SV=1	PNP_ECO24 (+19)	pnp	77 kDa	13				4
49	30S ribosomal protein S12 OS=Escherichia coli O139:H28 (strain E24377A / ETEC) GN=rpsL PE=3 SV=1	RS12_ECO24 (+18)	rpsL	14 kDa	3		2	4	7
50	30S ribosomal protein S13 OS=Escherichia coli O157:H7 GN=rpsM PE=3 SV=2	RS13_ECO57 (+5)	rpsM	13 kDa	6		4		5
51	30S ribosomal protein S5 OS=Escherichia coli O139:H28 (strain E24377A / ETEC) GN=rpsE PE=3 SV=1	RS5_ECO24 (+8)	rpsE	18 kDa	7	7	2		2
52	Regulator of sigma D OS=Escherichia coli O139:H28 (strain E24377A / ETEC) GN=rsd PE=3 SV=1	RSD_ECO24 (+20)	rsd	18 kDa			4	9	11
53	Chaperone protein DnaJ OS=Escherichia coli O139:H28 (strain E24377A / ETEC) GN=dnaJ PE=3 SV=1	DNAJ_ECO24 (+15)	dnaJ	41 kDa	11				3
54	GPI inositol-deacylase OS=Homo sapiens GN=PGAP1 PE=1 SV=1	PGAP1_HUMAN	PGAP1	105 kDa		4
55	Chaperone protein ClpB OS=Escherichia coli O157:H7 GN=clpB PE=3 SV=1	CLPB_ECO57 (+2)	clpB	96 kDa	4		13
56	30S ribosomal protein S4 OS=Escherichia coli O139:H28 (strain E24377A / ETEC) GN=rpsD PE=3 SV=1	RS4_ECO24 (+20)	rpsD	23 kDa	2		5	5	8
57	Diaminopimelate decarboxylase OS=Escherichia coli (strain K12) GN=lysA PE=1 SV=1	DCDA_ECOLI (+1)	lysA	46 kDa			4	9	7
58	50S ribosomal protein L1 OS=Escherichia coli O139:H28 (strain E24377A / ETEC) GN=rplA PE=3 SV=1	RL1_ECO24 (+19)	rplA	25 kDa	9	3	7
59	RNA-binding protein Hfq OS=Escherichia coli O139:H28 (strain E24377A / ETEC) GN=hfq PE=3 SV=1	HFQ_ECO24 (+20)	hfq	11 kDa			1	11	4
60	Glutamine--fructose-6-phosphate aminotransferase [isomerizing] OS=Escherichia coli O157:H7 GN=glmS PE=3 SV=3	GLMS_ECO57 (+2)	glmS	67 kDa				10	9
61	50S ribosomal protein L5 OS=Escherichia coli O139:H28 (strain E24377A / ETEC) GN=rplE PE=3 SV=1	RL5_ECO24 (+20)	rplE	20 kDa	12		1		3
62	Spermidine N(1)-acetyltransferase OS=Escherichia coli O157:H7 GN=speG PE=3 SV=2	ATDA_ECO57 (+1)	speG	22 kDa			4	2	12
63	GMP synthase [glutamine-hydrolyzing] OS=Escherichia coli O139:H28 (strain E24377A / ETEC) GN=guaA PE=3 SV=1	GUAA_ECO24 (+20)	guaA	59 kDa			7		11
64	Phosphopentomutase OS=Escherichia coli O139:H28 (strain E24377A / ETEC) GN=deoB PE=3 SV=1	DEOB_ECO24 (+19)	deoB	44 kDa			7		5
65	UDP-N-acetylmuramoyl-L-alanyl-D-glutamate--2,6-diaminopimelate ligase OS=Escherichia coli (strain K12) GN=murE PE=1 SV=2	MURE_ECOLI	murE	53 kDa			12		1
66	33 kDa chaperonin OS=Escherichia coli O127:H6 (strain E2348/69 / EPEC) GN=hslO PE=3 SV=1	HSLO_ECO27 (+12)	hslO	33 kDa	4		6		5
67	Protein GrpE OS=Escherichia coli O139:H28 (strain E24377A / ETEC) GN=grpE PE=3 SV=1	GRPE_ECO24 (+16)	grpE	22 kDa	11	3			3
68	Desmoglein-1 OS=Homo sapiens GN=DSG1 PE=1 SV=2	DSG1_HUMAN	DSG1	114 kDa		7	6
69	PTS system galactitol-specific EIIA component OS=Escherichia coli O157:H7 GN=gatA PE=3 SV=1	PTKA_ECO57 (+2)	gatA	17 kDa	17
70	Acyl carrier protein OS=Escherichia coli O139:H28 (strain E24377A / ETEC) GN=acpP PE=3 SV=1	ACP_ECO24 (+17)	acpP	9 kDa	8		1	4	3
71	ATP-dependent RNA helicase RhlE OS=Escherichia coli (strain K12) GN=rhlE PE=1 SV=3	RHLE_ECOLI	rhlE	50 kDa			12		2
72	Uncharacterized tRNA/rRNA methyltransferase LasT OS=Escherichia coli (strain K12) GN=lasT PE=3 SV=2	LAST_ECOLI	lasT	25 kDa			8		2
73	Transcriptional regulator YqjI OS=Escherichia coli (strain K12) GN=yqjI PE=1 SV=1	YQJI_ECOLI	yqjI	23 kDa			3	5	6
74	Serum albumin OS=Homo sapiens GN=ALB PE=1 SV=2	ALBU_HUMAN (+4)	ALB	69 kDa		2	5	1
75	Dihydrolipoyllysine-residue acetyltransferase component of pyruvate dehydrogenase complex OS=Escherichia coli (strain K12) GN=aceF PE=1 SV=3	ODP2_ECOLI	aceF	66 kDa	11	1
76	Glutathionyl-hydroquinone reductase YqjG OS=Escherichia coli (strain K12) GN=yqjG PE=1 SV=1	YQJG_ECOLI	yqjG	37 kDa			2		9
77	Tyrosine recombinase XerD OS=Escherichia coli O157:H7 GN=xerD PE=3 SV=1	XERD_ECO57 (+2)	xerD	34 kDa			4	5	4
78	Keratin, type II cytoskeletal 6A OS=Homo sapiens GN=KRT6A PE=1 SV=3	K2C6A_HUMAN (+4)	KRT6A	60 kDa		8	2		2
79	Keratinocyte proline-rich protein OS=Homo sapiens GN=KPRP PE=1 SV=1	KPRP_HUMAN	KPRP	64 kDa		4	7
80	Carbonic anhydrase 2 OS=Escherichia coli (strain K12) GN=can PE=1 SV=1	CAN_ECOLI	can	25 kDa			10		1
81	Uncharacterized HTH-type transcriptional regulator YeiE OS=Escherichia coli O157:H7 GN=yeiE PE=4 SV=1	YEIE_ECO57 (+2)	yeiE	33 kDa			2	2	8
82	UPF0304 protein YfbU OS=Escherichia coli O139:H28 (strain E24377A / ETEC) GN=yfbU PE=3 SV=1	YFBU_ECO24 (+17)	yfbU	20 kDa			5
83	Glycerol dehydrogenase OS=Escherichia coli O6:H1 (strain CFT073 / ATCC 700928 / UPEC) GN=gldA PE=3 SV=1	GLDA_ECOL6 (+1)	gldA	39 kDa				4	10
84	Dihydrofolate synthase/folylpolyglutamate synthase OS=Escherichia coli (strain K12) GN=folC PE=1 SV=2	FOLC_ECOLI	folC	45 kDa			11
85	UDP-N-acetylmuramate--L-alanine ligase OS=Escherichia coli O139:H28 (strain E24377A / ETEC) GN=murC PE=3 SV=1	MURC_ECO24 (+17)	murC	54 kDa			6
86	50S ribosomal protein L15 OS=Escherichia coli O139:H28 (strain E24377A / ETEC) GN=rplO PE=3 SV=1	RL15_ECO24 (+15)	rplO	15 kDa	5			2	3
87	30S ribosomal protein S11 OS=Escherichia coli O139:H28 (strain E24377A / ETEC) GN=rpsK PE=3 SV=1	RS11_ECO24 (+20)	rpsK	14 kDa	1		2		2
88	NADH pyrophosphatase OS=Escherichia coli O139:H28 (strain E24377A / ETEC) GN=nudC PE=3 SV=1	NUDC_ECO24 (+10)	nudC	30 kDa			1	3	6
89	ATP synthase subunit beta OS=Escherichia coli O139:H28 (strain E24377A / ETEC) GN=atpD PE=3 SV=1	ATPB_ECO24 (+20)	atpD	50 kDa	10
90	Uncharacterized protein YbiB OS=Escherichia coli (strain K12) GN=ybiB PE=1 SV=1	YBIB_ECOLI	ybiB	35 kDa			9
91	60 kDa chaperonin 2 OS=Escherichia coli O1:K1 / APEC GN=groL2 PE=3 SV=1	CH602_ECOK1	groL2	57 kDa	2			3	1
92	30S ribosomal protein S21 OS=Escherichia coli O139:H28 (strain E24377A / ETEC) GN=rpsU PE=3 SV=1	RS21_ECO24 (+19)	rpsU	9 kDa			4		2
93	L-asparaginase 1 OS=Escherichia coli O157:H7 GN=ansA PE=3 SV=1	ASPG1_ECO57 (+1)	ansA	37 kDa					5
94	Iron-sulfur cluster insertion protein ErpA OS=Escherichia coli O139:H28 (strain E24377A / ETEC) GN=erpA PE=3 SV=1	ERPA_ECO24 (+20)	erpA	12 kDa	4	4
95	3-hydroxyacyl-[acyl-carrier-protein] dehydratase FabZ OS=Escherichia coli O139:H28 (strain E24377A / ETEC) GN=fabZ PE=3 SV=1	FABZ_ECO24 (+18)	fabZ	17 kDa			6
96	Collagen alpha-2(I) chain OS=Homo sapiens GN=COL1A2 PE=1 SV=7	CO1A2_HUMAN (+2)	COL1A2	129 kDa			6	4
97	50S ribosomal protein L3 OS=Escherichia coli O139:H28 (strain E24377A / ETEC) GN=rplC PE=3 SV=1	RL3_ECO24 (+20)	rplC	22 kDa	4		3
98	Dermcidin OS=Homo sapiens GN=DCD PE=1 SV=2	DCD_HUMAN	DCD	11 kDa		5	6
99	Right origin-binding protein OS=Escherichia coli O157:H7 GN=rob PE=3 SV=1	ROB_ECO57 (+1)	rob	33 kDa			3		5
100	Filaggrin-2 OS=Homo sapiens GN=FLG2 PE=1 SV=1	FILA2_HUMAN	FLG2	248 kDa		5	5
101	Threonine--tRNA ligase OS=Escherichia coli O127:H6 (strain E2348/69 / EPEC) GN=thrS PE=3 SV=1	SYT_ECO27 (+14)	thrS	74 kDa			1		8
102	Glucokinase OS=Escherichia coli O139:H28 (strain E24377A / ETEC) GN=glk PE=3 SV=1	GLK_ECO24 (+11)	glk	35 kDa			10		1
103	ATP synthase subunit alpha OS=Escherichia coli O139:H28 (strain E24377A / ETEC) GN=atpA PE=3 SV=1	ATPA_ECO24 (+19)	atpA	55 kDa	9
104	Cysteine synthase A OS=Escherichia coli O157:H7 GN=cysK PE=3 SV=2	CYSK_ECO57 (+1)	cysK	34 kDa			9
105	High frequency lysogenization protein HflD OS=Escherichia coli O139:H28 (strain E24377A / ETEC) GN=hflD PE=3 SV=1	HFLD_ECO24 (+17)	hflD	23 kDa					11
106	Bacterial non-heme ferritin OS=Escherichia coli O157:H7 GN=ftnA PE=3 SV=1	FTNA_ECO57 (+2)	ftnA	19 kDa	4				3
107	Hydroxyethylthiazole kinase OS=Escherichia coli (strain 55989 / EAEC) GN=thiM PE=3 SV=1	THIM_ECO55 (+7)	thiM	27 kDa			4		5
108	UDP-N-acetylmuramate--L-alanyl-gamma-D-glutamyl-meso-2,6-diaminoheptandioate ligase OS=Escherichia coli (strain K12) GN=mpl PE=1 SV=3	MPL_ECOLI	mpl	50 kDa			3		2
109	Nickel-responsive regulator OS=Escherichia coli O139:H28 (strain E24377A / ETEC) GN=nikR PE=3 SV=1	NIKR_ECO24 (+18)	nikR	15 kDa					7
110	N-methyl-L-tryptophan oxidase OS=Escherichia coli (strain K12 / MC4100 / BW2952) GN=solA PE=3 SV=1	MTOX_ECOBW (+3)	solA	41 kDa			6
111	30S ribosomal protein S7 OS=Escherichia coli O139:H28 (strain E24377A / ETEC) GN=rpsG PE=3 SV=1	RS7_ECO24 (+20)	rpsG	18 kDa	9
112	Uncharacterized oxidoreductase YhhX OS=Escherichia coli (strain K12) GN=yhhX PE=1 SV=1	YHHX_ECOLI	yhhX	39 kDa			7
113	Coenzyme A biosynthesis bifunctional protein CoaBC OS=Escherichia coli O6:H1 (strain CFT073 / ATCC 700928 / UPEC) GN=coaBC PE=3 SV=2	COABC_ECOL6 (+1)	coaBC	43 kDa				2	6
114	Catalase HPII OS=Escherichia coli (strain K12) GN=katE PE=1 SV=1	CATE_ECOLI	katE	84 kDa					6
115	Stringent starvation protein B OS=Escherichia coli O157:H7 GN=sspB PE=3 SV=1	SSPB_ECO57 (+1)	sspB	18 kDa	5		1
116	Hornerin OS=Homo sapiens GN=HRNR PE=1 SV=2	HORN_HUMAN	HRNR	282 kDa			5		1
117	Alkyl hydroperoxide reductase C OS=Escherichia coli O157:H7 GN=ahpC PE=3 SV=2	AHPC_ECO57 (+2)	ahpC	21 kDa	3				2
118	Citrate synthase OS=Escherichia coli O6:H1 (strain CFT073 / ATCC 700928 / UPEC) GN=gltA PE=3 SV=1	CISY_ECOL6 (+1)	gltA	48 kDa	3				4
119	Outer membrane protein A OS=Escherichia coli O157:H7 GN=ompA PE=3 SV=1	OMPA_ECO57 (+1)	ompA	37 kDa	7
120	Phospho-2-dehydro-3-deoxyheptonate aldolase, Phe-sensitive OS=Escherichia coli O157:H7 GN=aroG PE=3 SV=1	AROG_ECO57 (+1)	aroG	38 kDa			8
121	Lysine--tRNA ligase OS=Escherichia coli O157:H7 GN=lysS PE=3 SV=3	SYK1_ECO57 (+2)	lysS	58 kDa			3
122	Transcriptional repressor MprA OS=Escherichia coli O157:H7 GN=mprA PE=3 SV=1	MPRA_ECO57 (+2)	mprA	21 kDa			4
123	Thiol peroxidase OS=Escherichia coli O157:H7 GN=tpx PE=3 SV=2	TPX_ECO57 (+2)	tpx	18 kDa				4
124	Luciferase-like monooxygenase OS=Escherichia coli O6:H1 (strain CFT073 / ATCC 700928 / UPEC) GN=yhbW PE=4 SV=1	YHBW_ECOL6 (+1)	yhbW	37 kDa			5
125	30S ribosomal protein S1 OS=Escherichia coli O157:H7 GN=rpsA PE=3 SV=1	RS1_ECO57 (+2)	rpsA	61 kDa	5
126	NADH-quinone oxidoreductase subunit C/D OS=Escherichia coli O6:K15:H31 (strain 536 / UPEC) GN=nuoC PE=3 SV=1	NUOCD_ECOL5	nuoC	68 kDa	4
127	UPF0509 protein YciZ OS=Escherichia coli O127:H6 (strain E2348/69 / EPEC) GN=yciZ PE=3 SV=1	YCIZ_ECO27 (+10)	yciZ	6 kDa					5
128	Uncharacterized protease YegQ OS=Escherichia coli (strain K12) GN=yegQ PE=3 SV=1	YEGQ_ECOLI	yegQ	51 kDa			1		2
129	Protein translocase subunit SecA OS=Escherichia coli O139:H28 (strain E24377A / ETEC) GN=secA PE=3 SV=1	SECA_ECO24 (+20)	secA	102 kDa	3				2
130	Protein S100-A8 OS=Homo sapiens GN=S100A8 PE=1 SV=1	S10A8_HUMAN	S100A8	11 kDa		2	2
131	50S ribosomal protein L35 OS=Escherichia coli O45:K1 (strain S88 / ExPEC) GN=rpmI PE=3 SV=1	RL35_ECO45 (+16)	rpmI	7 kDa				3
132	Transcription termination/antitermination protein NusG OS=Escherichia coli O157:H7 GN=nusG PE=1 SV=2	NUSG_ECO57 (+2)	nusG	21 kDa			3
133	Uncharacterized protein YiiD OS=Escherichia coli O157:H7 GN=yiiD PE=4 SV=1	YIID_ECO57 (+2)	yiiD	37 kDa	4
134	ATP-dependent Clp protease ATP-binding subunit ClpA OS=Escherichia coli O157:H7 GN=clpA PE=3 SV=1	CLPA_ECO57 (+2)	clpA	84 kDa			6
135	50S ribosomal protein L10 OS=Escherichia coli O139:H28 (strain E24377A / ETEC) GN=rplJ PE=3 SV=1	RL10_ECO24 (+20)	rplJ	18 kDa	6
136	50S ribosomal protein L4 OS=Escherichia coli O139:H28 (strain E24377A / ETEC) GN=rplD PE=3 SV=1	RL4_ECO24 (+20)	rplD	22 kDa	6
137	Succinate dehydrogenase flavoprotein subunit OS=Escherichia coli O157:H7 GN=sdhA PE=3 SV=1	SDHA_ECO57 (+2)	sdhA	64 kDa	6
138	Glyoxylate/hydroxypyruvate reductase B OS=Escherichia coli O139:H28 (strain E24377A / ETEC) GN=ghrB PE=3 SV=1	GHRB_ECO24 (+20)	ghrB	35 kDa			3
139	Carbamoyl-phosphate synthase small chain OS=Escherichia coli O157:H7 GN=carA PE=3 SV=1	CARA_ECO57 (+2)	carA	41 kDa			1		1
140	Outer membrane protein F OS=Escherichia coli (strain K12) GN=ompF PE=1 SV=1	OMPF_ECOLI	ompF	39 kDa	2
141	50S ribosomal protein L28 OS=Escherichia coli O139:H28 (strain E24377A / ETEC) GN=rpmB PE=3 SV=1	RL28_ECO24 (+19)	rpmB	9 kDa				2	3
142	Arabinose 5-phosphate isomerase KdsD OS=Escherichia coli O157:H7 GN=kdsD PE=3 SV=1	KDSD_ECO57 (+2)	kdsD	35 kDa			2
143	Skin-specific protein 32 OS=Homo sapiens GN=XP32 PE=1 SV=1	XP32_HUMAN	XP32	26 kDa		1
144	50S ribosomal protein L7/L12 OS=Escherichia coli O139:H28 (strain E24377A / ETEC) GN=rplL PE=3 SV=1	RL7_ECO24 (+19)	rplL	12 kDa	4
145	50S ribosomal protein L14 OS=Escherichia coli O139:H28 (strain E24377A / ETEC) GN=rplN PE=3 SV=1	RL14_ECO24 (+20)	rplN	14 kDa				2
146	Acid stress protein IbaG OS=Escherichia coli O6:H1 (strain CFT073 / ATCC 700928 / UPEC) GN=ibaG PE=3 SV=1	IBAG_ECOL6 (+1)	ibaG	9 kDa					2
147	Aconitate hydratase B OS=Escherichia coli (strain K12) GN=acnB PE=1 SV=3	ACNB_ECOLI	acnB	94 kDa	4
148	Cytochrome bd-I ubiquinol oxidase subunit 1 OS=Escherichia coli O6:H1 (strain CFT073 / ATCC 700928 / UPEC) GN=cydA PE=3 SV=1	CYDA_ECOL6 (+1)	cydA	58 kDa	5
149	Translation initiation factor IF-2 OS=Escherichia coli O127:H6 (strain E2348/69 / EPEC) GN=infB PE=3 SV=1	IF2_ECO27 (+6)	infB	97 kDa	5
150	tRNA-2-methylthio-N(6)-dimethylallyladenosine synthase OS=Escherichia coli O139:H28 (strain E24377A / ETEC) GN=miaB PE=3 SV=1	MIAB_ECO24 (+17)	miaB	54 kDa	5
151	Galactitol 1-phosphate 5-dehydrogenase OS=Escherichia coli O157:H7 GN=gatD PE=3 SV=1	GATD_ECO57 (+1)	gatD	37 kDa	5
152	CTP synthase OS=Escherichia coli O139:H28 (strain E24377A / ETEC) GN=pyrG PE=3 SV=1	PYRG_ECO24 (+19)	pyrG	60 kDa			4
153	Major outer membrane lipoprotein OS=Escherichia coli O157:H7 GN=lpp PE=3 SV=1	LPP_ECO57 (+2)	lpp	8 kDa	3
154	L-threonine 3-dehydrogenase OS=Escherichia coli O139:H28 (strain E24377A / ETEC) GN=tdh PE=3 SV=1	TDH_ECO24 (+20)	tdh	37 kDa	3
155	4-hydroxy-3-methylbut-2-en-1-yl diphosphate synthase (flavodoxin) OS=Escherichia coli O139:H28 (strain E24377A / ETEC) GN=ispG PE=3 SV=1	ISPG_ECO24 (+20)	ispG	41 kDa	2
156	Fe/S biogenesis protein NfuA OS=Escherichia coli O139:H28 (strain E24377A / ETEC) GN=nfuA PE=3 SV=1	NFUA_ECO24 (+20)	nfuA	21 kDa			2
157	NADH dehydrogenase OS=Escherichia coli (strain K12) GN=ndh PE=1 SV=2	DHNA_ECOLI	ndh	47 kDa					2
158	Periplasmic serine endoprotease DegP OS=Escherichia coli O157:H7 GN=degP PE=3 SV=1	DEGP_ECO57 (+1)	degP	49 kDa		1			1
159	DNA-directed RNA polymerase subunit alpha OS=Escherichia coli O139:H28 (strain E24377A / ETEC) GN=rpoA PE=1 SV=1	RPOA_ECO24 (+7)	rpoA	37 kDa	2
160	50S ribosomal protein L19 OS=Escherichia coli O139:H28 (strain E24377A / ETEC) GN=rplS PE=3 SV=1	RL19_ECO24 (+20)	rplS	13 kDa	2				1
161	RNase adapter protein RapZ OS=Escherichia coli O139:H28 (strain E24377A / ETEC) GN=rapZ PE=3 SV=1	RAPZ_ECO24 (+20)	rapZ	32 kDa			2		2
162	Ribonuclease E OS=Escherichia coli (strain K12) GN=rne PE=1 SV=6	RNE_ECOLI	rne	118 kDa					1
163	Keratin, type I cytoskeletal 16 OS=Homo sapiens GN=KRT16 PE=1 SV=4	K1C16_HUMAN	KRT16	51 kDa		3
164	UPF0301 protein YqgE OS=Escherichia coli O139:H28 (strain E24377A / ETEC) GN=yqgE PE=3 SV=1	YQGE_ECO24 (+17)	yqgE	21 kDa					2
165	Purine nucleoside phosphorylase DeoD-type OS=Escherichia coli O139:H28 (strain E24377A / ETEC) GN=deoD PE=3 SV=1	DEOD_ECO24 (+18)	deoD	26 kDa		4
166	CDP-diacylglycerol--serine O-phosphatidyltransferase OS=Escherichia coli (strain K12) GN=pssA PE=1 SV=2	PSS_ECOLI	pssA	53 kDa	4
167	ATP-dependent RNA helicase RhlB OS=Escherichia coli O139:H28 (strain E24377A / ETEC) GN=rhlB PE=3 SV=1	RHLB_ECO24 (+20)	rhlB	47 kDa			4
168	Suprabasin OS=Homo sapiens GN=SBSN PE=1 SV=2	SBSN_HUMAN	SBSN	61 kDa			4
169	Keratin, type I cytoskeletal 13 OS=Homo sapiens GN=KRT13 PE=1 SV=4	K1C13_HUMAN (+1)	KRT13	50 kDa					3
170	Thioredoxin 2 OS=Escherichia coli O157:H7 GN=trxC PE=3 SV=1	THIO2_ECO57 (+2)	trxC	16 kDa		2
171	50S ribosomal protein L24 OS=Escherichia coli O139:H28 (strain E24377A / ETEC) GN=rplX PE=3 SV=1	RL24_ECO24 (+20)	rplX	11 kDa	3
172	Protein RecA OS=Escherichia coli O139:H28 (strain E24377A / ETEC) GN=recA PE=3 SV=1	RECA_ECO24 (+18)	recA	38 kDa	3
173	Free methionine-R-sulfoxide reductase OS=Escherichia coli (strain K12) GN=msrC PE=1 SV=2	MSRC_ECOLI	msrC	18 kDa			3
174	Alcohol dehydrogenase, propanol-preferring OS=Escherichia coli (strain K12) GN=adhP PE=1 SV=1	ADHP_ECOLI	adhP	35 kDa					3
175	Glutamate-pyruvate aminotransferase AlaC OS=Escherichia coli (strain K12) GN=alaC PE=1 SV=1	ALAC_ECOLI	alaC	46 kDa			2
176	DNA gyrase inhibitor OS=Escherichia coli (strain K12) GN=sbmC PE=1 SV=1	SBMC_ECOLI	sbmC	18 kDa		2
177	Cell division protein ZapB OS=Escherichia coli O139:H28 (strain E24377A / ETEC) GN=zapB PE=3 SV=2	ZAPB_ECO24 (+19)	zapB	10 kDa					3
178	Filaggrin OS=Homo sapiens GN=FLG PE=1 SV=3	FILA_HUMAN (+8)	FLG	435 kDa			2
179	2-oxoglutarate dehydrogenase E1 component OS=Escherichia coli O157:H7 GN=sucA PE=3 SV=1	ODO1_ECO57 (+2)	sucA	105 kDa	2
180	UPF0265 protein YeeX OS=Escherichia coli O139:H28 (strain E24377A / ETEC) GN=yeeX PE=3 SV=1	YEEX_ECO24 (+11)	yeeX	13 kDa	2
181	3,4-dihydroxy-2-butanone 4-phosphate synthase OS=Escherichia coli O17:K52:H18 (strain UMN026 / ExPEC) GN=ribB PE=3 SV=1	RIBB_ECOLU (+1)	ribB	23 kDa			2
182	ATP-dependent RNA helicase DeaD OS=Escherichia coli O157:H7 GN=deaD PE=3 SV=3	DEAD_ECO57 (+2)	deaD	71 kDa	3
183	DNA polymerase III subunit delta' OS=Escherichia coli (strain K12) GN=holB PE=1 SV=2	HOLB_ECOLI	holB	37 kDa					2
184	Small heat shock protein IbpA OS=Escherichia coli O139:H28 (strain E24377A / ETEC) GN=ibpA PE=3 SV=1	IBPA_ECO24 (+19)	ibpA	16 kDa					3
185	50S ribosomal protein L17 OS=Escherichia coli O139:H28 (strain E24377A / ETEC) GN=rplQ PE=3 SV=1	RL17_ECO24 (+20)	rplQ	14 kDa					3
186	PhoH-like protein OS=Escherichia coli O157:H7 GN=ybeZ PE=3 SV=2	PHOL_ECO57 (+2)	ybeZ	39 kDa					3
187	Agmatinase OS=Escherichia coli O139:H28 (strain E24377A / ETEC) GN=speB PE=3 SV=1	SPEB_ECO24 (+18)	speB	34 kDa			2
188	Desmoplakin OS=Homo sapiens GN=DSP PE=1 SV=3	DESP_HUMAN (+2)	DSP	332 kDa		1
189	Glutaredoxin 4 OS=Escherichia coli O157:H7 GN=grxD PE=3 SV=1	GLRX4_ECO57 (+2)	grxD	13 kDa	1
190	50S ribosomal protein L18 OS=Escherichia coli O139:H28 (strain E24377A / ETEC) GN=rplR PE=3 SV=1	RL18_ECO24 (+20)	rplR	13 kDa	2
191	Magnesium and cobalt efflux protein CorC OS=Escherichia coli O157:H7 GN=corC PE=3 SV=1	CORC_ECO57 (+2)	corC	33 kDa			2
192	Trehalose-6-phosphate hydrolase OS=Escherichia coli (strain K12) GN=treC PE=1 SV=3	TREC_ECOLI	treC	64 kDa			2
193	50S ribosomal protein L20 OS=Escherichia coli O139:H28 (strain E24377A / ETEC) GN=rplT PE=3 SV=1	RL20_ECO24 (+20)	rplT	13 kDa	2
194	Keratin, type II cytoskeletal 71 OS=Homo sapiens GN=KRT71 PE=1 SV=3	K2C71_HUMAN	KRT71	57 kDa				1
195	3-oxoacyl-[acyl-carrier-protein] synthase 3 OS=Escherichia coli O139:H28 (strain E24377A / ETEC) GN=fabH PE=3 SV=1	FABH_ECO24 (+8)	fabH	34 kDa			1
196	Cell division ATP-binding protein FtsE OS=Escherichia coli O157:H7 GN=ftsE PE=3 SV=1	FTSE_ECO57 (+2)	ftsE	24 kDa	2
197	Probable malate:quinone oxidoreductase OS=Escherichia coli O139:H28 (strain E24377A / ETEC) GN=mqo PE=3 SV=1	MQO_ECO24 (+19)	mqo	60 kDa					1
198	Delta-aminolevulinic acid dehydratase OS=Escherichia coli (strain K12) GN=hemB PE=1 SV=2	HEM2_ECOLI	hemB	36 kDa					1
199	Glyceraldehyde-3-phosphate dehydrogenase A OS=Escherichia coli O157:H7 GN=gapA PE=3 SV=2	G3P1_ECO57 (+2)	gapA	36 kDa	1
200	Thioredoxin 1 OS=Escherichia coli O157:H7 GN=trxA PE=1 SV=2	THIO_ECO57 (+2)	trxA	12 kDa	1
201	Alanine--tRNA ligase OS=Escherichia coli O139:H28 (strain E24377A / ETEC) GN=alaS PE=3 SV=1	SYA_ECO24 (+9)	alaS	96 kDa	1
202	Hemoglobin subunit alpha OS=Homo sapiens GN=HBA1 PE=1 SV=2	HBA_HUMAN (+12)	HBA1	15 kDa				2
203	Adenosine deaminase OS=Escherichia coli O139:H28 (strain E24377A / ETEC) GN=add PE=3 SV=1	ADD_ECO24 (+19)	add	36 kDa	2
204	Cytochrome bo(3) ubiquinol oxidase subunit 2 OS=Escherichia coli O6:H1 (strain CFT073 / ATCC 700928 / UPEC) GN=cyoA PE=3 SV=1	CYOA_ECOL6 (+1)	cyoA	35 kDa	1
205	Fumarate hydratase class I, aerobic OS=Escherichia coli O157:H7 GN=fumA PE=3 SV=3	FUMA_ECO57 (+2)	fumA	60 kDa	2
206	Lactose operon repressor OS=Escherichia coli (strain K12) GN=lacI PE=1 SV=3	LACI_ECOLI	lacI	39 kDa	2
207	Hydrogenase-2 large chain OS=Escherichia coli O157:H7 GN=hybC PE=3 SV=2	MBHM_ECO57 (+1)	hybC	62 kDa	2
208	D-methionine-binding lipoprotein MetQ OS=Escherichia coli O157:H7 GN=metQ PE=3 SV=1	METQ_ECO57 (+1)	metQ	29 kDa	2
209	Succinate dehydrogenase iron-sulfur subunit OS=Escherichia coli (strain K12) GN=sdhB PE=1 SV=1	SDHB_ECOLI	sdhB	27 kDa	2
210	Tryptophanase OS=Escherichia coli O139:H28 (strain E24377A / ETEC) GN=tnaA PE=3 SV=1	TNAA_ECO24 (+18)	tnaA	53 kDa	2
211	D-alanyl-D-alanine carboxypeptidase DacB OS=Escherichia coli (strain K12) GN=dacB PE=1 SV=2	DACB_ECOLI	dacB	52 kDa			2
212	Glyceraldehyde-3-phosphate dehydrogenase OS=Homo sapiens GN=GAPDH PE=1 SV=3	G3P_HUMAN (+5)	GAPDH	36 kDa			2
213	Molybdopterin-guanine dinucleotide biosynthesis adapter protein OS=Escherichia coli (strain K12) GN=mobB PE=1 SV=3	MOBB_ECOLI	mobB	19 kDa			2
214	30S ribosomal protein S6 OS=Escherichia coli O139:H28 (strain E24377A / ETEC) GN=rpsF PE=3 SV=1	RS6_ECO24 (+19)	rpsF	15 kDa			2
215	Negative modulator of initiation of replication OS=Escherichia coli O6:H1 (strain CFT073 / ATCC 700928 / UPEC) GN=seqA PE=3 SV=1	SEQA_ECOL6 (+1)	seqA	20 kDa			2
216	Thioredoxin OS=Homo sapiens GN=TXN PE=1 SV=3	THIO_HUMAN (+1)	TXN	12 kDa			1
217	Probable quinol monooxygenase YgiN OS=Escherichia coli O157:H7 GN=ygiN PE=3 SV=1	YGIN_ECO57 (+1)	ygiN	12 kDa			2
218	HTH-type transcriptional regulator ZntR OS=Escherichia coli O157:H7 GN=zntR PE=3 SV=1	ZNTR_ECO57 (+1)	zntR	16 kDa			2
219	Arabinose 5-phosphate isomerase GutQ OS=Escherichia coli O157:H7 GN=gutQ PE=3 SV=3	GUTQ_ECO57 (+2)	gutQ	34 kDa					2
220	Transcriptional repressor IclR OS=Escherichia coli (strain K12) GN=iclR PE=1 SV=1	ICLR_ECOLI	iclR	30 kDa					2
221	Primosomal protein N' OS=Escherichia coli (strain K12) GN=priA PE=1 SV=2	PRIA_ECOLI	priA	82 kDa					2
222	Protein YdcF OS=Escherichia coli (strain K12) GN=ydcF PE=1 SV=3	YDCF_ECOLI	ydcF	30 kDa					2
223	Epimerase family protein YfcH OS=Escherichia coli (strain K12) GN=yfcH PE=3 SV=1	YFCH_ECOLI	yfcH	33 kDa					1
224	Collagen alpha-1(III) chain OS=Homo sapiens GN=COL3A1 PE=1 SV=4	CO3A1_HUMAN	COL3A1	139 kDa				1
225	Histidine biosynthesis bifunctional protein HisB OS=Escherichia coli O157:H7 GN=hisB PE=1 SV=1	HIS7_ECO57 (+1)	hisB	40 kDa				1
226	N-hydroxyarylamine O-acetyltransferase OS=Escherichia coli (strain K12) GN=nhoA PE=1 SV=1	NHOA_ECOLI	nhoA	32 kDa				1
227	Tyrosine recombinase XerC OS=Escherichia coli O139:H28 (strain E24377A / ETEC) GN=xerC PE=3 SV=1	XERC_ECO24 (+20)	xerC	34 kDa				1
228	Galactose/methyl galactoside import ATP-binding protein MglA OS=Escherichia coli O157:H7 GN=mglA PE=3 SV=3	MGLA_ECO57 (+4)	mglA	56 kDa	1
229	Membrane protein insertase YidC OS=Escherichia coli O127:H6 (strain E2348/69 / EPEC) GN=yidC PE=3 SV=1	YIDC_ECO27 (+19)	yidC	62 kDa	1
230	Blue copper oxidase CueO OS=Escherichia coli O157:H7 GN=cueO PE=3 SV=1	CUEO_ECO57 (+1)	cueO	57 kDa			1
231	Pyridoxine/pyridoxamine 5'-phosphate oxidase OS=Escherichia coli O139:H28 (strain E24377A / ETEC) GN=pdxH PE=3 SV=1	PDXH_ECO24 (+19)	pdxH	26 kDa			1
232	Exodeoxyribonuclease 7 small subunit OS=Escherichia coli O139:H28 (strain E24377A / ETEC) GN=xseB PE=3 SV=1	EX7S_ECO24 (+18)	xseB	9 kDa					1
233	Bifunctional uridylyltransferase/uridylyl-removing enzyme OS=Escherichia coli O139:H28 (strain E24377A / ETEC) GN=glnD PE=3 SV=1	GLND_ECO24 (+20)	glnD	102 kDa					1
234	Hydrogenase maturation factor HypB OS=Escherichia coli O6:H1 (strain CFT073 / ATCC 700928 / UPEC) GN=hypB PE=3 SV=1	HYPB_ECOL6 (+1)	hypB	32 kDa					1
235	Inosine-5'-monophosphate dehydrogenase OS=Escherichia coli O157:H7 GN=guaB PE=3 SV=1	IMDH_ECO57 (+1)	guaB	52 kDa					1
236	PTS system glucose-specific EIIA component OS=Escherichia coli O6:H1 (strain CFT073 / ATCC 700928 / UPEC) GN=crr PE=3 SV=2	PTGA_ECOL6 (+1)	crr	18 kDa					1
END OF FILE
