# Supplementary material for: JMJD6 cleaves MePCE to release positive transcription elongation factor b (P-TEFb) in higher eukaryotes
Source: eLife. 2020 Feb 12;9:e53930. doi: 10.7554/eLife.53930 (PMC7064345; doi:10.7554/eLife.53930)
Supplement: Supplementary file 3. [file elife-53930-supp3.xlsx]

## Sheet: Sheet1
Gene_symbol	NAME	MEF	JM6KO	JM6KO_JM6OE
0610005C13Rik	RIKEN cDNA 0610005C13 gene	0.0583581	0.261387	0.0471144
0610007P14Rik	RIKEN cDNA 0610007P14 gene	30.1128	22.7407	37.1733
0610009B22Rik	RIKEN cDNA 0610009B22 gene	6.76954	10.9783	10.9777
0610009L18Rik	RIKEN cDNA 0610009L18 gene	0.29179	0.888717	1.22497
0610009O20Rik	RIKEN cDNA 0610009O20 gene	37.9911	40.2014	24.0755
0610010B08Rik	RIKEN cDNA 0610010B08 gene	28.0119	30.2687	16.0189
0610010F05Rik	RIKEN cDNA 0610010F05 gene	24.1019	23.4726	29.258
0610010K14Rik	RIKEN cDNA 0610010K14 gene	15.4065	11.0828	30.7186
0610011F06Rik	RIKEN cDNA 0610011F06 gene	3.55984	3.08437	5.5595
0610012G03Rik	RIKEN cDNA 0610012G03 gene	18.8497	10.2987	22.662
0610030E20Rik	RIKEN cDNA 0610030E20 gene	22.4679	21.6429	27.3264
0610031J06Rik	NA	53.6894	61.0078	74.1581
0610031O16Rik	RIKEN cDNA 0610031O16 gene	0	0	0
0610037L13Rik	RIKEN cDNA 0610037L13 gene	16.6321	19.6563	21.5784
0610038B21Rik	RIKEN cDNA 0610038B21 gene	0.29179	0.575052	0.518258
0610039K10Rik	RIKEN cDNA 0610039K10 gene	0.175074	0.104555	0.0942288
0610040B10Rik	RIKEN cDNA 0610040B10 gene	0.116716	0.261387	0.282686
0610040F04Rik	RIKEN cDNA 0610040F04 gene	0	0	0.0471144
0610040J01Rik	RIKEN cDNA 0610040J01 gene	0.116716	0	0.0942288
0610043K17Rik	RIKEN cDNA 0610043K17 gene	0	0	0
1010001N08Rik	RIKEN cDNA 1010001N08 gene	0.29179	0.20911	0.0942288
1100001G20Rik	NA	0.175074	0.470497	0.42403
1110001J03Rik	RIKEN cDNA 1110001J03 gene	3.6182	2.24793	5.51238
1110002L01Rik	RIKEN cDNA 1110002L01 gene	4.49357	4.65269	7.96233
1110004E09Rik	RIKEN cDNA 1110004E09 gene	16.7488	14.0104	19.7409
1110004F10Rik	RIKEN cDNA 1110004F10 gene	66.7033	96.7656	60.542
1110006O24Rik	RIKEN cDNA 1110006O24 gene	0.992087	0.20911	0.895174
1110007C09Rik	RIKEN cDNA 1110007C09 gene	25.2107	14.0626	7.02005
1110008F13Rik	RIKEN cDNA 1110008F13 gene	65.5945	76.4819	75.1946
1110008L16Rik	RIKEN cDNA 1110008L16 gene	11.7883	11.7102	13.4747
1110008P14Rik	RIKEN cDNA 1110008P14 gene	12.7804	8.73034	11.7786
1110012L19Rik	RIKEN cDNA 1110012L19 gene	10.6795	14.3763	13.6161
1110015O18Rik	RIKEN cDNA 1110015O18 gene	0	0	0
1110017D15Rik	RIKEN cDNA 1110017D15 gene	0	0	0.329801
1110019D14Rik	RIKEN cDNA 1110019D14 gene	0.758655	2.0911	1.60189
1110020A21Rik	RIKEN cDNA 1110020A21 gene	0	0.0522775	0.42403
1110025L11Rik	RIKEN cDNA 1110025L11 gene	0	0	0
1110028F11Rik	RIKEN cDNA 1110028F11 gene	0	0	0
1110028F18Rik	RIKEN cDNA 1110028F18 gene	0	0	0
1110032A03Rik	RIKEN cDNA 1110032A03 gene	3.50148	4.96636	2.02592
1110032F04Rik	RIKEN cDNA 1110032F04 gene	0	0	0
1110034G24Rik	RIKEN cDNA 1110034G24 gene	1.34224	1.82971	1.60189
1110036E04Rik	RIKEN cDNA 1110036E04 gene	0	0	0
1110037F02Rik	RIKEN cDNA 1110037F02 gene	146.654	142.77	106.29
1110038B12Rik	RIKEN cDNA 1110038B12 gene	49.3709	65.19	82.0733
1110038F14Rik	RIKEN cDNA 1110038F14 gene	28.6538	22.0611	11.543
1110046J04Rik	RIKEN cDNA 1110046J04 gene	1.63403	2.82298	3.48647
1110051M20Rik	RIKEN cDNA 1110051M20 gene	17.6241	21.5383	23.887
1110054M08Rik	NA	2.68447	1.82971	3.10955
1110057K04Rik	NA	40.7339	49.925	39.3876
1110058L19Rik	NA	6.30267	6.90063	10.8834
1110059E24Rik	RIKEN cDNA 1110059E24 gene	26.4946	21.2247	28.1273
1110059G10Rik	RIKEN cDNA 1110059G10 gene	10.2127	11.5533	9.42288
1110065P20Rik	RIKEN cDNA 1110065P20 gene	14.2977	12.6511	13.4276
1190002F15Rik	RIKEN cDNA 1190002F15 gene	7.11968	5.3323	5.41816
1190002N15Rik	RIKEN cDNA 1190002N15 gene	60.9842	76.3774	11.2132
1190003K10Rik	RIKEN cDNA 1190003K10 gene	0	0	0
1190005I06Rik	RIKEN cDNA 1190005I06 gene	1.57567	0.731884	0.612487
1190007I07Rik	RIKEN cDNA 1190007I07 gene	2.39268	1.56832	1.649
1200014J11Rik	RIKEN cDNA 1200014J11 gene	42.7765	44.645	35.9012
1300002E11Rik	RIKEN cDNA 1300002E11 gene	3.20969	3.13665	5.41816
1300002K09Rik	NA	0	0	0
1300017J02Rik	RIKEN cDNA 1300017J02 gene	0.233432	0.0522775	0
1500004A13Rik	RIKEN cDNA 1500004A13 gene	7.06133	0.62733	5.04124
1500009C09Rik	RIKEN cDNA 1500009C09 gene	0.0583581	0.0522775	0
1500009L16Rik	RIKEN cDNA 1500009L16 gene	1.45895	0.104555	0
1500011B03Rik	RIKEN cDNA 1500011B03 gene	2.85955	2.82298	2.54418
1500011K16Rik	RIKEN cDNA 1500011K16 gene	0.758655	3.60714	4.2403
1500012F01Rik	RIKEN cDNA 1500012F01 gene	23.6934	30.896	41.1309
1500012K07Rik	RIKEN cDNA 1500012K07 gene	0	0	0
1500015A07Rik	RIKEN cDNA 1500015A07 gene	0.758655	0.940994	3.86338
1500015L24Rik	RIKEN cDNA 1500015L24 gene	0	0	0
1500015O10Rik	RIKEN cDNA 1500015O10 gene	0	0.0522775	0
1500017E21Rik	RIKEN cDNA 1500017E21 gene	0	0	0.0942288
1600002D24Rik	RIKEN cDNA 1600002D24 gene	0	0.0522775	0
1600002H07Rik	RIKEN cDNA 1600002H07 gene	15.1147	10.2464	10.0354
1600002K03Rik	RIKEN cDNA 1600002K03 gene	3.32641	6.90063	2.40283
1600010M07Rik	RIKEN cDNA 1600010M07 gene	0.175074	0	0.0942288
1600012H06Rik	RIKEN cDNA 1600012H06 gene	34.7814	39.1035	49.7528
1600014C10Rik	RIKEN cDNA 1600014C10 gene	12.7804	26.0865	12.2497
1600014C23Rik	RIKEN cDNA 1600014C23 gene	0.0583581	0	0
1600014K23Rik	RIKEN cDNA 1600014K23 gene	0	0	0
1600015I10Rik	RIKEN cDNA 1600015I10 gene	0	0	0
1600016N20Rik	NA	0.466865	0	0.329801
1600019K03Rik	RIKEN cDNA 1600019K03 gene	0.0583581	0.156832	0.0942288
1600020E01Rik	RIKEN cDNA 1600020E01 gene	0.817013	1.77743	2.59129
1600023N17Rik	RIKEN cDNA 1600023N17 gene	0.233432	0.156832	0.141343
1600025M17Rik	RIKEN cDNA 1600025M17 gene	0	0	0.0942288
1600027J07Rik	RIKEN cDNA 1600027J07 gene	0.175074	0.0522775	0
1600029I14Rik	RIKEN cDNA 1600029I14 gene	0	0.0522775	0
1600029O15Rik	RIKEN cDNA 1600029O15 gene	0.0583581	0	0.518258
1700001C02Rik	RIKEN cDNA 1700001C02 gene	0	0	0
1700001C19Rik	RIKEN cDNA 1700001C19 gene	0	0	0
1700001D01Rik	RIKEN cDNA 1700001D01 gene	0	0	0
1700001F09Rik	RIKEN cDNA 1700001F09 gene	0	0	0
1700001G11Rik	RIKEN cDNA 1700001G11 gene	0.233432	0.104555	0.235572
1700001G17Rik	RIKEN cDNA 1700001G17 gene	0.29179	0.20911	0.800945
1700001J03Rik	RIKEN cDNA 1700001J03 gene	0	0	0
1700001J11Rik	RIKEN cDNA 1700001J11 gene	0.408507	0.156832	0.659602
1700001K19Rik	RIKEN cDNA 1700001K19 gene	0.0583581	0.20911	0.0942288
1700001K23Rik	RIKEN cDNA 1700001K23 gene	0	0	0.0471144
1700001L05Rik	RIKEN cDNA 1700001L05 gene	0.641939	1.67288	0.706716
1700001L19Rik	RIKEN cDNA 1700001L19 gene	0.0583581	0	0
1700001O22Rik	RIKEN cDNA 1700001O22 gene	0.175074	0	0
1700001P01Rik	RIKEN cDNA 1700001P01 gene	0	0	0.141343
1700003C15Rik	RIKEN cDNA 1700003C15 gene	0	0	0
1700003D09Rik	RIKEN cDNA 1700003D09 gene	0	0	0
1700003E16Rik	RIKEN cDNA 1700003E16 gene	0.583581	0.575052	1.3192
1700003E24Rik	RIKEN cDNA 1700003E24 gene	0	0.0522775	0
1700003F12Rik	RIKEN cDNA 1700003F12 gene	1.28388	0.470497	1.3192
1700003G13Rik	RIKEN cDNA 1700003G13 gene	0	0	0
1700003G18Rik	RIKEN cDNA 1700003G18 gene	0.0583581	0.0522775	0
1700003H04Rik	RIKEN cDNA 1700003H04 gene	0	0	0
1700003L19Rik	RIKEN cDNA 1700003L19 gene	0	0	0
1700003M02Rik	RIKEN cDNA 1700003M02 gene	0.0583581	0	0
1700003M07Rik	RIKEN cDNA 1700003M07 gene	1.40059	0.784162	0.0471144
1700003P14Rik	RIKEN cDNA 1700003P14 gene	0	0	0
1700006A11Rik	RIKEN cDNA 1700006A11 gene	0	0	0
1700006E09Rik	RIKEN cDNA 1700006E09 gene	0	0	0
1700006F04Rik	RIKEN cDNA 1700006F04 gene	0	0	0
1700006H21Rik	RIKEN cDNA 1700006H21 gene	0	0	0.0471144
1700007B14Rik	RIKEN cDNA 1700007B14 gene	0	0	0
1700007F19Rik	RIKEN cDNA 1700007F19 gene	0	0.104555	0
1700007G11Rik	RIKEN cDNA 1700007G11 gene	0	0	0
1700007J10Rik	RIKEN cDNA 1700007J10 gene	0.116716	0.156832	0.42403
1700007K09Rik	RIKEN cDNA 1700007K09 gene	0.233432	0.104555	0.141343
1700007K13Rik	RIKEN cDNA 1700007K13 gene	2.04253	0.41822	0.0471144
1700007L15Rik	RIKEN cDNA 1700007L15 gene	0.641939	0.679607	0.706716
1700007P06Rik	RIKEN cDNA 1700007P06 gene	0.0583581	0.0522775	0.235572
1700008F21Rik	NA	0	0.156832	0
1700008I05Rik	NA	0	0	0
1700008J07Rik	RIKEN cDNA 1700008J07 gene	2.5094	3.34576	2.30861
1700008K24Rik	RIKEN cDNA 1700008K24 gene	0	0	0
1700008O03Rik	RIKEN cDNA 1700008O03 gene	0	0	0.0471144
1700008P02Rik	RIKEN cDNA 1700008P02 gene	0	0	0
1700009C05Rik	RIKEN cDNA 1700009C05 gene	0	0	0
1700009J07Rik	RIKEN cDNA 1700009J07 gene	0	0	0
1700009N14Rik	RIKEN cDNA 1700009N14 gene	0.175074	0.888717	0.42403
1700009P17Rik	NA	0.175074	0.888717	0
1700010B08Rik	RIKEN cDNA 1700010B08 gene	0	0	0.0471144
1700010D01Rik	RIKEN cDNA 1700010D01 gene	0	0	0
1700010I02Rik	RIKEN cDNA 1700010I02 gene	0	0	0
1700010I14Rik	RIKEN cDNA 1700010I14 gene	0.116716	0.679607	2.26149
1700010J16Rik	RIKEN cDNA 1700010J16 gene	0	0	0
1700010K23Rik	RIKEN cDNA 1700010K23 gene	0	0	0
1700011A15Rik	RIKEN cDNA 1700011A15 gene	0	0	0.141343
1700011B04Rik	RIKEN cDNA 1700011B04 gene	0	0	0
1700011E24Rik	RIKEN cDNA 1700011E24 gene	0	0	0.0942288
1700011H14Rik	RIKEN cDNA 1700011H14 gene	0	0	0
1700011I03Rik	RIKEN cDNA 1700011I03 gene	0	0	0
1700011L22Rik	RIKEN cDNA 1700011L22 gene	0.0583581	0	0.0471144
1700011M02Rik	RIKEN cDNA 1700011M02 gene	0	0	0
1700012A03Rik	RIKEN cDNA 1700012A03 gene	0	0	0
1700012B07Rik	RIKEN cDNA 1700012B07 gene	0	0	0
1700012B09Rik	RIKEN cDNA 1700012B09 gene	0	0	0
1700012D01Rik	RIKEN cDNA 1700012D01 gene	0.408507	0.62733	0.471144
1700012D14Rik	RIKEN cDNA 1700012D14 gene	0	0.0522775	0.0942288
1700012I11Rik	RIKEN cDNA 1700012I11 gene	0	0	0
1700012L04Rik	RIKEN cDNA 1700012L04 gene	0	0	0
1700012P22Rik	RIKEN cDNA 1700012P22 gene	0	0	0
1700013D24Rik	RIKEN cDNA 1700013D24 gene	0	0	0
1700013F07Rik	RIKEN cDNA 1700013F07 gene	0	0.104555	0.0942288
1700013G24Rik	RIKEN cDNA 1700013G24 gene	0	0	0
1700013H16Rik	RIKEN cDNA 1700013H16 gene	0	0	0.188458
1700015E13Rik	RIKEN cDNA 1700015E13 gene	0	0	0
1700015F17Rik	RIKEN cDNA 1700015F17 gene	0.0583581	0	0.42403
1700015G11Rik	RIKEN cDNA 1700015G11 gene	0	0	0
1700016C15Rik	RIKEN cDNA 1700016C15 gene	0	0	0.0942288
1700016D06Rik	RIKEN cDNA 1700016D06 gene	0	0.0522775	0.141343
1700016G22Rik	RIKEN cDNA 1700016G22 gene	0	0	0
1700016H13Rik	RIKEN cDNA 1700016H13 gene	0	0	0
1700016K19Rik	RIKEN cDNA 1700016K19 gene	0	0.104555	0
1700016L04Rik	RIKEN cDNA 1700016L04 gene	0.0583581	0	0
1700016L21Rik	RIKEN cDNA 1700016L21 gene	0	0	0
1700016P04Rik	RIKEN cDNA 1700016P04 gene	0	0	0
1700017B05Rik	RIKEN cDNA 1700017B05 gene	85.6113	66.6015	34.3935
1700017D01Rik	RIKEN cDNA 1700017D01 gene	0	0	0
1700017G19Rik	RIKEN cDNA 1700017G19 gene	0	0	0
1700017J07Rik	RIKEN cDNA 1700017J07 gene	0	0	0
1700017N19Rik	RIKEN cDNA 1700017N19 gene	0	0	0
1700018A04Rik	RIKEN cDNA 1700018A04 gene	0	0	1.649
1700018B08Rik	RIKEN cDNA 1700018B08 gene	0	0	0
1700018B24Rik	RIKEN cDNA 1700018B24 gene	0	0	0
1700018C11Rik	RIKEN cDNA 1700018C11 gene	0	0	0
1700018F24Rik	RIKEN cDNA 1700018F24 gene	0	0	0
1700018G05Rik	RIKEN cDNA 1700018G05 gene	0	0	0
1700018L02Rik	RIKEN cDNA 1700018L02 gene	0.583581	0.575052	0.706716
1700019A02Rik	RIKEN cDNA 1700019A02 gene	0	0	0
1700019B03Rik	RIKEN cDNA 1700019B03 gene	0	0	0
1700019B21Rik	RIKEN cDNA 1700019B21 gene	0	0	0
1700019D03Rik	RIKEN cDNA 1700019D03 gene	0	0.156832	0
1700019E08Rik	RIKEN cDNA 1700019E08 gene	0	0	0
1700019G17Rik	RIKEN cDNA 1700019G17 gene	0.408507	0.470497	0.565373
1700019G24Rik	RIKEN cDNA 1700019G24 gene	0	0	0
1700019L03Rik	RIKEN cDNA 1700019L03 gene	0.350148	1.1501	2.26149
1700019M22Rik	RIKEN cDNA 1700019M22 gene	0	0	0
1700019N19Rik	RIKEN cDNA 1700019N19 gene	0	0	0
1700019O17Rik	RIKEN cDNA 1700019O17 gene	0	0	0.0942288
1700020A23Rik	RIKEN cDNA 1700020A23 gene	0.0583581	0.0522775	0.0471144
1700020D05Rik	RIKEN cDNA 1700020D05 gene	0.116716	0.365942	0.895174
1700020G17Rik	RIKEN cDNA 1700020G17 gene	0	0	0
1700020I14Rik	RIKEN cDNA 1700020I14 gene	45.1691	35.8623	34.2522
1700020L24Rik	RIKEN cDNA 1700020L24 gene	2.15925	3.7117	0.376915
1700020M21Rik	RIKEN cDNA 1700020M21 gene	0	0	0
1700020N01Rik	RIKEN cDNA 1700020N01 gene	0	0	0.0471144
1700020N15Rik	RIKEN cDNA 1700020N15 gene	0	0	0
1700020N18Rik	RIKEN cDNA 1700020N18 gene	0	0	0
1700021F05Rik	RIKEN cDNA 1700021F05 gene	14.4728	11.6056	21.1073
1700021F07Rik	RIKEN cDNA 1700021F07 gene	0	0	0
1700021K19Rik	RIKEN cDNA 1700021K19 gene	70.2048	39.6263	59.0343
1700021N21Rik	RIKEN cDNA 1700021N21 gene	0	0	0
1700022A21Rik	RIKEN cDNA 1700022A21 gene	0	0	0
1700022A22Rik	RIKEN cDNA 1700022A22 gene	0	0	0
1700022E09Rik	RIKEN cDNA 1700022E09 gene	0	0	0
1700022H16Rik	RIKEN cDNA 1700022H16 gene	0	0	0
1700022I11Rik	RIKEN cDNA 1700022I11 gene	0	0.156832	0.188458
1700023C21Rik	RIKEN cDNA 1700023C21 gene	0	0	0
1700023E05Rik	NA	0	0	0
1700023F02Rik	RIKEN cDNA 1700023F02 gene	0	0	0
1700023F06Rik	RIKEN cDNA 1700023F06 gene	0.350148	0.104555	0.0471144
1700023L04Rik	NA	0	0	0
1700024B18Rik	RIKEN cDNA 1700024B18 gene	0	0	0
1700024F13Rik	RIKEN cDNA 1700024F13 gene	0.116716	0	0.0471144
1700024G13Rik	RIKEN cDNA 1700024G13 gene	0	0	0
1700024P04Rik	RIKEN cDNA 1700024P04 gene	0	0	0
1700024P16Rik	RIKEN cDNA 1700024P16 gene	1.28388	8.62578	19.6938
1700025B11Rik	RIKEN cDNA 1700025B11 gene	0	0	0
1700025C18Rik	RIKEN cDNA 1700025C18 gene	0	0	0
1700025F22Rik	RIKEN cDNA 1700025F22 gene	0	0	0
1700025F24Rik	RIKEN cDNA 1700025F24 gene	0	0	0
1700025G04Rik	RIKEN cDNA 1700025G04 gene	35.5984	23.734	43.3452
1700025K24Rik	RIKEN cDNA 1700025K24 gene	0	0	0
1700025M24Rik	RIKEN cDNA 1700025M24 gene	0.0583581	0	0
1700025N23Rik	RIKEN cDNA 1700025N23 gene	0	0.0522775	0
1700026D08Rik	RIKEN cDNA 1700026D08 gene	0.0583581	0.156832	0.235572
1700026D11Rik	RIKEN cDNA 1700026D11 gene	0	0	0
1700026F02Rik	RIKEN cDNA 1700026F02 gene	0	0	0
1700026L06Rik	RIKEN cDNA 1700026L06 gene	0.175074	0.0522775	0
1700027A15Rik	RIKEN cDNA 1700027A15 gene	0	0.0522775	0
1700027F09Rik	RIKEN cDNA 1700027F09 gene	0	0	0
1700027H10Rik	RIKEN cDNA 1700027H10 gene	0	0	0
1700027I24Rik	RIKEN cDNA 1700027I24 gene	0	0	0
1700027J07Rik	RIKEN cDNA 1700027J07 gene	0	0	0
1700028B04Rik	RIKEN cDNA 1700028B04 gene	0	0	0
1700028D13Rik	RIKEN cDNA 1700028D13 gene	0	0	0
1700028E10Rik	RIKEN cDNA 1700028E10 gene	0.0583581	0.0522775	0
1700028I16Rik	RIKEN cDNA 1700028I16 gene	0.0583581	0.156832	0.0471144
1700028J19Rik	RIKEN cDNA 1700028J19 gene	0.116716	0.0522775	0.0471144
1700028K03Rik	RIKEN cDNA 1700028K03 gene	1.57567	1.56832	1.08363
1700028M03Rik	RIKEN cDNA 1700028M03 gene	0	0	0
1700028P14Rik	RIKEN cDNA 1700028P14 gene	0	0	0
1700028P15Rik	RIKEN cDNA 1700028P15 gene	0	0	0
1700029B22Rik	RIKEN cDNA 1700029B22 gene	0	0	0
1700029F12Rik	RIKEN cDNA 1700029F12 gene	0	0	0
1700029H14Rik	RIKEN cDNA 1700029H14 gene	0.116716	0	0.0471144
1700029I15Rik	RIKEN cDNA 1700029I15 gene	0	0	0.141343
1700029J03Rik	RIKEN cDNA 1700029J03 gene	0	0	0
1700029J07Rik	RIKEN cDNA 1700029J07 gene	1.05045	1.51605	0.989402
1700029M20Rik	RIKEN cDNA 1700029M20 gene	0	0	0
1700029N11Rik	RIKEN cDNA 1700029N11 gene	0	0	0
1700029P11Rik	RIKEN cDNA 1700029P11 gene	0	0	0
1700030A11Rik	RIKEN cDNA 1700030A11 gene	0	0	0.0471144
1700030C10Rik	RIKEN cDNA 1700030C10 gene	3.20969	0	0.659602
1700030F04Rik	RIKEN cDNA 1700030F04 gene	0	0	0
1700030F18Rik	RIKEN cDNA 1700030F18 gene	0	0	0
1700030J22Rik	RIKEN cDNA 1700030J22 gene	0.641939	0.836439	0.42403
1700030K09Rik	RIKEN cDNA 1700030K09 gene	13.4224	12.808	11.9199
1700030L20Rik	RIKEN cDNA 1700030L20 gene	0	0.0522775	0
1700030M09Rik	RIKEN cDNA 1700030M09 gene	0	0	0
1700030N03Rik	RIKEN cDNA 1700030N03 gene	0	0.0522775	0
1700030O20Rik	RIKEN cDNA 1700030O20 gene	0	0	0
1700031A10Rik	RIKEN cDNA 1700031A10 gene	0	0	0
1700031F05Rik	RIKEN cDNA 1700031F05 gene	0	0	0
1700031M16Rik	RIKEN cDNA 1700031M16 gene	0	0.0522775	0.0942288
1700031P21Rik	RIKEN cDNA 1700031P21 gene	0	0	0
1700034E13Rik	RIKEN cDNA 1700034E13 gene	0	0	0
1700034F02Rik	NA	0.116716	0.20911	0.0942288
1700034G24Rik	RIKEN cDNA 1700034G24 gene	0	0	0
1700034H15Rik	RIKEN cDNA 1700034H15 gene	0	0.0522775	0.0471144
1700034I23Rik	RIKEN cDNA 1700034I23 gene	0	0	0.0942288
1700034J05Rik	RIKEN cDNA 1700034J05 gene	0.175074	0.104555	0.141343
1700034K08Rik	RIKEN cDNA 1700034K08 gene	0	0	0
1700034O15Rik	RIKEN cDNA 1700034O15 gene	0	0	0
1700034P13Rik	RIKEN cDNA 1700034P13 gene	0.0583581	0.156832	0.235572
1700036G14Rik	RIKEN cDNA 1700036G14 gene	0	0	0
1700037C18Rik	RIKEN cDNA 1700037C18 gene	0.992087	1.09783	1.13075
1700037H04Rik	RIKEN cDNA 1700037H04 gene	24.2186	8.62578	40.0944
1700039E15Rik	RIKEN cDNA 1700039E15 gene	0	0	0
1700039E22Rik	RIKEN cDNA 1700039E22 gene	0	0	0
1700040L02Rik	RIKEN cDNA 1700040L02 gene	0.0583581	0	0
1700041C23Rik	RIKEN cDNA 1700041C23 gene	0	0	0
1700041M19Rik	RIKEN cDNA 1700041M19 gene	0	0	0
1700042B14Rik	NA	0	0	0
1700042G07Rik	RIKEN cDNA 1700042G07 gene	0	0	0
1700042G15Rik	RIKEN cDNA 1700042G15 gene	0	0	0
1700042O10Rik	RIKEN cDNA 1700042O10 gene	0	0.156832	0.0471144
1700044C05Rik	RIKEN cDNA 1700044C05 gene	0	0	0
1700044K03Rik	RIKEN cDNA 1700044K03 gene	0	0	0
1700045H11Rik	RIKEN cDNA 1700045H11 gene	0	0	0
1700046C09Rik	RIKEN cDNA 1700046C09 gene	0	0	0
1700047A11Rik	RIKEN cDNA 1700047A11 gene	0	0	0
1700047E10Rik	RIKEN cDNA 1700047E10 gene	0.0583581	0.836439	0
1700047G03Rik	RIKEN cDNA 1700047G03 gene	0	0	0
1700047I17Rik2	RIKEN cDNA 1700047I17 gene 2	49.9545	61.2692	37.2204
1700047L14Rik	RIKEN cDNA 1700047L14 gene	0	0	0
1700047M11Rik	RIKEN cDNA 1700047M11 gene	0	0.0522775	0
1700048M11Rik	RIKEN cDNA 1700048M11 gene	0.116716	0.104555	0
1700048O20Rik	RIKEN cDNA 1700048O20 gene	3.32641	7.68479	3.43935
1700049E15Rik	RIKEN cDNA 1700049E15 gene	0	0	0
1700049E22Rik	RIKEN cDNA 1700049E22 gene	0	0	0
1700049G17Rik	RIKEN cDNA 1700049G17 gene	6.71118	8.88717	8.99885
1700049L16Rik	RIKEN cDNA 1700049L16 gene	0	0	0
1700051A21Rik	RIKEN cDNA 1700051A21 gene	0	0	0
1700052I22Rik	RIKEN cDNA 1700052I22 gene	0	0	0
1700052K11Rik	RIKEN cDNA 1700052K11 gene	6.94461	5.90735	7.96233
1700052N19Rik	NA	21.7092	25.1455	24.1697
1700054A03Rik	RIKEN cDNA 1700054A03 gene	0	0	0
1700054K19Rik	RIKEN cDNA 1700054K19 gene	0	0	0
1700054M17Rik	RIKEN cDNA 1700054M17 gene	0	0.0522775	0.0471144
1700054O13Rik	NA	0.0583581	0	0
1700055C04Rik	RIKEN cDNA 1700055C04 gene	0	0	0
1700055N04Rik	NA	0	0	0.141343
1700056E22Rik	RIKEN cDNA 1700056E22 gene	0.525223	0.731884	1.69612
1700057G04Rik	RIKEN cDNA 1700057G04 gene	0	0	0.0471144
1700057H15Rik	RIKEN cDNA 1700057H15 gene	0	0	0
1700060C16Rik	RIKEN cDNA 1700060C16 gene	0	0	0
1700060C20Rik	RIKEN cDNA 1700060C20 gene	0	0	0
1700061F12Rik	RIKEN cDNA 1700061F12 gene	0	0	0
1700061G19Rik	RIKEN cDNA 1700061G19 gene	0	0.104555	0.0471144
1700061I17Rik	RIKEN cDNA 1700061I17 gene	0	0	0
1700063A18Rik	RIKEN cDNA 1700063A18 gene	0	0	0
1700063D05Rik	RIKEN cDNA 1700063D05 gene	0.408507	0.0522775	0.0942288
1700063O14Rik	RIKEN cDNA 1700063O14 gene	0	0	0
1700064J06Rik	RIKEN cDNA 1700064J06 gene	0	0	0
1700064M15Rik	RIKEN cDNA 1700064M15 gene	0	0	0
1700065D16Rik	RIKEN cDNA 1700065D16 gene	0	0.156832	0
1700065I16Rik	RIKEN cDNA 1700065I16 gene	0	0	0
1700065J11Rik	RIKEN cDNA 1700065J11 gene	0	0	0
1700065J18Rik	RIKEN cDNA 1700065J18 gene	0	0	0
1700065L07Rik	RIKEN cDNA 1700065L07 gene	0	0	0
1700065O20Rik	RIKEN cDNA 1700065O20 gene	0	0	0
1700066B17Rik	RIKEN cDNA 1700066B17 gene	0	0	0
1700066B19Rik	RIKEN cDNA 1700066B19 gene	0	0	0
1700066M21Rik	RIKEN cDNA 1700066M21 gene	15.6983	11.5533	19.8823
1700066N21Rik	RIKEN cDNA 1700066N21 gene	0	0	0
1700066O22Rik	RIKEN cDNA 1700066O22 gene	0	0	0
1700067G17Rik	RIKEN cDNA 1700067G17 gene	0	0	0
1700067K01Rik	RIKEN cDNA 1700067K01 gene	0.0583581	0.0522775	0.0942288
1700067P10Rik	RIKEN cDNA 1700067P10 gene	0	0	0
1700069L16Rik	RIKEN cDNA 1700069L16 gene	0	0	0
1700069P05Rik	RIKEN cDNA 1700069P05 gene	0	0	0
1700071K01Rik	RIKEN cDNA 1700071K01 gene	0	0	0
1700071M16Rik	RIKEN cDNA 1700071M16 gene	0.116716	0.20911	0.188458
1700072B07Rik	RIKEN cDNA 1700072B07 gene	0	0	0
1700072O05Rik	RIKEN cDNA 1700072O05 gene	0	0	0.0471144
1700073E17Rik	RIKEN cDNA 1700073E17 gene	0	0	0
1700074H08Rik	RIKEN cDNA 1700074H08 gene	0	0	0
1700074P13Rik	RIKEN cDNA 1700074P13 gene	0	0	0
1700080E11Rik	RIKEN cDNA 1700080E11 gene	0	0	0
1700080N15Rik	RIKEN cDNA 1700080N15 gene	0	0	0
1700080O16Rik	RIKEN cDNA 1700080O16 gene	0	0	0
1700081H04Rik	RIKEN cDNA 1700081H04 gene	0	0	0
1700084C01Rik	RIKEN cDNA 1700084C01 gene	0.116716	0	0
1700084E18Rik	RIKEN cDNA 1700084E18 gene	0.116716	0.0522775	0.0942288
1700084F23Rik	RIKEN cDNA 1700084F23 gene	0	0	0
1700084J12Rik	RIKEN cDNA 1700084J12 gene	0	0	0
1700085C21Rik	RIKEN cDNA 1700085C21 gene	0	0	0
1700086L19Rik	RIKEN cDNA 1700086L19 gene	0	0	0
1700086O06Rik	RIKEN cDNA 1700086O06 gene	1.86746	1.1501	2.49706
1700088E04Rik	RIKEN cDNA 1700088E04 gene	0.408507	0.470497	0.895174
1700091H14Rik	RIKEN cDNA 1700091H14 gene	0	0.0522775	0
1700092C02Rik	RIKEN cDNA 1700092C02 gene	0	0	0
1700092C10Rik	RIKEN cDNA 1700092C10 gene	0	0	0
1700092E19Rik	RIKEN cDNA 1700092E19 gene	0	0	0
1700092K14Rik	RIKEN cDNA 1700092K14 gene	0	0.0522775	0
1700092M07Rik	RIKEN cDNA 1700092M07 gene	0.116716	0	0.0942288
1700093K21Rik	RIKEN cDNA 1700093K21 gene	0	0	0
1700094D03Rik	RIKEN cDNA 1700094D03 gene	2.39268	2.40476	3.76915
1700094J05Rik	RIKEN cDNA 1700094J05 gene	0	0	0
1700094M24Rik	RIKEN cDNA 1700094M24 gene	0	0	0
1700095A21Rik	RIKEN cDNA 1700095A21 gene	0	0	0.329801
1700095B10Rik	RIKEN cDNA 1700095B10 gene	0	0	0
1700096J18Rik	RIKEN cDNA 1700096J18 gene	0	0	0
1700096K18Rik	RIKEN cDNA 1700096K18 gene	0.583581	0.731884	0.848059
1700097N02Rik	RIKEN cDNA 1700097N02 gene	0	0	0
1700100L14Rik	RIKEN cDNA 1700100L14 gene	0	0	0
1700101E01Rik	RIKEN cDNA 1700101E01 gene	0.0583581	0.0522775	0.0471144
1700101I11Rik	RIKEN cDNA 1700101I11 gene	0	0.104555	0.141343
1700101O22Rik	RIKEN cDNA 1700101O22 gene	0	0	0
1700102H20Rik	RIKEN cDNA 1700102H20 gene	0.0583581	0.0522775	0.0471144
1700102P08Rik	RIKEN cDNA 1700102P08 gene	0.29179	0.0522775	0.141343
1700104L18Rik	RIKEN cDNA 1700104L18 gene	0	0	0
1700105P06Rik	RIKEN cDNA 1700105P06 gene	0.0583581	0.156832	0.141343
1700106J16Rik	NA	0	0	0
1700108F19Rik	RIKEN cDNA 1700108F19 gene	0.175074	0	0
1700108J01Rik	RIKEN cDNA 1700108J01 gene	0	0	0
1700109G14Rik	RIKEN cDNA 1700109G14 gene	0	0	0
1700109G15Rik	RIKEN cDNA 1700109G15 gene	0	0	0
1700109H08Rik	RIKEN cDNA 1700109H08 gene	0.233432	0	0.471144
1700109I08Rik	RIKEN cDNA 1700109I08 gene	0	0	0
1700109K24Rik	RIKEN cDNA 1700109K24 gene	3.67656	3.18893	2.44995
1700110C19Rik	RIKEN cDNA 1700110C19 gene	0	0	0
1700110I01Rik	RIKEN cDNA 1700110I01 gene	0.116716	0	0
1700110K17Rik	RIKEN cDNA 1700110K17 gene	0	0.0522775	0
1700111N16Rik	RIKEN cDNA 1700111N16 gene	0	0	0
1700112E06Rik	RIKEN cDNA 1700112E06 gene	0.408507	0.104555	0.188458
1700112H15Rik	RIKEN cDNA 1700112H15 gene	0	0.156832	0
1700112J05Rik	RIKEN cDNA 1700112J05 gene	0	0	0.141343
1700113A16Rik	RIKEN cDNA 1700113A16 gene	3.90999	3.76398	5.04124
1700113H08Rik	RIKEN cDNA 1700113H08 gene	0	0	0
1700119H24Rik	RIKEN cDNA 1700119H24 gene	0	0	0
1700120C14Rik	RIKEN cDNA 1700120C14 gene	0.116716	0.104555	0.141343
1700120E14Rik	RIKEN cDNA 1700120E14 gene	0	0	0
1700120G07Rik	RIKEN cDNA 1700120G07 gene	0	0	0
1700120K04Rik	RIKEN cDNA 1700120K04 gene	0.175074	0.104555	0.282686
1700121L16Rik	RIKEN cDNA 1700121L16 gene	0	0	0
1700121N20Rik	RIKEN cDNA 1700121N20 gene	0	0	0
1700122O11Rik	RIKEN cDNA 1700122O11 gene	0	0	0
1700123I01Rik	RIKEN cDNA 1700123I01 gene	0	0	0
1700123K08Rik	RIKEN cDNA 1700123K08 gene	0	0	0
1700123L14Rik	RIKEN cDNA 1700123L14 gene	0	0	0
1700123M08Rik	RIKEN cDNA 1700123M08 gene	0.233432	0.62733	0.75383
1700123O12Rik	RIKEN cDNA 1700123O12 gene	0	0	0
1700123O20Rik	RIKEN cDNA 1700123O20 gene	28.8872	25.25	18.8929
1700123O21Rik	RIKEN cDNA 1700123O21 gene	0	0	0
1700124L16Rik	RIKEN cDNA 1700124L16 gene	0	0.0522775	0.0471144
1700125G02Rik	RIKEN cDNA 1700125G02 gene	0	0	0
1700125G22Rik	RIKEN cDNA 1700125G22 gene	0	0	0
1700125H03Rik	RIKEN cDNA 1700125H03 gene	0.116716	0	0.0471144
1700125H20Rik	RIKEN cDNA 1700125H20 gene	0.0583581	0.156832	0
1700126H18Rik	RIKEN cDNA 1700126H18 gene	0	0	0
1700128A07Rik	RIKEN cDNA 1700128A07 gene	0	0	0
1700128F08Rik	RIKEN cDNA 1700128F08 gene	0.700297	1.98654	0.471144
1700129C05Rik	RIKEN cDNA 1700129C05 gene	0	0	0
1810006J02Rik	RIKEN cDNA 1810006J02 gene	0	0	0
1810007C17Rik	RIKEN cDNA 1810007C17 gene	0.0583581	0	0
1810007D17Rik	RIKEN cDNA 1810007D17 gene	0	0	0
1810008I18Rik	RIKEN cDNA 1810008I18 gene	0.0583581	0.104555	0
1810009A15Rik	RIKEN cDNA 1810009A15 gene	29.821	28.5958	46.0779
1810009J06Rik	RIKEN cDNA 1810009J06 gene	0	0	0
1810010D01Rik	RIKEN cDNA 1810010D01 gene	0.0583581	0.365942	0
1810010H24Rik	RIKEN cDNA 1810010H24 gene	0.29179	0.784162	0.471144
1810011H11Rik	RIKEN cDNA 1810011H11 gene	0.0583581	0	0
1810011O10Rik	RIKEN cDNA 1810011O10 gene	0.992087	3.92081	0
1810012K16Rik	RIKEN cDNA 1810012K16 gene	0	0.156832	0.0471144
1810013A23Rik	RIKEN cDNA 1810013A23 gene	0	0	0
1810013L24Rik	RIKEN cDNA 1810013L24 gene	80.6509	71.9861	71.4254
1810014B01Rik	RIKEN cDNA 1810014B01 gene	1.98417	1.1501	1.79035
1810018F18Rik	RIKEN cDNA 1810018F18 gene	0	0	0
1810019D21Rik	RIKEN cDNA 1810019D21 gene	0.233432	0.731884	0.376915
1810020O05Rik	Riken cDNA 1810020O05 gene	0	0	0
1810021B22Rik	RIKEN cDNA 1810021B22 gene	0.175074	0.365942	0.0471144
1810022K09Rik	RIKEN cDNA 1810022K09 gene	23.635	26.3478	36.7963
1810024B03Rik	RIKEN cDNA 1810024B03 gene	0.0583581	0.0522775	0
1810026B05Rik	RIKEN cDNA 1810026B05 gene	8.75371	10.7169	8.76328
1810026J23Rik	RIKEN cDNA 1810026J23 gene	53.2226	47.0497	36.3723
1810030O07Rik	RIKEN cDNA 1810030O07 gene	35.4817	38.7376	43.1568
1810032O08Rik	RIKEN cDNA 1810032O08 gene	10.6795	10.2464	8.24502
1810034E14Rik	RIKEN cDNA 1810034E14 gene	1.57567	1.41149	0.282686
1810037I17Rik	RIKEN cDNA 1810037I17 gene	41.7844	33.7712	57.2911
1810041L15Rik	RIKEN cDNA 1810041L15 gene	0.116716	3.03209	0
1810043G02Rik	RIKEN cDNA 1810043G02 gene	10.5045	8.10301	11.0719
1810043H04Rik	RIKEN cDNA 1810043H04 gene	5.01879	5.17547	7.96233
1810044D09Rik	RIKEN cDNA 1810044D09 gene	0.233432	0.104555	0.471144
1810046K07Rik	RIKEN cDNA 1810046K07 gene	0	0	0
1810053B23Rik	RIKEN cDNA 1810053B23 gene	0	0	0
1810055G02Rik	RIKEN cDNA 1810055G02 gene	61.9179	74.7045	44.7116
1810058I24Rik	RIKEN cDNA 1810058I24 gene	26.9031	23.6817	29.8234
1810062G17Rik	RIKEN cDNA 1810062G17 gene	1.05045	0.365942	0
1810062O18Rik	RIKEN cDNA 1810062O18 gene	0.116716	0.261387	0
1810064F22Rik	RIKEN cDNA 1810064F22 gene	0.29179	0.470497	0.376915
1810065E05Rik	RIKEN cDNA 1810065E05 gene	0	0	0
2010001E11Rik	RIKEN cDNA 2010001E11 gene	0.525223	0.784162	0.848059
2010002M12Rik	NA	0.525223	0.156832	0.235572
2010003K11Rik	RIKEN cDNA 2010003K11 gene	0	0	0
2010005H15Rik	RIKEN cDNA 2010005H15 gene	0	0	0
2010009K17Rik	RIKEN cDNA 2010009K17 gene	0.0583581	0.104555	0
2010010A06Rik	RIKEN cDNA 2010010A06 gene	0	0.0522775	0
2010012O05Rik	NA	5.25223	7.47568	22.8034
2010015L04Rik	NA	5.36894	5.3323	3.72204
2010016I18Rik	RIKEN cDNA 2010016I18 gene	0	0.104555	0.0471144
2010106C02Rik	RIKEN cDNA 2010106C02 gene	0	0	0
2010106E10Rik	RIKEN cDNA 2010106E10 gene	0	0	0
2010107E04Rik	RIKEN cDNA 2010107E04 gene	30.3462	30.6346	42.403
2010107G12Rik	RIKEN cDNA 2010107G12 gene	0.29179	0.0522775	0.141343
2010107G23Rik	RIKEN cDNA 2010107G23 gene	0.466865	0.731884	0
2010109A12Rik	RIKEN cDNA 2010109A12 gene	0	0	0
2010109I03Rik	RIKEN cDNA 2010109I03 gene	0.0583581	0	0.0471144
2010111I01Rik	RIKEN cDNA 2010111I01 gene	24.3937	40.4628	6.07776
2010204K13Rik	RIKEN cDNA 2010204K13 gene	2.39268	0.784162	1.74323
2010300C02Rik	RIKEN cDNA 2010300C02 gene	0	0	0
2010308F09Rik	RIKEN cDNA 2010308F09 gene	0	0	0
2010310C07Rik	RIKEN cDNA 2010310C07 gene	0	0.0522775	0.0942288
2010315B03Rik	RIKEN cDNA 2010315B03 gene	7.17804	7.94617	10.6007
2010320M18Rik	RIKEN cDNA 2010320M18 gene	4.43521	4.75725	3.43935
2200002D01Rik	RIKEN cDNA 2200002D01 gene	9.7458	6.01191	5.79507
2200002J24Rik	RIKEN cDNA 2200002J24 gene	0	0	0
2210010C04Rik	RIKEN cDNA 2210010C04 gene	0	0	0
2210011C24Rik	RIKEN cDNA 2210011C24 gene	0.0583581	0	0
2210013O21Rik	RIKEN cDNA 2210013O21 gene	22.9931	26.1387	18.7044
2210015D19Rik	RIKEN cDNA 2210015D19 gene	3.6182	4.70497	9.37577
2210016F16Rik	RIKEN cDNA 2210016F16 gene	15.3482	9.35767	0.895174
2210016L21Rik	RIKEN cDNA 2210016L21 gene	16.1652	16.3106	14.1814
2210018M11Rik	RIKEN cDNA 2210018M11 gene	52.5223	38.5285	37.4088
2210019I11Rik	RIKEN cDNA 2210019I11 gene	0	0	0
2210039B01Rik	RIKEN cDNA 2210039B01 gene	0.525223	1.35921	0.800945
2210404O09Rik	RIKEN cDNA 2210404O09 gene	6.06924	5.3323	5.32393
2210407C18Rik	RIKEN cDNA 2210407C18 gene	0	0	0
2210408F21Rik	RIKEN cDNA 2210408F21 gene	0.583581	1.93427	2.16726
2210408I21Rik	RIKEN cDNA 2210408I21 gene	2.85955	4.23447	3.34512
2210409D07Rik	RIKEN cDNA 2210409D07 gene	0	0	0
2210409E12Rik	RIKEN cDNA 2210409E12 gene	0	0.0522775	0
2210414B05Rik	RIKEN cDNA 2210414B05 gene	0	0	0
2210416O15Rik	RIKEN cDNA 2210416O15 gene	0.233432	0.313665	0.282686
2210417A02Rik	RIKEN cDNA 2210417A02 gene	0	0	0
2210420H20Rik	RIKEN cDNA 2210420H20 gene	0	0	0
2300002M23Rik	RIKEN cDNA 2300002M23 gene	0	0	0
2300003K06Rik	RIKEN cDNA 2300003K06 gene	0	0	0
2300005B03Rik	RIKEN cDNA 2300005B03 gene	0	0	0
2300009A05Rik	RIKEN cDNA 2300009A05 gene	2.33432	1.67288	2.40283
2310001H17Rik	RIKEN cDNA 2310001H17 gene	0.233432	0.679607	0.471144
2310001K24Rik	RIKEN cDNA 2310001K24 gene	0	0	0
2310002D06Rik	RIKEN cDNA 2310002D06 gene	0	0	0
2310002F09Rik	RIKEN cDNA 2310002F09 gene	0	0.261387	4.19318
2310002J15Rik	NA	0	0	0
2310002L09Rik	RIKEN cDNA 2310002L09 gene	0	0	0
2310003H01Rik	NA	16.2819	12.1806	19.8352
2310005A03Rik	RIKEN cDNA 2310005A03 gene	0	0	0
2310005E17Rik	RIKEN cDNA 2310005E17 gene	0.0583581	0.0522775	0
2310005G13Rik	NA	0.0583581	0.0522775	0
2310007B03Rik	RIKEN cDNA 2310007B03 gene	0	0	0.0471144
2310007L24Rik	NA	0	0	0
2310008N11Rik	RIKEN cDNA 2310008N11 gene	0.175074	0.731884	0.0942288
2310009A05Rik	RIKEN cDNA 2310009A05 gene	3.26805	1.72516	2.82686
2310009B15Rik	RIKEN cDNA 2310009B15 gene	4.37686	5.07091	9.89402
2310010J17Rik	RIKEN cDNA 2310010J17 gene	0.116716	0.313665	0.329801
2310011J03Rik	RIKEN cDNA 2310011J03 gene	31.2216	24.9886	23.5572
2310014L17Rik	NA	1.75074	1.93427	0.848059
2310015A10Rik	RIKEN cDNA 2310015A10 gene	1.51731	4.70497	11.4488
2310015B20Rik	NA	0	0.0522775	0
2310015D24Rik	RIKEN cDNA 2310015D24 gene	0	0	0.0942288
2310016D03Rik	RIKEN cDNA 2310016D03 gene	0	0	0
2310020H05Rik	RIKEN cDNA 2310020H05 gene	0	0	0
2310022A10Rik	RIKEN cDNA 2310022A10 gene	18.5579	13.5921	15.5478
2310022B05Rik	RIKEN cDNA 2310022B05 gene	161.068	199.073	365.702
2310030A07Rik	RIKEN cDNA 2310030A07 gene	0.0583581	0	0
2310030G06Rik	RIKEN cDNA 2310030G06 gene	1.1088	1.1501	0.141343
2310033P09Rik	RIKEN cDNA 2310033P09 gene	5.77745	7.37112	9.09308
2310034C09Rik	RIKEN cDNA 2310034C09 gene	0	0	0
2310034G01Rik	RIKEN cDNA 2310034G01 gene	0.175074	0.104555	0.612487
2310034O05Rik	RIKEN cDNA 2310034O05 gene	0	0	0.0471144
2310035C23Rik	RIKEN cDNA 2310035C23 gene	41.9595	52.0161	81.0368
2310036O22Rik	RIKEN cDNA 2310036O22 gene	163.111	161.276	55.5008
2310039H08Rik	RIKEN cDNA 2310039H08 gene	5.36894	4.65269	9.98825
2310039L15Rik	RIKEN cDNA 2310039L15 gene	0.700297	1.30694	2.63841
2310040G24Rik	RIKEN cDNA 2310040G24 gene	0.116716	0	0.0942288
2310042E22Rik	NA	0	0	0
2310043L19Rik	RIKEN cDNA 2310043L19 gene	0	0	0
2310043O21Rik	RIKEN cDNA 2310043O21 gene	0	0	0
2310045N01Rik	NA	8.92879	15.3173	9.61134
2310047M10Rik	NA	10.8546	11.6579	13.3334
2310050C09Rik	RIKEN cDNA 2310050C09 gene	0	0	0
2310057J18Rik	RIKEN cDNA 2310057J18 gene	0	0	0
2310057M21Rik	RIKEN cDNA 2310057M21 gene	12.9555	12.5466	11.0719
2310057N15Rik	RIKEN cDNA 2310057N15 gene	0	0	0
2310061I04Rik	RIKEN cDNA 2310061I04 gene	12.8388	12.1284	15.3593
2310061J03Rik	NA	1.63403	0.784162	0.848059
2310061N02Rik	RIKEN cDNA 2310061N02 gene	0	0	0
2310065F04Rik	RIKEN cDNA 2310065F04 gene	0	0	0
2310067B10Rik	RIKEN cDNA 2310067B10 gene	34.1978	21.5383	46.9731
2310068J16Rik	RIKEN cDNA 2310068J16 gene	0.758655	0.522775	0.800945
2310069B03Rik	RIKEN cDNA 2310069B03 gene	0	0	0.0471144
2310069G16Rik	RIKEN cDNA 2310069G16 gene	0	0.313665	0
2310079G19Rik	RIKEN cDNA 2310079G19 gene	0	0	0
2310081J21Rik	RIKEN cDNA 2310081J21 gene	0	0.62733	0
2410002F23Rik	RIKEN cDNA 2410002F23 gene	46.0445	61.6874	43.4866
2410003L11Rik	RIKEN cDNA 2410003L11 gene	0	0	0
2410004B18Rik	RIKEN cDNA 2410004B18 gene	14.2977	9.88044	8.10368
2410004I01Rik	RIKEN cDNA 2410004I01 gene	0	0	0
2410004N09Rik	NA	5.66073	6.58696	9.09308
2410004P03Rik	RIKEN cDNA 2410004P03 gene	0.0583581	0.365942	0.282686
2410006H16Rik	RIKEN cDNA 2410006H16 gene	35.7151	64.7718	61.3901
2410007B07Rik	NA	0	0	0
2410012E07Rik	RIKEN cDNA 2410012E07 gene	0	0	0.42403
2410012M07Rik	NA	0	0	0
2410015M20Rik	RIKEN cDNA 2410015M20 gene	26.8447	29.589	27.0437
2410016O06Rik	RIKEN cDNA 2410016O06 gene	20.6588	15.1605	11.2603
2410017I17Rik	RIKEN cDNA 2410017I17 gene	0	0	0
2410018L13Rik	RIKEN cDNA 2410018L13 gene	2.9179	5.54141	8.33925
2410021H03Rik	RIKEN cDNA 2410021H03 gene	0.583581	0.470497	0.989402
2410076I21Rik	NA	0.116716	0.156832	0.329801
2410088K16Rik	NA	0	0.0522775	0
2410089E03Rik	RIKEN cDNA 2410089E03 gene	122.61	98.8567	118.681
2410114N07Rik	NA	0	0	0
2410124H12Rik	RIKEN cDNA 2410124H12 gene	0	0	0
2410127L17Rik	NA	42.543	38.4762	49.5172
2410131K14Rik	RIKEN cDNA 2410131K14 gene	12.3136	12.9125	10.5065
2410137M14Rik	RIKEN cDNA 2410137M14 gene	0	0	0
2410141K09Rik	RIKEN cDNA 2410141K09 gene	0.0583581	0.41822	0.188458
2500004C02Rik	RIKEN cDNA 2500004C02 gene	2.97626	2.87526	1.93169
2510002D24Rik	RIKEN cDNA 2510002D24 gene	6.59446	3.55487	6.12487
2510003E04Rik	NA	37.2325	35.8623	39.1521
2510009E07Rik	RIKEN cDNA 2510009E07 gene	35.9486	26.9752	0.376915
2510039O18Rik	RIKEN cDNA 2510039O18 gene	55.4402	61.6351	46.549
2510049J12Rik	NA	0.116716	0.0522775	0
2610001J05Rik	RIKEN cDNA 2610001J05 gene	27.545	42.8152	43.1097
2610002J02Rik	NA	14.1227	20.7019	9.09308
2610002M06Rik	RIKEN cDNA 2610002M06 gene	19.0831	23.4203	25.0649
2610005L07Rik	RIKEN cDNA 2610005L07 gene	60.8091	121.754	133.899
2610008E11Rik	RIKEN cDNA 2610008E11 gene	29.5875	89.8127	45.1827
2610015P09Rik	RIKEN cDNA 2610015P09 gene	6.5361	3.92081	5.74796
2610016A17Rik	RIKEN cDNA 2610016A17 gene	0	0	0
2610018G03Rik	NA	0.29179	0	0.0942288
2610020C07Rik	RIKEN cDNA 2610020C07 gene	2.85955	0.784162	3.48647
2610020H08Rik	RIKEN cDNA 2610020H08 gene	4.78536	3.81625	6.64313
2610027K06Rik	RIKEN cDNA 2610027K06 gene	0.0583581	0.104555	0.188458
2610028E06Rik	RIKEN cDNA 2610028E06 gene	0.0583581	0	0
2610028H24Rik	RIKEN cDNA 2610028H24 gene	0	0	0
2610034B18Rik	NA	36.999	39.5218	26.3369
2610034M16Rik	NA	0	0	0
2610035D17Rik	RIKEN cDNA 2610035D17 gene	1.86746	1.1501	1.22497
2610035F20Rik	RIKEN cDNA 2610035F20 gene	0	0	0
2610037D02Rik	RIKEN cDNA 2610037D02 gene	0	0	0.565373
2610044O15Rik8	RIKEN cDNA 2610044O15 gene	6.41939	8.36439	9.09308
2610100L16Rik	RIKEN cDNA 2610100L16 gene	0	0	0
2610203C20Rik	RIKEN cDNA 2610203C20 gene	108.021	132.262	222.851
2610203C22Rik	RIKEN cDNA 2610203C22 gene	0	0.365942	0.376915
2610206C17Rik	RIKEN cDNA 2610206C17 gene	0	0	0.0471144
2610207O16Rik	NA	0	0	0
2610301B20Rik	RIKEN cDNA 2610301B20 gene	9.51237	9.72361	18.6573
2610305D13Rik	RIKEN cDNA 2610305D13 gene	1.57567	0.365942	14.1343
2610306M01Rik	RIKEN cDNA 2610306M01 gene	1.28388	1.25466	2.87398
2610307P16Rik	RIKEN cDNA 2610307P16 gene	0.175074	0.940994	2.82686
2610316D01Rik	RIKEN cDNA 2610316D01 gene	0	0	0
2610318N02Rik	RIKEN cDNA 2610318N02 gene	0.408507	0.0522775	3.25089
2610507B11Rik	RIKEN cDNA 2610507B11 gene	217.676	390.042	265.348
2610507I01Rik	RIKEN cDNA 2610507I01 gene	14.4144	16.4674	13.0036
2610524H06Rik	RIKEN cDNA 2610524H06 gene	7.99506	5.38458	2.96821
2610528A11Rik	RIKEN cDNA 2610528A11 gene	0.758655	0	0.0942288
2610528J11Rik	RIKEN cDNA 2610528J11 gene	0	0	0
2700029M09Rik	RIKEN cDNA 2700029M09 gene	44.7606	27.9162	25.0177
2700038G22Rik	RIKEN cDNA 2700038G22 gene	5.4273	5.17547	8.48059
2700046A07Rik	RIKEN cDNA 2700046A07 gene	0	0	0
2700046G09Rik	RIKEN cDNA 2700046G09 gene	0.408507	0.940994	1.60189
2700049A03Rik	RIKEN cDNA 2700049A03 gene	27.6034	20.0223	23.2745
2700054A10Rik	RIKEN cDNA 2700054A10 gene	1.63403	5.22775	6.17199
2700060E02Rik	RIKEN cDNA 2700060E02 gene	94.5401	122.172	87.303
2700062C07Rik	RIKEN cDNA 2700062C07 gene	9.22058	9.56678	9.56422
2700069I18Rik	RIKEN cDNA 2700069I18 gene	1.22552	0.940994	0.565373
2700070H01Rik	RIKEN cDNA 2700070H01 gene	0.175074	0.0522775	0.0942288
2700081O15Rik	RIKEN cDNA 2700081O15 gene	52.9308	56.0937	76.5609
2700086A05Rik	NA	1.16716	0.0522775	0.42403
2700089E24Rik	NA	77.908	62.9943	85.7482
2700089I24Rik	RIKEN cDNA 2700089I24 gene	0	0.104555	0
2700094K13Rik	RIKEN cDNA 2700094K13 gene	77.2077	48.5658	51.873
2700097O09Rik	RIKEN cDNA 2700097O09 gene	4.3185	3.03209	4.42875
2700099C18Rik	RIKEN cDNA 2700099C18 gene	9.10386	6.43013	7.06716
2810001G20Rik	RIKEN cDNA 2810001G20 gene	3.96835	2.87526	4.19318
2810002D19Rik	RIKEN cDNA 2810002D19 gene	3.73492	2.82298	5.18258
2810004N23Rik	RIKEN cDNA 2810004N23 gene	22.9931	30.6869	31.9436
2810006K23Rik	RIKEN cDNA 2810006K23 gene	7.2364	7.73706	7.34985
2810007J24Rik	NA	0	0	0
2810008D09Rik	NA	3.09298	2.35249	7.06716
2810013P06Rik	RIKEN cDNA 2810013P06 gene	2.5094	3.2412	7.58542
2810021J22Rik	RIKEN cDNA 2810021J22 gene	8.28685	8.99172	7.5383
2810025M15Rik	RIKEN cDNA 2810025M15 gene	19.725	9.25311	13.7574
2810029C07Rik	RIKEN cDNA 2810029C07 gene	0.933729	0.575052	1.13075
2810032G03Rik	RIKEN cDNA 2810032G03 gene	0.116716	0.313665	1.74323
2810047C21Rik1	RIKEN cDNA 2810047C21 gene 1	0.116716	0.575052	5.04124
2810049E08Rik	RIKEN cDNA 2810049E08 gene	0	0	0.0471144
2810055G20Rik	NA	0.408507	0.470497	0.0471144
2810403A07Rik	RIKEN cDNA 2810403A07 gene	57.4827	42.2925	65.065
2810403D21Rik	RIKEN cDNA 2810403D21 gene	0.408507	0.156832	0.42403
2810404M03Rik	RIKEN cDNA 2810404M03 gene	0	0	0
2810405F15Rik	RIKEN cDNA 2810405F15 gene	0.233432	0.679607	0.141343
2810408A11Rik	RIKEN cDNA 2810408A11 gene	1.16716	1.35921	0.848059
2810408I11Rik	RIKEN cDNA 2810408I11 gene	3.44313	1.72516	4.33452
2810408M09Rik	NA	17.0989	13.4353	12.0142
2810410L24Rik	RIKEN cDNA 2810410L24 gene	2.15925	1.30694	0.942288
2810417H13Rik	RIKEN cDNA 2810417H13 gene	229.055	116.788	42.1674
2810428I15Rik	RIKEN cDNA 2810428I15 gene	22.1761	20.7542	18.8458
2810429I04Rik	RIKEN cDNA 2810429I04 gene	0.116716	0	0
2810433D01Rik	RIKEN cDNA 2810433D01 gene	0.466865	0.575052	0.612487
2810442I21Rik	NA	2.10089	1.88199	1.93169
2810442N19Rik	RIKEN cDNA 2810442N19 gene	0.116716	0.20911	0.0942288
2810454H06Rik	RIKEN cDNA 2810454H06 gene	0.700297	0.261387	0.848059
2810459M11Rik	RIKEN cDNA 2810459M11 gene	0	0	0
2810468N07Rik	RIKEN cDNA 2810468N07 gene	0.408507	0	0
2810471M01Rik	RIKEN cDNA 2810471M01 gene	0	0	0.0942288
2810474O19Rik	RIKEN cDNA 2810474O19 gene	60.2255	87.4079	92.6269
2900005J15Rik	RIKEN cDNA 2900005J15 gene	1.8091	1.88199	0
2900008C10Rik	RIKEN cDNA 2900008C10 gene	0	0.41822	0.0471144
2900009J06Rik	RIKEN cDNA 2900009J06 gene	0.175074	0.104555	0.706716
2900011O08Rik	RIKEN cDNA 2900011O08 gene	0.408507	0.156832	0
2900026A02Rik	RIKEN cDNA 2900026A02 gene	90.9802	46.0042	0.0471144
2900041M22Rik	RIKEN cDNA 2900041M22 gene	0.0583581	0.470497	0
2900052N01Rik	RIKEN cDNA 2900052N01 gene	0	0	0
2900055J20Rik	RIKEN cDNA 2900055J20 gene	0	0	0
2900056M20Rik	NA	7.58655	8.20756	12.7209
2900057B20Rik	RIKEN cDNA 2900057B20 gene	0	0	0
2900060B14Rik	RIKEN cDNA 2900060B14 gene	0	0.20911	0
2900076A07Rik	RIKEN cDNA 2900076A07 gene	0.466865	1.04555	0.612487
2900079G21Rik	RIKEN cDNA 2900079G21 gene	0	0	0
2900092C05Rik	RIKEN cDNA 2900092C05 gene	0	0.0522775	0
2900092D14Rik	RIKEN cDNA 2900092D14 gene	0	0	0
2900097C17Rik	RIKEN cDNA 2900097C17 gene	351.141	307.496	301.768
3000002C10Rik	RIKEN cDNA 3000002C10 gene	2.15925	2.87526	1.08363
3010001F23Rik	RIKEN cDNA 3010001F23 gene	0.175074	0.104555	0.329801
3010026O09Rik	RIKEN cDNA 3010026O09 gene	4.26014	2.82298	1.88458
3010033K07Rik	NA	0	0	0
3100003L05Rik	RIKEN cDNA 3100003L05 gene	0	0	0
3110001I22Rik	RIKEN cDNA 3110001I22 gene	2.62611	2.40476	1.649
3110002H16Rik	RIKEN cDNA 3110002H16 gene	19.6083	15.0559	20.6361
3110007F17Rik	NA	0.992087	1.30694	0
3110009E18Rik	RIKEN cDNA 3110009E18 gene	0.466865	1.25466	0.989402
3110009F21Rik	RIKEN cDNA 3110009F21 gene	0.0583581	0.0522775	0.188458
3110015C05Rik	RIKEN cDNA 3110015C05 gene	0	0	0
3110021A11Rik	RIKEN cDNA 3110021A11 gene	0.233432	0.20911	0.235572
3110021N24Rik	RIKEN cDNA 3110021N24 gene	3.6182	3.03209	3.81627
3110035E14Rik	RIKEN cDNA 3110035E14 gene	0	0	0.0471144
3110039I08Rik	RIKEN cDNA 3110039I08 gene	0.175074	0.0522775	0.141343
3110039M20Rik	RIKEN cDNA 3110039M20 gene	5.77745	3.29348	12.4382
3110040N11Rik	RIKEN cDNA 3110040N11 gene	3.73492	9.61905	5.51238
3110043O21Rik	RIKEN cDNA 3110043O21 gene	11.1464	16.6765	26.5254
3110045C21Rik	RIKEN cDNA 3110045C21 gene	1.1088	0.313665	0.0471144
3110052M02Rik	RIKEN cDNA 3110052M02 gene	0.933729	4.44358	7.58542
3110056K07Rik	RIKEN cDNA 3110056K07 gene	1.92582	1.35921	2.63841
3110057O12Rik	RIKEN cDNA 3110057O12 gene	2.62611	2.0911	7.77388
3110062M04Rik	RIKEN cDNA 3110062M04 gene	9.7458	5.22775	12.768
3110070M22Rik	RIKEN cDNA 3110070M22 gene	0.525223	0.522775	0.518258
3110079O15Rik	RIKEN cDNA 3110079O15 gene	0	0	0.0471144
3110082I17Rik	RIKEN cDNA 3110082I17 gene	13.0722	11.6579	13.5218
3110082J24Rik	RIKEN cDNA 3110082J24 gene	0.116716	0	0.0471144
3110099E03Rik	RIKEN cDNA 3110099E03 gene	0.0583581	0.104555	0
3200001D21Rik	RIKEN cDNA 3200001D21 gene	0.0583581	0	0.141343
3300002I08Rik	RIKEN cDNA 3300002I08 gene	1.1088	0.679607	0.895174
3300005D01Rik	RIKEN cDNA 3300005D01 gene	2.33432	14.1149	30.6715
3425401B19Rik	RIKEN cDNA 3425401B19 gene	0	0.0522775	0
3632451O06Rik	RIKEN cDNA 3632451O06 gene	0.0583581	0	0.0471144
3632454L22Rik	RIKEN cDNA 3632454L22 gene	0	0.522775	0.0471144
3830403N18Rik	RIKEN cDNA 3830403N18 gene	0.175074	0.156832	2.02592
3830406C13Rik	RIKEN cDNA 3830406C13 gene	14.5312	16.4674	15.218
3830408C21Rik	RIKEN cDNA 3830408C21 gene	0.992087	0.940994	1.60189
3830417A13Rik	RIKEN cDNA 3830417A13 gene	0	0	0
3930402G23Rik	RIKEN cDNA 3930402G23 gene	0.116716	0.836439	0.706716
4430402I18Rik	RIKEN cDNA 4430402I18 gene	0.116716	0.104555	0.0942288
4631405J19Rik	RIKEN cDNA 4631405J19 gene	0.175074	0	0.0942288
4632415L05Rik	RIKEN cDNA 4632415L05 gene	14.181	14.8468	20.4476
4632427E13Rik	RIKEN cDNA 4632427E13 gene	0.641939	1.04555	0.612487
4632428C04Rik	RIKEN cDNA 4632428C04 gene	0.116716	0.0522775	0
4632428N05Rik	RIKEN cDNA 4632428N05 gene	1.63403	5.8028	2.07303
4632434I11Rik	NA	45.6944	31.9938	28.9754
4732416N19Rik	RIKEN cDNA 4732416N19 gene	0.116716	0	0
4732456N10Rik	RIKEN cDNA 4732456N10 gene	0.0583581	0	0
4732471J01Rik	RIKEN cDNA 4732471J01 gene	0.233432	1.35921	0.942288
4732490B19Rik	RIKEN cDNA 4732490B19 gene	0	0	0
4732491K20Rik	RIKEN cDNA 4732491K20 gene	0.817013	0.522775	1.22497
4831440E17Rik	RIKEN cDNA 4831440E17 gene	0.875371	0.940994	0.942288
4833403I15Rik	NA	0.116716	0.0522775	0.235572
4833411C07Rik	RIKEN cDNA 4833411C07 gene	0	0	0
4833412C05Rik	RIKEN cDNA 4833412C05 gene	0.116716	1.35921	0.0471144
4833417C18Rik	RIKEN cDNA 4833417C18 gene	0.175074	0.365942	0.329801
4833418N02Rik	RIKEN cDNA 4833418N02 gene	0.758655	0.156832	1.22497
4833419F23Rik	RIKEN cDNA 4833419F23 gene	0.0583581	0.20911	0.282686
4833420G17Rik	RIKEN cDNA 4833420G17 gene	26.4946	25.616	28.8811
4833422C13Rik	RIKEN cDNA 4833422C13 gene	0	0.261387	0.0942288
4833423E24Rik	RIKEN cDNA 4833423E24 gene	0	0	0
4833424O15Rik	NA	0	0	0
4833427F10Rik	RIKEN cDNA 4833427F10 gene	0.350148	0.104555	0.0471144
4833427G06Rik	RIKEN cDNA 4833427G06 gene	1.40059	2.30021	8.05656
4833428L15Rik	RIKEN cDNA 4833428L15 gene	0	0	0
4833439L19Rik	RIKEN cDNA 4833439L19 gene	69.0376	86.2578	69.8707
4921501E09Rik	RIKEN cDNA 4921501E09 gene	0	0	0
4921504A21Rik	RIKEN cDNA 4921504A21 gene	0.29179	0	0.706716
4921504E06Rik	RIKEN cDNA 4921504E06 gene	0	0	0
4921506M07Rik	RIKEN cDNA 4921506M07 gene	0	0	0
4921507L20Rik	RIKEN cDNA 4921507L20 gene	0.466865	0.313665	0.282686
4921507P07Rik	RIKEN cDNA 4921507P07 gene	0.0583581	0	0
4921508D12Rik	RIKEN cDNA 4921508D12 gene	0	0	0
4921509C19Rik	RIKEN cDNA 4921509C19 gene	0	0.0522775	0
4921509O07Rik	RIKEN cDNA 4921509O07 gene	0	0	0
4921511C10Rik	RIKEN cDNA 4921511C10 gene	0.0583581	0.104555	0
4921511C20Rik	RIKEN cDNA 4921511C20 gene	0	0	0
4921511H03Rik	RIKEN cDNA 4921511H03 gene	0	0	0
4921511I17Rik	RIKEN cDNA 4921511I17 gene	0	0	0
4921511M17Rik	RIKEN cDNA 4921511M17 gene	0	0	0
4921513I03Rik	RIKEN cDNA 4921513I03 gene	0.116716	0.731884	0.188458
4921515E04Rik	RIKEN cDNA 4921515E04 gene	0.29179	0.0522775	0.282686
4921517D22Rik	RIKEN cDNA 4921517D22 gene	0.29179	0.679607	0.0942288
4921524J17Rik	RIKEN cDNA 4921524J17 gene	34.6063	62.0011	12.3911
4921524L21Rik	RIKEN cDNA 4921524L21 gene	0	0	0
4921525O09Rik	RIKEN cDNA 4921525O09 gene	0	0	0
4921529L05Rik	RIKEN cDNA 4921529L05 gene	0	0	0
4921530L21Rik	RIKEN cDNA 4921530L21 gene	0	0	0
4921531C22Rik	RIKEN cDNA 4921531C22 gene	1.51731	1.35921	1.27209
4921531P14Rik	RIKEN cDNA 4921531P14 gene	0	0	0
4921533I20Rik	Riken cDNA 4921533I20 gene	0	0	0
4921534H16Rik	RIKEN cDNA 4921534H16 gene	0	0	0
4921536K21Rik	RIKEN cDNA 4921536K21 gene	0.525223	0.470497	0.471144
4921539E11Rik	RIKEN cDNA 4921539E11 gene	0	0	0
4922502D21Rik	RIKEN cDNA 4922502D21 gene	0	0	0
4922502H24Rik	RIKEN cDNA 4922502H24 gene	0	0	0
4922502N22Rik	RIKEN cDNA 4922502N22 gene	0	0	0
4930401C15Rik	RIKEN cDNA 4930401C15 gene	0	0	0
4930401O10Rik	RIKEN cDNA 4930401O10 gene	0	0	0
4930401O12Rik	RIKEN cDNA 4930401O12 gene	0	0	0
4930402F06Rik	RIKEN cDNA 4930402F06 gene	0	0.0522775	0
4930402F11Rik	RIKEN cDNA 4930402F11 gene	0	0	0
4930402H24Rik	RIKEN cDNA 4930402H24 gene	38.2245	61.792	137.009
4930402K13Rik	RIKEN cDNA 4930402K13 gene	0	0	0
4930404A05Rik	RIKEN cDNA 4930404A05 gene	0.0583581	0	0
4930404A10Rik	NA	0	0	0.0471144
4930404H11Rik	RIKEN cDNA 4930404H11 gene	0	0	0
4930404I05Rik	RIKEN cDNA 4930404I05 gene	0.758655	0.20911	0.612487
4930404N11Rik	RIKEN cDNA 4930404N11 gene	2.04253	1.20238	1.03652
4930405A10Rik	RIKEN cDNA 4930405A10 gene	0	0	0
4930405A21Rik	RIKEN cDNA 4930405A21 gene	0.175074	0.20911	0.188458
4930405D11Rik	RIKEN cDNA 4930405D11 gene	0	0	0
4930405J17Rik	RIKEN cDNA 4930405J17 gene	0	0	0
4930405L22Rik	RIKEN cDNA 4930405L22 gene	0	0	0
4930406D18Rik	RIKEN cDNA 4930406D18 gene	0	0	0
4930407I10Rik	RIKEN cDNA 4930407I10 gene	0	0	0
4930412B13Rik	RIKEN cDNA 4930412B13 gene	0	0	0
4930412C18Rik	RIKEN cDNA 4930412C18 gene	0	0.62733	0
4930412D23Rik	NA	0	0	0
4930412O13Rik	RIKEN cDNA 4930412O13 gene	0	0	0
4930413E15Rik	RIKEN cDNA 4930413E15 gene	0	0	0
4930413F20Rik	RIKEN cDNA 4930413F20 gene	0	0	0
4930413G21Rik	RIKEN cDNA 4930413G21 gene	7.35312	5.90735	6.17199
4930413M19Rik	RIKEN cDNA 4930413M19 gene	0	0	0
4930414L22Rik	NA	1.92582	1.82971	4.47587
4930414N06Rik	RIKEN cDNA 4930414N06 gene	0	0	0.141343
4930415F15Rik	RIKEN cDNA 4930415F15 gene	0	0.104555	0
4930415L06Rik	RIKEN cDNA 4930415L06 gene	0	0	0
4930415O20Rik	RIKEN cDNA 4930415O20 gene	0.175074	0.20911	0.0942288
4930417O13Rik	RIKEN cDNA 4930417O13 gene	0	0	0
4930417O22Rik	RIKEN cDNA 4930417O22 gene	0	0	0
4930419G24Rik	RIKEN cDNA 4930419G24 gene	0	0	0
4930423M02Rik	RIKEN cDNA 4930423M02 gene	0	0	0.0471144
4930425K10Rik	RIKEN cDNA 4930425K10 gene	0	0	0
4930425O10Rik	RIKEN cDNA 4930425O10 gene	0.0583581	0	0
4930426D05Rik	RIKEN cDNA 4930426D05 gene	0	0	0
4930426L09Rik	RIKEN cDNA 4930426L09 gene	0.700297	2.30021	0.42403
4930427A07Rik	RIKEN cDNA 4930427A07 gene	29.5875	20.0223	10.5536
4930428D18Rik	NA	0	0	0
4930428E07Rik	RIKEN cDNA 4930428E07 gene	0	0	0
4930428G15Rik	RIKEN cDNA 4930428G15 gene	0	0	0
4930428O21Rik	RIKEN cDNA 4930428O21 gene	0.0583581	0	0.0471144
4930429B21Rik	RIKEN cDNA 4930429B21 gene	3.73492	7.21429	2.02592
4930429D17Rik	RIKEN cDNA 4930429D17 gene	0	0	0
4930429F11Rik	RIKEN cDNA 4930429F11 gene	0	0	0
4930429F24Rik	RIKEN cDNA 4930429F24 gene	0.0583581	0	0
4930430A15Rik	RIKEN cDNA 4930430A15 gene	0	0	0
4930430D24Rik	NA	0	0	0
4930430F08Rik	RIKEN cDNA 4930430F08 gene	11.2047	10.2987	17.6208
4930430F21Rik	RIKEN cDNA 4930430F21 gene	0	0	0
4930430J02Rik	RIKEN cDNA 4930430J02 gene	0	0	0
4930431F12Rik	RIKEN cDNA 4930431F12 gene	0.817013	1.09783	1.08363
4930431P03Rik	RIKEN cDNA 4930431P03 gene	0	1.35921	0.0942288
4930432J09Rik	RIKEN cDNA 4930432J09 gene	0	0	0
4930432K21Rik	RIKEN cDNA 4930432K21 gene	1.1088	1.04555	3.58069
4930432M17Rik	RIKEN cDNA 4930432M17 gene	0	0	0
4930433B08Rik	RIKEN cDNA 4930433B08 gene	0	0	0
4930433I11Rik	RIKEN cDNA 4930433I11 gene	0	0	0
4930433N12Rik	RIKEN cDNA 4930433N12 gene	0	0	0
4930434J06Rik	RIKEN cDNA 4930434J06 gene	0	0	0
4930435E12Rik	RIKEN cDNA 4930435E12 gene	0	0	0
4930438E09Rik	RIKEN cDNA 4930438E09 gene	0	0	0
4930440C22Rik	RIKEN cDNA 4930440C22 gene	0	0	0
4930440I19Rik	RIKEN cDNA 4930440I19 gene	0	0	0
4930441J16Rik	RIKEN cDNA 4930441J16 gene	0	0	0
4930442J19Rik	RIKEN cDNA 4930442J19 gene	0	0	0
4930442L01Rik	RIKEN cDNA 4930442L01 gene	0	0	0
4930443O20Rik	RIKEN cDNA 4930443O20 gene	0.116716	0.20911	0.0942288
4930444F02Rik	RIKEN cDNA 4930444F02 gene	0	0	0
4930444G20Rik	RIKEN cDNA 4930444G20 gene	0.350148	0.261387	0
4930444M15Rik	RIKEN cDNA 4930444M15 gene	0	0	0
4930444P10Rik	RIKEN cDNA 4930444P10 gene	0	0	0
4930447A16Rik	RIKEN cDNA 4930447A16 gene	0	0	0
4930447C04Rik	RIKEN cDNA 4930447C04 gene	0.0583581	0.0522775	0
4930447J18Rik	RIKEN cDNA 4930447J18 gene	0	0	0
4930447K03Rik	RIKEN cDNA 4930447K03 gene	0	0.104555	0.0471144
4930447N08Rik	RIKEN cDNA 4930447N08 gene	0	0	0
4930448C13Rik	RIKEN cDNA 4930448C13 gene	0	0	0
4930448F12Rik	RIKEN cDNA 4930448F12 gene	0	0	0
4930448H16Rik	RIKEN cDNA 4930448H16 gene	0	0	0
4930448I06Rik	RIKEN cDNA 4930448I06 gene	0	0	0
4930448I18Rik	RIKEN cDNA 4930448I18 gene	0	0	0
4930448K20Rik	RIKEN cDNA 4930448K20 gene	0	0	0
4930449E01Rik	RIKEN cDNA 4930449E01 gene	0	0	0
4930449E18Rik	RIKEN cDNA 4930449E18 gene	0	0	0
4930449I24Rik	RIKEN cDNA 4930449I24 gene	0	0	0
4930451C15Rik	NA	0.0583581	0.156832	0.141343
4930451G09Rik	RIKEN cDNA 4930451G09 gene	0.233432	0.156832	0.942288
4930451I11Rik	RIKEN cDNA 4930451I11 gene	0	0	0
4930452A19Rik	RIKEN cDNA 4930452A19 gene	0	0	0
4930452B06Rik	RIKEN cDNA 4930452B06 gene	2.9179	0	0
4930452G13Rik	RIKEN cDNA 4930452G13 gene	0	0	0
4930452N14Rik	RIKEN cDNA 4930452N14 gene	0	0	0
4930453H23Rik	RIKEN cDNA 4930453H23 gene	0	0	0
4930453L07Rik	RIKEN cDNA 4930453L07 gene	0	0.0522775	0
4930453N24Rik	RIKEN cDNA 4930453N24 gene	42.6598	33.8235	23.6985
4930455B14Rik	RIKEN cDNA 4930455B14 gene	0	0	0
4930455C13Rik	RIKEN cDNA 4930455C13 gene	0.0583581	0.20911	0.235572
4930455D15Rik	RIKEN cDNA 4930455D15 gene	0	0	0.0471144
4930455F16Rik	RIKEN cDNA 4930455F16 gene	0	0	0
4930455H04Rik	RIKEN cDNA 4930455H04 gene	0	0	0
4930455J16Rik	RIKEN cDNA 4930455J16 gene	0	0	0
4930456L15Rik	RIKEN cDNA 4930456L15 gene	0	0	0
4930459C07Rik	RIKEN cDNA 4930459C07 gene	0	0	0.0942288
4930459L07Rik	RIKEN cDNA 4930459L07 gene	0	0	0
4930461G14Rik	RIKEN cDNA 4930461G14 gene	0.0583581	0	0
4930463O16Rik	RIKEN cDNA 4930463O16 gene	0	0.20911	0.0942288
4930465K10Rik	RIKEN cDNA 4930465K10 gene	0.233432	0.156832	0.0471144
4930465M20Rik	RIKEN cDNA 4930465M20 gene	0	0	0
4930467D21Rik	RIKEN cDNA 4930467D21 gene	0	0	0
4930467E23Rik	RIKEN cDNA 4930467E23 gene	0	0	0.0471144
4930467K11Rik	RIKEN cDNA 4930467K11 gene	0	0	0
4930468A15Rik	NA	0	0	0
4930469G21Rik	RIKEN cDNA 4930469G21 gene	0	0	0
4930470H14Rik	RIKEN cDNA 4930470H14 gene	17.7992	21.1724	28.5042
4930470P17Rik	RIKEN cDNA 4930470P17 gene	0	0	0
4930471C04Rik	RIKEN cDNA 4930471C04 gene	0	0	0
4930471G03Rik	RIKEN cDNA 4930471G03 gene	0	0	0
4930471M09Rik	RIKEN cDNA 4930471M09 gene	0	0	0
4930473A02Rik	RIKEN cDNA 4930473A02 gene	0.116716	0	0.0942288
4930473O22Rik	RIKEN cDNA 4930473O22 gene	0	0	0
4930474G06Rik	RIKEN cDNA 4930474G06 gene	0	0.0522775	0
4930474H20Rik	RIKEN cDNA 4930474H20 gene	0	0	0
4930474M22Rik	RIKEN cDNA 4930474M22 gene	0	0	0
4930474N05Rik	RIKEN cDNA 4930474N05 gene	0	0	0
4930474N09Rik	RIKEN cDNA 4930474N09 gene	0	0.0522775	0
4930478L05Rik	RIKEN cDNA 4930478L05 gene	0.0583581	0	0
4930478P22Rik	RIKEN cDNA 4930478P22 gene	0	0	0
4930479D17Rik	RIKEN cDNA 4930479D17 gene	0.0583581	0.0522775	0
4930480E11Rik	RIKEN cDNA 4930480E11 gene	0	0.0522775	0
4930480G23Rik	RIKEN cDNA 4930480G23 gene	0	0	0
4930480K15Rik	RIKEN cDNA 4930480K15 gene	0	0	0
4930480M12Rik	RIKEN cDNA 4930480M12 gene	0	0	0
4930481A15Rik	RIKEN cDNA 4930481A15 gene	0.0583581	0.261387	0.235572
4930482G09Rik	RIKEN cDNA 4930482G09 gene	0	0	0
4930483J18Rik	RIKEN cDNA 4930483J18 gene	0.0583581	0	0.0942288
4930483K19Rik	RIKEN cDNA 4930483K19 gene	0.233432	0.0522775	0.42403
4930483O08Rik	RIKEN cDNA 4930483O08 gene	0	0	0
4930486F22Rik	RIKEN cDNA 4930486F22 gene	0	0	0
4930486I03Rik	RIKEN cDNA 4930486I03 gene	0	0	0
4930486L24Rik	RIKEN cDNA 4930486L24 gene	0.350148	1.88199	0.0471144
4930487D11Rik	RIKEN cDNA 4930487D11 gene	0	0	0
4930487H11Rik	RIKEN cDNA 4930487H11 gene	0	0.0522775	0.0942288
4930488B22Rik	RIKEN cDNA 4930488B22 gene	0	0	0
4930488L21Rik	RIKEN cDNA 4930488L21 gene	0.350148	0.104555	0.0942288
4930500F04Rik	RIKEN cDNA 4930500F04 gene	0	0	0
4930500J02Rik	NA	0.0583581	0.104555	0.329801
4930500L23Rik	RIKEN cDNA 4930500L23 gene	0	0	0
4930502A04Rik	RIKEN cDNA 4930502A04 gene	0	0	0
4930502E09Rik	RIKEN cDNA 4930502E09 gene	0	0	0.0942288
4930502E18Rik	RIKEN cDNA 4930502E18 gene	0	0	0
4930503B20Rik	RIKEN cDNA 4930503B20 gene	0	0	0
4930503E14Rik	RIKEN cDNA 4930503E14 gene	0.116716	0.940994	0.188458
4930503E24Rik	RIKEN cDNA 4930503E24 gene	0	0.156832	0
4930503H13Rik	RIKEN cDNA 4930503H13 gene	0	0	0
4930503L19Rik	RIKEN cDNA 4930503L19 gene	34.6063	20.6496	17.2439
4930503O07Rik	RIKEN cDNA 4930503O07 gene	0	0	0
4930504O13Rik	RIKEN cDNA 4930504O13 gene	0	0	0
4930505A04Rik	RIKEN cDNA 4930505A04 gene	0.0583581	0.104555	0
4930505G20Rik	RIKEN cDNA 4930505G20 gene	0	0	0
4930506C21Rik	RIKEN cDNA 4930506C21 gene	0.29179	0.313665	0.518258
4930506M07Rik	NA	0.583581	0.575052	0.565373
4930507D05Rik	RIKEN cDNA 4930507D05 gene	0.29179	0.156832	0.188458
4930507D10Rik	RIKEN cDNA 4930507D10 gene	0	0	0
4930509E16Rik	RIKEN cDNA 4930509E16 gene	0.0583581	0.522775	0.0942288
4930509J09Rik	RIKEN cDNA 4930509J09 gene	0	0	0
4930509K18Rik	RIKEN cDNA 4930509K18 gene	0	0	0
4930511A02Rik	RIKEN cDNA 4930511A02 gene	0	0	0
4930511E03Rik	RIKEN cDNA 4930511E03 gene	0	0	0
4930511M06Rik	RIKEN cDNA 4930511M06 gene	10.6795	24.4659	19.788
4930512B01Rik	RIKEN cDNA 4930512B01 gene	0	0.156832	0.0471144
4930513D17Rik	RIKEN cDNA 4930513D17 gene	0	0	0
4930513N10Rik	RIKEN cDNA 4930513N10 gene	4.3185	4.80953	1.79035
4930513O06Rik	RIKEN cDNA 4930513O06 gene	0	0	0
4930515B02Rik	RIKEN cDNA 4930515B02 gene	0	0	0
4930515G01Rik	RIKEN cDNA 4930515G01 gene	0.350148	1.09783	1.22497
4930515G16Rik	RIKEN cDNA 4930515G16 gene	0	0	0
4930515L03Rik	RIKEN cDNA 4930515L03 gene	0	0	0
4930515L19Rik	RIKEN cDNA 4930515L19 gene	0	0	0
4930517E11Rik	RIKEN cDNA 4930517E11 gene	0	0	0
4930518P08Rik	RIKEN cDNA 4930518P08 gene	0	0	0
4930519D14Rik	RIKEN cDNA 4930519D14 gene	0	0	0
4930519F09Rik	RIKEN cDNA 4930519F09 gene	1.05045	1.72516	2.68552
4930519F16Rik	RIKEN cDNA 4930519F16 gene	0	0.0522775	0
4930519F24Rik	RIKEN cDNA 4930519F24 gene	0	0	0
4930519G04Rik	RIKEN cDNA 4930519G04 gene	0.175074	0.156832	0.141343
4930519H02Rik	RIKEN cDNA 4930519H02 gene	0	0	0
4930520O04Rik	RIKEN cDNA 4930520O04 gene	0.700297	0.575052	1.03652
4930520P13Rik	RIKEN cDNA 4930520P13 gene	0	0	0
4930521E06Rik	RIKEN cDNA 4930521E06 gene	0.116716	0	0
4930522H14Rik	RIKEN cDNA 4930522H14 gene	0	0	0
4930522O17Rik	RIKEN cDNA 4930522O17 gene	0	0	0
4930523C07Rik	RIKEN cDNA 4930523C07 gene	6.94461	7.58023	5.27681
4930523O13Rik	RIKEN cDNA 4930523O13 gene	0	0	0
4930524B15Rik	RIKEN cDNA 4930524B15 gene	0	0	0
4930524C18Rik	RIKEN cDNA 4930524C18 gene	0	0	0
4930524N10Rik	RIKEN cDNA 4930524N10 gene	0	0	0
4930524O05Rik	RIKEN cDNA 4930524O05 gene	0.0583581	0	0
4930524O08Rik	RIKEN cDNA 4930524O08 gene	0	0	0
4930525D18Rik	RIKEN cDNA 4930525D18 gene	0	0.0522775	0.0471144
4930525G20Rik	RIKEN cDNA 4930525G20 gene	0.350148	0.313665	0
4930525M21Rik	NA	0	0	0
4930526I15Rik	RIKEN cDNA 4930526I15 gene	2.56776	2.19565	2.40283
4930526L06Rik	RIKEN cDNA 4930526L06 gene	0	0	0
4930527F14Rik	RIKEN cDNA 4930527F14 gene	0	0	0
4930527G23Rik	RIKEN cDNA 4930527G23 gene	0	0	0
4930528A17Rik	RIKEN cDNA 4930528A17 gene	0.29179	0.365942	0.800945
4930528D03Rik	RIKEN cDNA 4930528D03 gene	0.408507	0.313665	0.659602
4930528P14Rik	RIKEN cDNA 4930528P14 gene	0	0	0.0471144
4930529C04Rik	RIKEN cDNA 4930529C04 gene	0	0	0
4930529K09Rik	RIKEN cDNA 4930529K09 gene	0	0	0
4930529L06Rik	RIKEN cDNA 4930529L06 gene	0	0	0
4930529M08Rik	NA	0	0	0
4930532M18Rik	RIKEN cDNA 4930532M18 gene	0	0	0
4930533B01Rik	RIKEN cDNA 4930533B01 gene	0.0583581	0	0.235572
4930533P14Rik	RIKEN cDNA 4930533P14 gene	0	0	0
4930538K18Rik	RIKEN cDNA 4930538K18 gene	0.0583581	0.0522775	0
4930539C22Rik	RIKEN cDNA 4930539C22 gene	0	0	0
4930539E08Rik	RIKEN cDNA 4930539E08 gene	0.116716	0.104555	0.235572
4930539J05Rik	RIKEN cDNA 4930539J05 gene	1.28388	0.993272	0.75383
4930539M17Rik	RIKEN cDNA 4930539M17 gene	0	0	0
4930539N22Rik	RIKEN cDNA 4930539N22 gene	0	0	0
4930540M03Rik	RIKEN cDNA 4930540M03 gene	0	0	0
4930542C21Rik	RIKEN cDNA 4930542C21 gene	0	0	0
4930542D17Rik	RIKEN cDNA 4930542D17 gene	0	0	0
4930543E12Rik	RIKEN cDNA 4930543E12 gene	0	0	0
4930544D05Rik	RIKEN cDNA 4930544D05 gene	0	0	0
4930544G11Rik	RIKEN cDNA 4930544G11 gene	0	0	0
4930544M13Rik	RIKEN cDNA 4930544M13 gene	0	0	0
4930545E07Rik	RIKEN cDNA 4930545E07 gene	0	0	0
4930545H06Rik	RIKEN cDNA 4930545H06 gene	0	0	0
4930545L23Rik	RIKEN cDNA 4930545L23 gene	0	0	0
4930546C10Rik	RIKEN cDNA 4930546C10 gene	0	0	0
4930546K05Rik	RIKEN cDNA 4930546K05 gene	0	0.0522775	0
4930547E08Rik	RIKEN cDNA 4930547E08 gene	0	0	0
4930547E14Rik	RIKEN cDNA 4930547E14 gene	0	0	0
4930548G14Rik	RIKEN cDNA 4930548G14 gene	0	0	0
4930548H24Rik	RIKEN cDNA 4930548H24 gene	0.175074	0.0522775	0.0942288
4930548J01Rik	RIKEN cDNA 4930548J01 gene	0	0	0
4930548K13Rik	RIKEN cDNA 4930548K13 gene	0	0	0
4930549C01Rik	RIKEN cDNA 4930549C01 gene	0	0	0
4930549G23Rik	RIKEN cDNA 4930549G23 gene	0.175074	0.0522775	0.141343
4930550C14Rik	RIKEN cDNA 4930550C14 gene	0.350148	0.261387	0.188458
4930550L24Rik	RIKEN cDNA 4930550L24 gene	0	0	0
4930552N02Rik	RIKEN cDNA 4930552N02 gene	0	0	0
4930552P12Rik	RIKEN cDNA 4930552P12 gene	0	0	0.141343
4930553E22Rik	RIKEN cDNA 4930553E22 gene	0	0	0
4930554C24Rik	RIKEN cDNA 4930554C24 gene	0	0	0
4930555B11Rik	RIKEN cDNA 4930555B11 gene	0	0.0522775	0
4930555G01Rik	RIKEN cDNA 4930555G01 gene	0.0583581	0.575052	3.20378
4930556C24Rik	RIKEN cDNA 4930556C24 gene	0	0	0
4930556G01Rik	RIKEN cDNA 4930556G01 gene	0	0	0
4930556J02Rik	RIKEN cDNA 4930556J02 gene	0	0	0
4930556M19Rik	RIKEN cDNA 4930556M19 gene	0.641939	1.56832	2.02592
4930556N09Rik	RIKEN cDNA 4930556N09 gene	0	0	0
4930557A04Rik	RIKEN cDNA 4930557A04 gene	0	0	0
4930557J02Rik	RIKEN cDNA 4930557J02 gene	0	0	0
4930558C23Rik	RIKEN cDNA 4930558C23 gene	0	0	0
4930558G05Rik	RIKEN cDNA 4930558G05 gene	0	0	0
4930558J18Rik	RIKEN cDNA 4930558J18 gene	1.45895	2.24793	0.42403
4930558K02Rik	RIKEN cDNA 4930558K02 gene	0	0.0522775	0.0471144
4930562C15Rik	RIKEN cDNA 4930562C15 gene	0.0583581	0	0.0942288
4930562F07Rik	RIKEN cDNA 4930562F07 gene	0.116716	0.104555	0.0942288
4930563D23Rik	RIKEN cDNA 4930563D23 gene	0	0.104555	0
4930563E18Rik	RIKEN cDNA 4930563E18 gene	0.0583581	0	0
4930563E22Rik	RIKEN cDNA 4930563E22 gene	0.466865	0.731884	0.329801
4930563F08Rik	RIKEN cDNA 4930563F08 gene	0	0	0
4930563M20Rik	RIKEN cDNA 4930563M20 gene	0	0	0
4930564B18Rik	NA	0	0	0
4930564C03Rik	RIKEN cDNA 4930564C03 gene	0	0	0
4930564D02Rik	RIKEN cDNA 4930564D02 gene	0	0	0
4930565D16Rik	RIKEN cDNA 4930565D16 gene	0	0	0
4930565N06Rik	RIKEN cDNA 4930565N06 gene	4.727	5.48913	3.39224
4930567H12Rik	RIKEN cDNA 4930567H12 gene	0	0	0
4930567H17Rik	RIKEN cDNA 4930567H17 gene	0	0	0
4930567J20Rik	RIKEN cDNA 4930567J20 gene	0	0	0
4930567K20Rik	RIKEN cDNA 4930567K20 gene	0	0	0
4930568D16Rik	RIKEN cDNA 4930568D16 gene	0	0	0
4930568E12Rik	RIKEN cDNA 4930568E12 gene	0	0	0
4930568G15Rik	RIKEN cDNA 4930568G15 gene	0	0	0
4930570G19Rik	RIKEN cDNA 4930570G19 gene	0	0.156832	0.612487
4930571K23Rik	RIKEN cDNA 4930571K23 gene	0	0	0
4930571O06Rik	RIKEN cDNA 4930571O06 gene	0	0	0.0471144
4930572K03Rik	RIKEN cDNA 4930572K03 gene	0	0	0
4930572O03Rik	RIKEN cDNA 4930572O03 gene	0.116716	0	0
4930572O13Rik	RIKEN cDNA 4930572O13 gene	0	0	0
4930573O16Rik	RIKEN cDNA 4930573O16 gene	0	0	0
4930577N17Rik	RIKEN cDNA 4930577N17 gene	0.758655	1.04555	0.895174
4930578C19Rik	RIKEN cDNA 4930578C19 gene	0	0	0
4930578E11Rik	RIKEN cDNA 4930578E11 gene	0	0	0
4930578I06Rik	RIKEN cDNA 4930578I06 gene	0	0	0
4930578M01Rik	RIKEN cDNA 4930578M01 gene	0.116716	0.0522775	0
4930578N18Rik	RIKEN cDNA 4930578N18 gene	0	0	0
4930579F01Rik	RIKEN cDNA 4930579F01 gene	0	0	0
4930579G18Rik	RIKEN cDNA 4930579G18 gene	1.51731	1.88199	1.83746
4930579G24Rik	RIKEN cDNA 4930579G24 gene	24.5687	13.6444	12.2026
4930579K19Rik	RIKEN cDNA 4930579K19 gene	0.175074	0	0.235572
4930581F22Rik	RIKEN cDNA 4930581F22 gene	1.22552	0.62733	1.3192
4930583K01Rik	RIKEN cDNA 4930583K01 gene	0	0	0
4930583P06Rik	RIKEN cDNA 4930583P06 gene	0	0	0
4930584F24Rik	RIKEN cDNA 4930584F24 gene	0	0	0
4930590J08Rik	RIKEN cDNA 4930590J08 gene	0	0.0522775	0.0942288
4930590L20Rik	RIKEN cDNA 4930590L20 gene	0	0.0522775	0
4930591A17Rik	RIKEN cDNA 4930591A17 gene	0	0	0
4930592A05Rik	RIKEN cDNA 4930592A05 gene	0.0583581	0	0
4930592I03Rik	RIKEN cDNA 4930592I03 gene	0.116716	0	0.188458
4930593A02Rik	RIKEN cDNA 4930593A02 gene	0.0583581	0	0
4930593C16Rik	RIKEN cDNA 4930593C16 gene	0	0	0
4930594C11Rik	RIKEN cDNA 4930594C11 gene	0	0	0.0471144
4930595M18Rik	RIKEN cDNA 4930595M18 gene	0	0	0
4930596D02Rik	RIKEN cDNA 4930596D02 gene	0	0	0
4930596I21Rik	RIKEN cDNA 4930596I21 gene	0	0	0
4930597G03Rik	RIKEN cDNA 4930597G03 gene	0	0	0
4930598F16Rik	RIKEN cDNA 4930598F16 gene	0	0	0
4930599N23Rik	RIKEN cDNA 4930599N23 gene	0.0583581	0.0522775	0
4931402G19Rik	RIKEN cDNA 4931402G19 gene	0.175074	0	0.0471144
4931403E22Rik	RIKEN cDNA 4931403E22 gene	0	0.104555	0.0942288
4931403G20Rik	RIKEN cDNA 4931403G20 gene	0.116716	0.104555	0.282686
4931406B18Rik	RIKEN cDNA 4931406B18 gene	0	0	0
4931406C07Rik	RIKEN cDNA 4931406C07 gene	25.911	34.5031	35.8541
4931406H21Rik	RIKEN cDNA 4931406H21 gene	0.408507	0.522775	0.282686
4931406P16Rik	RIKEN cDNA 4931406P16 gene	63.2018	61.6351	39.9059
4931408C20Rik	RIKEN cDNA 4931408C20 gene	0	0	0
4931408D14Rik	RIKEN cDNA 4931408D14 gene	0.116716	0.20911	0.282686
4931409K22Rik	RIKEN cDNA 4931409K22 gene	0	0	0
4931412M21	NA	0	0	0
4931414P19Rik	RIKEN cDNA 4931414P19 gene	7.29476	4.91408	3.06244
4931417E11Rik	RIKEN cDNA 4931417E11 gene	0	0	0
4931419H13Rik	RIKEN cDNA 4931419H13 gene	0	0	0
4931420L22Rik	RIKEN cDNA 4931420L22 gene	0	0	0
4931423N10Rik	RIKEN cDNA 4931423N10 gene	0	0.0522775	0.0942288
4931428F04Rik	RIKEN cDNA 4931428F04 gene	3.20969	37.8489	20.6832
4931428L18Rik	RIKEN cDNA 4931428L18 gene	0	0	0
4931429I11Rik	RIKEN cDNA 4931429I11 gene	0	0	0
4931429L15Rik	RIKEN cDNA 4931429L15 gene	0	0	0
4931429P17Rik	RIKEN cDNA 4931429P17 gene	0	0	0
4931430N09Rik	RIKEN cDNA 4931430N09 gene	0	0.0522775	0.0942288
4931431B13Rik	RIKEN cDNA 4931431B13 gene	0	0	0
4931431C16Rik	RIKEN cDNA 4931431C16 gene	0.175074	0	0.235572
4931431F19Rik	RIKEN cDNA 4931431F19 gene	0	0	0
4931440F15Rik	RIKEN cDNA 4931440F15 gene	0	0	0.188458
4931440J10Rik	RIKEN cDNA 4931440J10 gene	0	0	0
4931440L10Rik	NA	0	0.0522775	0
4931440P22Rik	RIKEN cDNA 4931440P22 gene	0.408507	0.470497	1.55478
4932411E22Rik	RIKEN cDNA 4932411E22 gene	0	0	0
4932411N23Rik	RIKEN cDNA 4932411N23 gene	0	0.0522775	0
4932412D23Rik	RIKEN cDNA 4932412D23 gene	0	0	0
4932413F04Rik	RIKEN cDNA 4932413F04 gene	0	0	0
4932414J04Rik	RIKEN cDNA 4932414J04 gene	0	0	0
4932414N04Rik	RIKEN cDNA 4932414N04 gene	0	0	0.0471144
4932415M13Rik	RIKEN cDNA 4932415M13 gene	0	0	0
4932416H05Rik	RIKEN cDNA 4932416H05 gene	2.80119	3.97309	2.44995
4932416K20Rik	RIKEN cDNA 4932416K20 gene	0	0	0
4932418E24Rik	RIKEN cDNA 4932418E24 gene	0	0	0
4932429P05Rik	RIKEN cDNA 4932429P05 gene	0	0	0
4932435O22Rik	RIKEN cDNA 4932435O22 gene	0	0	0
4932438A13Rik	RIKEN cDNA 4932438A13 gene	128.971	135.294	188.41
4932438H23Rik	RIKEN cDNA 4932438H23 gene	0.0583581	0.20911	0.0942288
4932441J04Rik	RIKEN cDNA 4932441J04 gene	0	0	0
4932443I19Rik	RIKEN cDNA 4932443I19 gene	0	0	0
4932702P03Rik	RIKEN cDNA 4932702P03 gene	0	0	0.0942288
4933400A11Rik	RIKEN cDNA 4933400A11 gene	0.0583581	0.313665	0.0471144
4933400B14Rik	RIKEN cDNA 4933400B14 gene	0	0	0
4933400C23Rik	RIKEN cDNA 4933400C23 gene	0	0	0
4933400F21Rik	RIKEN cDNA 4933400F21 gene	0.29179	0	0.141343
4933400L20Rik	RIKEN cDNA 4933400L20 gene	0	0	0
4933401B06Rik	RIKEN cDNA 4933401B06 gene	0	0	0
4933401D09Rik	RIKEN cDNA 4933401D09 gene	0	0	0.0471144
4933401H06Rik	RIKEN cDNA 4933401H06 gene	0	0	0
4933402C06Rik	RIKEN cDNA 4933402C06 gene	0	0	0
4933402D24Rik	RIKEN cDNA 4933402D24 gene	0	0.261387	0.0942288
4933402E13Rik	RIKEN cDNA 4933402E13 gene	0	0	0
4933402J07Rik	RIKEN cDNA 4933402J07 gene	0	0	0
4933402J10Rik	RIKEN cDNA 4933402J10 gene	0	0	0
4933402J15Rik	RIKEN cDNA 4933402J15 gene	0	0	0
4933402N03Rik	RIKEN cDNA 4933402N03 gene	0	0	0
4933402N22Rik	RIKEN cDNA 4933402N22 gene	0	0	0
4933402P03Rik	RIKEN cDNA 4933402P03 gene	0	0	0
4933403O08Rik	RIKEN cDNA 4933403O08 gene	0	0	0
4933404G15Rik	RIKEN cDNA 4933404G15 gene	0	0	0
4933404K08Rik	RIKEN cDNA 4933404K08 gene	0	0.0522775	0
4933404O12Rik	RIKEN cDNA 4933404O12 gene	9.51237	19.8654	11.7315
4933405D12Rik	RIKEN cDNA 4933405D12 gene	0	0.156832	0.188458
4933405E24Rik	RIKEN cDNA 4933405E24 gene	0	0	0
4933405L10Rik	RIKEN cDNA 4933405L10 gene	0.116716	0.313665	0.188458
4933405O20Rik	RIKEN cDNA 4933405O20 gene	0	0	0
4933406C10Rik	RIKEN cDNA 4933406C10 gene	0	0.0522775	0.141343
4933406D12Rik	RIKEN cDNA 4933406D12 gene	0	0	0
4933406F09Rik	RIKEN cDNA 4933406F09 gene	0.0583581	0	0
4933406G16Rik	RIKEN cDNA 4933406G16 gene	0	0	0
4933406I18Rik	RIKEN cDNA 4933406I18 gene	0	0	0
4933406J08Rik	RIKEN cDNA 4933406J08 gene	0	0	0
4933406J10Rik	RIKEN cDNA 4933406J10 gene	0	0.0522775	0.141343
4933406K04Rik	RIKEN cDNA 4933406K04 gene	0	0	0
4933406M09Rik	RIKEN cDNA 4933406M09 gene	0	0.104555	0
4933407E24Rik	RIKEN cDNA 4933407E24 gene	0	0	0
4933407G14Rik	RIKEN cDNA 4933407G14 gene	0	0	0.0471144
4933407I05Rik	RIKEN cDNA 4933407I05 gene	0	0	0
4933407K13Rik	RIKEN cDNA 4933407K13 gene	7.76162	9.82816	12.0613
4933407L21Rik	RIKEN cDNA 4933407L21 gene	0	0	0
4933408B17Rik	RIKEN cDNA 4933408B17 gene	0.875371	0.993272	0.706716
4933408J17Rik	RIKEN cDNA 4933408J17 gene	0.29179	0.261387	0
4933408N05Rik	RIKEN cDNA 4933408N05 gene	0	0	0
4933409G03Rik	RIKEN cDNA 4933409G03 gene	0	0	0
4933409K07Rik	RIKEN cDNA 4933409K07 gene	15.1731	14.1149	19.9765
4933411E08Rik	RIKEN cDNA 4933411E08 gene	0.0583581	0.104555	0
4933411G06Rik	RIKEN cDNA 4933411G06 gene	0	0	0
4933411G11Rik	NA	0.175074	0.104555	0.141343
4933411K16Rik	RIKEN cDNA 4933411K16 gene	0.116716	0.20911	1.60189
4933411K20Rik	NA	29.821	45.7951	33.357
4933412E12Rik	RIKEN cDNA 4933412E12 gene	5.60237	4.65269	13.192
4933412E24Rik	RIKEN cDNA 4933412E24 gene	0	0.0522775	0
4933412O06Rik	RIKEN cDNA 4933412O06 gene	0	0	0
4933413G19Rik	RIKEN cDNA 4933413G19 gene	0.0583581	0	0.141343
4933413J09Rik	RIKEN cDNA 4933413J09 gene	0.29179	0.0522775	0.141343
4933413L06Rik	RIKEN cDNA 4933413L06 gene	0	0	0
4933415F23Rik	RIKEN cDNA 4933415F23 gene	0	0	0
4933416C03Rik	RIKEN cDNA 4933416C03 gene	0	0	0.0471144
4933416E03Rik	RIKEN cDNA 4933416E03 gene	0	0	0
4933416I08Rik	RIKEN cDNA 4933416I08 gene	0	0	0
4933416M06Rik	RIKEN cDNA 4933416M06 gene	0	0	0
4933416M07Rik	RIKEN cDNA 4933416M07 gene	0	0	0
4933417A18Rik	RIKEN cDNA 4933417A18 gene	0	0	0
4933417D19Rik	RIKEN cDNA 4933417D19 gene	0.175074	0.104555	0.42403
4933417E11Rik	RIKEN cDNA 4933417E11 gene	0.0583581	0.104555	0.0471144
4933417G07Rik	RIKEN cDNA 4933417G07 gene	0	0	0.0942288
4933417O13Rik	RIKEN cDNA 4933417O13 gene	0	0.0522775	0
4933421I07Rik	RIKEN cDNA 4933421I07 gene	0	0	0.0471144
4933421O10Rik	RIKEN cDNA 4933421O10 gene	4.78536	7.68479	8.81039
4933422A05Rik	RIKEN cDNA 4933422A05 gene	0	0	0
4933422H20Rik	NA	0	0	0
4933424G05Rik	RIKEN cDNA 4933424G05 gene	0	0.0522775	0
4933424G06Rik	RIKEN cDNA 4933424G06 gene	0	0.0522775	0
4933425B07Rik	RIKEN cDNA 4933425B07 gene	0.0583581	0	0
4933425L06Rik	RIKEN cDNA 4933425L06 gene	0	0	0
4933426M11Rik	NA	117.183	138.849	110.201
4933427D06Rik	RIKEN cDNA 4933427D06 gene	0.0583581	0.104555	0.282686
4933427D14Rik	RIKEN cDNA 4933427D14 gene	17.9743	14.2195	25.3947
4933427E11Rik	RIKEN cDNA 4933427E11 gene	0.408507	0.261387	0.329801
4933427E13Rik	RIKEN cDNA 4933427E13 gene	0	0	0
4933427G17Rik	RIKEN cDNA 4933427G17 gene	0	0.20911	0.0942288
4933427I22Rik	RIKEN cDNA 4933427I22 gene	0	0	0
4933428C19Rik	RIKEN cDNA 4933428C19 gene	0	0	0
4933428G20Rik	RIKEN cDNA 4933428G20 gene	1.28388	0.62733	0.75383
4933429K18Rik	RIKEN cDNA 4933429K18 gene	0	0	0
4933429O19Rik	RIKEN cDNA 4933429O19 gene	0	0	0
4933430H16Rik	RIKEN cDNA 4933430H16 gene	0	0	0
4933430I17Rik	RIKEN cDNA 4933430I17 gene	0.233432	0.156832	0.471144
4933430M04Rik	RIKEN cDNA 4933430M04 gene	0	0	0
4933430N04Rik	RIKEN cDNA 4933430N04 gene	0	0	0
4933431E20Rik	RIKEN cDNA 4933431E20 gene	5.48566	9.5145	13.8987
4933431G14Rik	RIKEN cDNA 4933431G14 gene	0.466865	0.522775	0.800945
4933432G23Rik	RIKEN cDNA 4933432G23 gene	0	0	0
4933432I03Rik	RIKEN cDNA 4933432I03 gene	0	0	0
4933432I09Rik	RIKEN cDNA 4933432I09 gene	0.0583581	0	0.0471144
4933432K03Rik	RIKEN cDNA 4933432K03 gene	0	0	0
4933433C11Rik	RIKEN cDNA 4933433C11 gene	0	0	0.0471144
4933433F19Rik	RIKEN cDNA 4933433F19 gene	0	0	0
4933433G08Rik	RIKEN cDNA 4933433G08 gene	0	0	0
4933433G15Rik	RIKEN cDNA 4933433G15 gene	0	0.20911	0.0942288
4933433G19Rik	RIKEN cDNA 4933433G19 gene	0.0583581	0	0
4933433H22Rik	RIKEN cDNA 4933433H22 gene	0.233432	0.313665	0
4933434E20Rik	RIKEN cDNA 4933434E20 gene	39.1583	32.3597	57.9507
4933434I20Rik	NA	0	0	0
4933436E23Rik	RIKEN cDNA 4933436E23 gene	0	0	0
4933436H12Rik	RIKEN cDNA 4933436H12 gene	0	0	0
4933436I01Rik	RIKEN cDNA 4933436I01 gene	0	0	0
4933438B17Rik	RIKEN cDNA 4933438B17 gene	0	0	0
4933438K21Rik	RIKEN cDNA 4933438K21 gene	0	0	0.42403
4933439C10Rik	RIKEN cDNA 4933439C10 gene	2.27596	1.72516	3.72204
4933439K11Rik	RIKEN cDNA 4933439K11 gene	0	0	0
4933440J02Rik	RIKEN cDNA 4933440J02 gene	0	0	0
4933440M02Rik	RIKEN cDNA 4933440M02 gene	0	0	0
5031410I06Rik	RIKEN cDNA 5031410I06 gene	0	0	0
5031414D18Rik	RIKEN cDNA 5031414D18 gene	1.45895	0.836439	0.800945
5031425E22Rik	RIKEN cDNA 5031425E22 gene	7.46983	6.32557	13.7103
5031425F14Rik	RIKEN cDNA 5031425F14 gene	0	0	0
5031426D15Rik	RIKEN cDNA 5031426D15 gene	0.408507	1.51605	2.92109
5031434C07Rik	RIKEN cDNA 5031434C07 gene	0	0.20911	0
5031434O11Rik	RIKEN cDNA 5031434O11 gene	0.116716	0.156832	0.282686
5031439G07Rik	RIKEN cDNA 5031439G07 gene	104.578	120.395	99.7883
5033403H07Rik	RIKEN cDNA 5033403H07 gene	0	0	0
5033404E19Rik	RIKEN cDNA 5033404E19 gene	0	0	0
5033406O09Rik	RIKEN cDNA 5033406O09 gene	0.933729	0.104555	0.518258
5133400J02Rik	NA	0	0.0522775	0
5330411J11Rik	RIKEN cDNA 5330411J11 gene	0	0	0
5330413P13Rik	RIKEN cDNA 5330413P13 gene	0	0	0
5330417C22Rik	RIKEN cDNA 5330417C22 gene	0.0583581	0	0
5330426P16Rik	RIKEN cDNA 5330426P16 gene	9.68744	10.5078	4.71144
5330434G04Rik	RIKEN cDNA 5330434G04 gene	0	0	0.0942288
5330439B14Rik	RIKEN cDNA 5330439B14 gene	0	0	0
5430401F13Rik	RIKEN cDNA 5430401F13 gene	0	0	0
5430402E10Rik	RIKEN cDNA 5430402E10 gene	0	0	0
5430402O13Rik	RIKEN cDNA 5430402O13 gene	0	0	0.0471144
5430403N17Rik	RIKEN cDNA 5430403N17 gene	0	0.0522775	0.141343
5430405H02Rik	RIKEN cDNA 5430405H02 gene	1.51731	0.888717	1.79035
5430416N02Rik	RIKEN cDNA 5430416N02 gene	6.30267	7.31884	7.16139
5430416O09Rik	RIKEN cDNA 5430416O09 gene	0.116716	0	0
5430417L22Rik	NA	29.821	18.2971	32.0849
5430419D17Rik	RIKEN cDNA 5430419D17 gene	0.0583581	0	0.0471144
5430421F17Rik	RIKEN cDNA 5430421F17 gene	0	0.470497	0.0942288
5430421N21Rik	RIKEN cDNA 5430421N21 gene	0	0	0.0942288
5430425K12Rik	RIKEN cDNA 5430425K12 gene	0	0	0.0942288
5430427M07Rik	RIKEN cDNA 5430427M07 gene	0	0	0
5430427O19Rik	RIKEN cDNA 5430427O19 gene	0.0583581	0.156832	0.0942288
5430428K19Rik	RIKEN cDNA 5430428K19 gene	0	0.0522775	0
5430434I15Rik	RIKEN cDNA 5430434I15 gene	0	0	0
5430435G22Rik	NA	7.52819	30.2687	31.0484
5430437J10Rik	RIKEN cDNA 5430437J10 gene	0	0	0
5430440P10Rik	RIKEN cDNA 5430440P10 gene	0	0	0.0471144
5530400C23Rik	RIKEN cDNA 5530400C23 gene	0	0.0522775	0
5530401A14Rik	RIKEN cDNA 5530401A14 gene	0	0	0
5530601H04Rik	RIKEN cDNA 5530601H04 gene	3.55984	3.39804	2.92109
5730403I07Rik	RIKEN cDNA 5730403I07 gene	0.0583581	0.0522775	0
5730405O15Rik	RIKEN cDNA 5730405O15 gene	0.233432	0.104555	0.518258
5730408K05Rik	RIKEN cDNA 5730408K05 gene	1.28388	1.56832	3.15666
5730409E04Rik	RIKEN cDNA 5730409E04Rik gene	16.1652	22.5839	30.4359
5730412P04Rik	RIKEN cDNA 5730412P04 gene	0	0	0
5730416F02Rik	RIKEN cDNA 5730416F02 gene	0	0	0
5730420D15Rik	RIKEN cDNA 5730420D15 gene	0	0.104555	0
5730422E09Rik	RIKEN cDNA 5730422E09 gene	0	0.0522775	0.0471144
5730435O14Rik	RIKEN cDNA 5730435O14 gene	0	0	0
5730455P16Rik	RIKEN cDNA 5730455P16 gene	37.2325	42.8152	28.834
5730457N03Rik	RIKEN cDNA 5730457N03 gene	0	0	0
5730460C07Rik	RIKEN cDNA 5730460C07 gene	0	0	0
5730480H06Rik	RIKEN cDNA 5730480H06 gene	1.28388	0.993272	2.30861
5730488B01Rik	RIKEN cDNA 5730488B01 gene	0	0	0
5730507C01Rik	RIKEN cDNA 5730507C01 gene	53.7478	53.7412	60.9189
5730508B09Rik	RIKEN cDNA 5730508B09 gene	0.641939	0.679607	3.34512
5730522E02Rik	RIKEN cDNA 5730522E02 gene	0	0	0
5730559C18Rik	RIKEN cDNA 5730559C18 gene	3.20969	9.72361	4.2403
5830403L16Rik	NA	0	0	0.0471144
5830411N06Rik	RIKEN cDNA 5830411N06 gene	0	0	0
5830415F09Rik	RIKEN cDNA 5830415F09 gene	4.02671	3.03209	2.26149
5830416I19Rik	RIKEN cDNA 5830416I19 gene	0	0	0
5830416P10Rik	RIKEN cDNA 5830416P10 gene	0.29179	0.575052	0.0942288
5830417I10Rik	RIKEN cDNA 5830417I10 gene	82.6934	8.73034	81.4137
5830418K08Rik	NA	70.2631	50.2386	45.9837
5830418P13Rik	RIKEN cDNA 5830418P13 gene	0	0.0522775	0
5830428M24Rik	RIKEN cDNA 5830428M24 gene	0	0.104555	0.0471144
5830432E09Rik	RIKEN cDNA 5830432E09 gene	0.29179	0.365942	1.79035
5830444B04Rik	RIKEN cDNA 5830444B04 gene	0.0583581	0	0
5830454E08Rik	RIKEN cDNA 5830454E08 gene	0.116716	0.0522775	0.329801
5830473C10Rik	RIKEN cDNA 5830473C10 gene	0.175074	0.156832	0.282686
5930403L14Rik	RIKEN cDNA 5930403L14 gene	0.350148	1.20238	0
5930412G12Rik	RIKEN cDNA 5930412G12 gene	0	0	0
5930430L01Rik	RIKEN cDNA 5930430L01 gene	6.59446	11.2919	12.8151
5930438M14Rik	RIKEN cDNA 5930438M14 gene	0	0	0.0471144
6030407O03Rik	RIKEN cDNA 6030407O03 gene	0	0	0
6030408B16Rik	RIKEN cDNA 6030408B16 gene	0.0583581	0	0.0471144
6030419C18Rik	RIKEN cDNA 6030419C18 gene	30.0544	13.0171	17.9977
6030440G07Rik	RIKEN cDNA 6030440G07 gene	0	0.0522775	0.0942288
6030443J06Rik	RIKEN cDNA 6030443J06 gene	1.8091	2.50932	2.92109
6030458C11Rik	RIKEN cDNA 6030458C11 gene	50.5381	39.7309	32.4147
6030466F02Rik	RIKEN cDNA 6030466F02 gene	0	0	0
6030468B19Rik	RIKEN cDNA 6030468B19 gene	0	0	0
6030469F06Rik	RIKEN cDNA 6030469F06 gene	0	0	0
6030498E09Rik	RIKEN cDNA 6030498E09 gene	0	0	0
6230400D17Rik	RIKEN cDNA 6230400D17 gene	0.408507	0.261387	0.42403
6330403A02Rik	RIKEN cDNA 6330403A02 gene	0	0.0522775	0.0471144
6330403K07Rik	RIKEN cDNA 6330403K07 gene	0.525223	0.156832	0.659602
6330407A03Rik	RIKEN cDNA 6330407A03 gene	0.0583581	0	0
6330408A02Rik	RIKEN cDNA 6330408A02 gene	5.66073	4.02536	5.27681
6330409D20Rik	RIKEN cDNA 6330409D20 gene	0	0	0.0471144
6330410L21Rik	RIKEN cDNA 6330410L21 gene	0	0	0
6330415B21Rik	RIKEN cDNA 6330415B21 gene	0	0	0
6330416G13Rik	RIKEN cDNA 6330416G13 gene	4.43521	12.1284	19.0813
6330418K02Rik	RIKEN cDNA 6330418K02 gene	0.992087	0.522775	0.612487
6330419J24Rik	NA	0.350148	0.156832	0.0942288
6330549D23Rik	RIKEN cDNA 6330549D23 gene	1.63403	1.67288	2.40283
6430411K18Rik	RIKEN cDNA 6430411K18 gen	0.233432	0.20911	0
6430503K07Rik	RIKEN cDNA 6430503K07 gene	0	0	0
6430531B16Rik	RIKEN cDNA 6430531B16 gene	0	0.104555	0.0471144
6430548M08Rik	RIKEN cDNA 6430548M08 gene	2.21761	5.90735	8.81039
6430550D23Rik	RIKEN cDNA 6430550D23 gene	0.116716	0.20911	0.42403
6430562O15Rik	RIKEN cDNA 6430562O15 gene	0.233432	0.0522775	0
6430571L13Rik	RIKEN cDNA 6430571L13 gene	0.641939	0.156832	0.612487
6430573F11Rik	RIKEN cDNA 6430573F11 gene	0.0583581	0	0
6430584L05Rik	RIKEN cDNA 6430584L05 gene	0.0583581	0	0
6430706D22Rik	RIKEN cDNA 6430706D22 gene	258.176	163.994	96.8201
6430710C18Rik	RIKEN cDNA 6430710C18 gene	0	0	0
6530402F18Rik	RIKEN cDNA 6530402F18 gene	2.04253	8.78261	0.188458
6530411M01Rik	RIKEN cDNA 6530411M01 gene	0.0583581	0	0
6720416L17Rik	NA	0	0	0.235572
6720468P15Rik	RIKEN cDNA 6720468P15 gene	0.0583581	0	0
6720483E21Rik	RIKEN cDNA 6720483E21 gene	0	0.156832	0.0942288
6720489N17Rik	RIKEN cDNA 6720489N17 gene	7.52819	5.95963	5.84219
6820408C15Rik	RIKEN cDNA 6820408C15 gene	0	0	0
6820431F20Rik	RIKEN cDNA 6820431F20 gene	236.584	437.876	540.449
7420426K07Rik	RIKEN cDNA 7420426K07 gene	0	0	0
7420461P10Rik	RIKEN cDNA 7420461P10 gene	0	0.156832	0
7420700N18Rik	RIKEN cDNA 7420700N18 gene	0	0	0
7420701I03Rik	RIKEN cDNA 7420701I03 gene	0	0	0
7530416G11Rik	RIKEN cDNA 7530416G11 gene	0	0.0522775	0.0471144
7630403G23Rik	RIKEN cDNA 7630403G23 gene	0	0	0
8030411F24Rik	RIKEN cDNA 8030411F24 gene	0	0	0
8030423F21Rik	RIKEN cDNA 8030423F21 gene	0.0583581	0.104555	0
8030423J24Rik	RIKEN cDNA 8030423J24 gene	0	0	0
8030442B05Rik	RIKEN cDNA 8030442B05 gene	0	0	0
8030443G20Rik	RIKEN cDNA 8030443G20 gene	0	0	0
8030462N17Rik	RIKEN cDNA 8030462N17 gene	25.6192	24.3613	22.8034
8430408G22Rik	RIKEN cDNA 8430408G22 gene	0	0.0522775	0.0471144
8430419L09Rik	RIKEN cDNA 8430419L09 gene	12.8971	13.8535	6.07776
8430422H06Rik	RIKEN cDNA 8430422H06 gene	0	0	0
8430423G03Rik	RIKEN cDNA 8430423G03 gene	0.408507	0.104555	0.376915
8430426J06Rik	RIKEN cDNA 8430426J06 gene	0.116716	0	0.0471144
8430427H17Rik	NA	18.8497	8.41667	0.42403
8430429K09Rik	RIKEN cDNA 8430429K09 gene	3.50148	2.40476	4.94701
8430431K14Rik	RIKEN cDNA 8430431K14 gene	0.116716	0.0522775	0
8430436N08Rik	RIKEN cDNA 8430436N08 gene	0.116716	1.6206	0
8430437L04Rik	RIKEN cDNA 8430437L04 gene	0	0	0
9030025P20Rik	RIKEN cDNA 9030025P20 gene	5.48566	4.07764	14.7939
9030204H09Rik	RIKEN cDNA 9030204H09 gene	0	0	0
9030404E10Rik	RIKEN cDNA 9030404E10 gene	0	0	0
9030612E09Rik	RIKEN cDNA 9030612E09 gene	0	0.104555	0
9030617O03Rik	RIKEN cDNA 9030617O03 gene	26.9614	56.3028	55.0296
9030619P08Rik	RIKEN cDNA 9030619P08 gene	0	0	0
9030624G23Rik	RIKEN cDNA 9030624G23 gene	10.3294	9.77589	22.3793
9030624J02Rik	RIKEN cDNA 9030624J02 gene	60.2255	88.5057	75.5715
9030625G05Rik	RIKEN cDNA 9030625G05 gene	0	0	0
9130008F23Rik	RIKEN cDNA 9130008F23 gene	7.41148	6.01191	10.0354
9130011E15Rik	RIKEN cDNA 9130011E15 gene	15.815	12.808	23.5572
9130015A21Rik	RIKEN cDNA 9130015A21 gene	0.175074	0.104555	0
9130015L21Rik	RIKEN cDNA 9130015L21 gene	0	0	0
9130019O22Rik	RIKEN cDNA 9130019O22 gene	0.700297	0.470497	7.06716
9130019P16Rik	RIKEN cDNA 9130019P16 gene	0	0	0
9130023H24Rik	RIKEN cDNA 9130023H24 gene	7.00297	7.78934	7.91522
9130024F11Rik	RIKEN cDNA 9130024F11 gene	1.8091	3.55487	4.38164
9130204L05Rik	RIKEN cDNA 9130204L05 gene	0	0	0
9130209A04Rik	RIKEN cDNA 9130209A04 gene	0	0	0
9130221F21Rik	RIKEN cDNA 9130221F21 gene	0.175074	0.365942	0.42403
9130221H12Rik	RIKEN cDNA 9130221H12 gene	6.47775	5.95963	7.82099
9130227L01Rik	RIKEN cDNA 9130227L01 gene	0	0.104555	0
9130230L23Rik	RIKEN cDNA 9130230L23 gene	0	0	0
9130401M01Rik	RIKEN cDNA 9130401M01 gene	32.7389	32.7257	26.8081
9130409I23Rik	RIKEN cDNA 9130409I23 gene	0.0583581	0.0522775	0
9230009I02Rik	RIKEN cDNA 9230009I02 gene	0	0	0
9230102K24Rik	RIKEN cDNA 9230102K24 gene	0	0	0
9230102O04Rik	RIKEN cDNA 9230102O04 gene	0	0	0
9230104L09Rik	RIKEN cDNA 9230104L09 gene	0	0	0
9230105E05Rik	RIKEN cDNA 9230105E05 gene	0.408507	0.20911	3.06244
9230110C19Rik	RIKEN cDNA 9230110C19 gene	1.98417	3.39804	6.8787
9230110F15Rik	RIKEN cDNA 9230110F15 gene	0	0	0
9230112D13Rik	RIKEN cDNA 9230112D13 gene	0	0	0
9230112J17Rik	RIKEN cDNA 9230112J17 gene	0	0	0
9230114K14Rik	RIKEN cDNA 9230114K14 gene	7.81998	9.09628	6.40756
9230116L04Rik	RIKEN cDNA 9230116L04 gene	0.175074	0.104555	0.0471144
9230116N13Rik	RIKEN cDNA 9230116N13 gene	0.233432	0.0522775	0.329801
9330020H09Rik	RIKEN cDNA 9330020H09 gene	1.40059	2.24793	3.39224
9330102E08Rik	RIKEN cDNA 9330102E08 gene	0.350148	1.1501	2.07303
9330111N05Rik	RIKEN cDNA 9330111N05 gene	0	0	0.0942288
9330117O12Rik	RIKEN cDNA 9330117O12 gene	0	0	0.0471144
9330133O14Rik	RIKEN cDNA 9330133O14 gene	2.68447	2.71843	9.75268
9330151L19Rik	RIKEN cDNA 9330151L19 gene	3.55984	1.88199	6.12487
9330158H04Rik	RIKEN cDNA 9330158H04 gene	0.0583581	0.104555	0.0471144
9330159F19Rik	RIKEN cDNA 9330159F19 gene	0	0.156832	11.6373
9330159M07Rik	RIKEN cDNA 9330159M07 gene	2.27596	1.51605	1.50766
9330162012Rik	cDNA RIKEN 9330162012 gene	0	0.104555	0.141343
9330162B11Rik	RIKEN cDNA 9330162B11 gene	0	0	0
9330175E14Rik	RIKEN cDNA 9330175E14 gene	0	0.313665	0
9330175M20Rik	RIKEN cDNA 9330175M20 gene	0	0	0
9330178D15Rik	RIKEN cDNA 9330178D15 gene	0	0	0
9330179D12Rik	RIKEN cDNA 9330179D12 gene	0.233432	0.0522775	0.0471144
9330182L06Rik	RIKEN cDNA 9330182L06 gene	0.525223	0.522775	0
9330182O14Rik	RIKEN cDNA 9330182O14 gene	0	0	0
9330188P03Rik	RIKEN cDNA 9330188P03 gene	0	0	0
9430007A20Rik	RIKEN cDNA 9430007A20 gene	0	0	0
9430008C03Rik	NA	22.1177	22.5316	36.231
9430014N10Rik	RIKEN cDNA 9430014N10 gene	0	0	0
9430015G10Rik	RIKEN cDNA 9430015G10 gene	21.4758	9.77589	14.417
9430016H08Rik	RIKEN cDNA 9430016H08 gene	15.5816	13.0171	16.066
9430018G01Rik	RIKEN cDNA 9430018G01 gene	0.233432	0.993272	0.895174
9430019J16Rik	RIKEN cDNA 9430019J16 gene	0	0	0
9430020K01Rik	RIKEN cDNA 9430020K01 gene	87.187	105.339	77.5974
9430021M05Rik	RIKEN cDNA 9430021M05 gene	0	0	0
9430037G07Rik	RIKEN cDNA 9430037G07 gene	5.54402	5.17547	1.60189
9430038I01Rik	RIKEN cDNA 9430038I01 gene	2.5094	2.40476	2.54418
9430041J12Rik	RIKEN cDNA 9430041J12 gene	0	0	0
9430060I03Rik	RIKEN cDNA 9430060I03 gene	0	0.261387	0.282686
9430069I07Rik	RIKEN cDNA 9430069I07 gene	0	0	0.141343
9430076C15Rik	RIKEN cDNA 9430076C15 gene	0.641939	0.261387	0
9430083A17Rik	RIKEN cDNA 9430083A17 gene	0.0583581	0.104555	0.565373
9430091E24Rik	RIKEN cDNA 9430091E24 gene	0.525223	1.56832	0.75383
9530002B09Rik	RIKEN cDNA 9530002B09 gene	0	0	0
9530003J23Rik	RIKEN cDNA 9530003J23 gene	0	0	0
9530026F06Rik	RIKEN cDNA 9530026F06 gene	0	0	0.0471144
9530026P05Rik	RIKEN cDNA 9530026P05 gene	0.0583581	0.20911	0
9530027J09Rik	RIKEN cDNA 9530027J09 gene	0.29179	0.679607	0.612487
9530036O11Rik	RIKEN cDNA 9530036O11Rik	0	0	0
9530051G07Rik	RIKEN cDNA 9530051G07 gene	0	0.0522775	0
9530052E02Rik	RIKEN cDNA 9530052E02 gene	0	0.0522775	0
9530053A07Rik	RIKEN cDNA 9530053A07 gene	3.26805	0.888717	2.12015
9530059O14Rik	RIKEN cDNA 9530059O14 gene	0	0	0
9530068E07Rik	RIKEN cDNA 9530068E07 gene	225.262	326.211	233.829
9530077C05Rik	RIKEN cDNA 9530077C05 gene	2.27596	2.03882	2.44995
9530080O11Rik	RIKEN cDNA 9530080O11 gene	0	0	0
9530082P21Rik	RIKEN cDNA 9530082P21 gene	17.6825	17.2516	16.7256
9530091C08Rik	RIKEN cDNA 9530091C08 gene	3.09298	2.50932	3.58069
9630001P10Rik	RIKEN cDNA 9630001P10 gene	0.0583581	0.0522775	0
9630013A20Rik	RIKEN cDNA 9630013A20 gene	0	0	0
9630028B13Rik	RIKEN cDNA 9630028B13 gene	0	0	0.188458
9630028H03Rik	RIKEN cDNA 9630028H03 gene	0	0.20911	0
9630033F20Rik	NA	11.088	17.4607	6.03064
9830107B12Rik	RIKEN cDNA 9830107B12 gene	0.0583581	0.156832	0.282686
9830132P13Rik	RIKEN cDNA 9830132P13 gene	0.408507	0.156832	0.235572
9830147E19Rik	RIKEN cDNA 9830147E19 gene	6.47775	6.11646	8.76328
9830166K06Rik	RIKEN cDNA 9830166K06 gene	0	0.0522775	0.0471144
9930012K11Rik	RIKEN cDNA 9930012K11 gene	6.1276	5.54141	3.10955
9930014A18Rik	RIKEN cDNA 9930014A18 gene	0.466865	1.25466	0
9930021J03Rik	RIKEN cDNA 9930021J03 gene	53.3393	46.7883	72.6504
9930104L06Rik	RIKEN cDNA 9930104L06 gene	15.2315	11.1874	8.76328
9930111H07Rik	RIKEN cDNA 9930111H07 gene	0.116716	0	0.0942288
9930111J21Rik1	RIKEN cDNA 9930111J21 gene 1	7.46983	7.4234	16.066
9930111J21Rik2	RIKEN cDNA 9930111J21 gene 2	1.34224	1.46377	1.46055
A130010J15Rik	RIKEN cDNA A130010J15 gene	7.99506	9.14856	11.9199
A130077B15Rik	RIKEN cDNA A130077B15 gene	122.319	149.461	203.817
A1bg	alpha-1-B glycoprotein	0	0	0
A1cf	APOBEC1 complementation factor	0	0	0
A230001M10Rik	RIKEN cDNA A230001M10 gene	0.0583581	0	0
A230009B12Rik	RIKEN cDNA A230009B12 gene	0	0	0
A230020J21Rik	RIKEN cDNA A230020J21 gene	0	0.156832	0.141343
A230028O05Rik	RIKEN cDNA A230028O05 gene	0.0583581	0.313665	1.3192
A230046K03Rik	RIKEN cDNA A230046K03 gene	88.821	147.893	192.557
A230050P20Rik	RIKEN cDNA A230050P20 gene	0	1.67288	0
A230056J06Rik	RIKEN cDNA A230056J06 gene	0	0.0522775	0.0471144
A230056P14Rik	RIKEN cDNA A230056P14 gene	0.641939	1.20238	0.612487
A230057D06Rik	RIKEN cDNA A230057D06 gene	0	0.993272	0.235572
A230065H16Rik	RIKEN cDNA A230065H16 gene	0	0	0.141343
A230070E04Rik	RIKEN cDNA A230070E04 gene	0	0	0
A230072C01Rik	RIKEN cDNA A230072C01 gene	6.88625	6.32557	8.62194
A230072E10Rik	RIKEN cDNA A230072E10 gene	0.116716	0.62733	0.0942288
A230073K19Rik	RIKEN cDNA A230073K19 gene	0.29179	0.104555	0.282686
A230077H06Rik	RIKEN cDNA A230077H06 gene	0	0.0522775	0.0942288
A230103J11Rik	RIKEN cDNA A230103J11 gene	3.03462	5.12319	3.10955
A230108P19Rik	RIKEN cDNA A230108P19 gene	0	0	0.0471144
A2m	alpha-2-macroglobulin	0.116716	0	0
A330009N23Rik	RIKEN cDNA A330009N23 gene	0.875371	0.679607	0.565373
A330021E22Rik	NA	5.07715	7.37112	19.8352
A330023F24Rik	RIKEN cDNA A330023F24 gene	0.175074	0.993272	2.44995
A330032B11Rik	RIKEN cDNA A330032B11 gene	1.86746	2.14338	5.46527
A330033J07Rik	RIKEN cDNA A330033J07 gene	0.175074	0.20911	0.188458
A330035P11Rik	RIKEN cDNA A330035P11 gene	0.758655	1.82971	0.706716
A330040F15Rik	RIKEN cDNA A330040F15 gene	0.350148	0.156832	0.188458
A330041J22Rik	RIKEN cDNA A330041J22 gene	0.29179	0	0.0471144
A330048O09Rik	RIKEN cDNA A330048O09 gene	0	0	0
A330049N07Rik	RIKEN cDNA A330049N07 gene	0	0	1.69612
A330050F15Rik	RIKEN cDNA A330050F15 gene	0	0	0
A330069E16Rik	RIKEN cDNA A330069E16 gene	0.175074	0.156832	0.518258
A330070K13Rik	RIKEN cDNA A330070K13 gene	0	0	0
A330074K22Rik	RIKEN cDNA A330074K22 gene	2.45104	9.09628	4.09895
A330076C08Rik	RIKEN cDNA A330076C08 gene	0	0	0
A330076H08Rik	RIKEN cDNA A330076H08 gene	0	0.62733	0
A330093E20Rik	RIKEN cDNA A330093E20 gene	0	0	0
A330102I10Rik	RIKEN cDNA A330102I10 gene	0	0	0
A3galt2	alpha 1,3-galactosyltransferase 2 (isoglobotriaosylceramide synthase)	0.0583581	0.156832	0.376915
A430005L14Rik	RIKEN cDNA A430005L14 gene	11.9634	13.5399	8.76328
A430033K04Rik	RIKEN cDNA A430033K04 gene	7.64491	7.00518	6.92582
A430035B10Rik	RIKEN cDNA A430035B10 gene	0.233432	0.104555	0.848059
A430078G23Rik	RIKEN cDNA A430078G23 gene	4.20178	4.1822	6.40756
A430088P11Rik	RIKEN cDNA A430088P11 gene	0	0	0
A430089I19Rik	RIKEN cDNA A430089I19 gene	0	0.0522775	0
A430090L17Rik	RIKEN cDNA A430090L17 gene	0	0	0.0942288
A430093F15Rik	RIKEN cDNA A430093F15 gene	0	0.0522775	0.0471144
A430105I19Rik	RIKEN cDNA A430105I19 gene	54.0396	83.8531	136.962
A430107P09Rik	RIKEN cDNA A430107P09 gene	1.34224	2.66615	2.35572
A4galt	alpha 1,4-galactosyltransferase	6.18596	0.313665	0
A4gnt	alpha-1,4-N-acetylglucosaminyltransferase	0	0.104555	0.0471144
A530006G24Rik	RIKEN cDNA A530006G24 gene	0	0	0
A530013C23Rik	RIKEN cDNA A530013C23 gene	0.0583581	0.522775	1.41343
A530016L24Rik	RIKEN cDNA A530016L24 gene	0.0583581	0	0.235572
A530032D15Rik	RIKEN cDNA A530032D15Rik gene	0	0	0.659602
A530046M15Rik	RIKEN cDNA A530046M15 gene	0.233432	0.261387	0.0942288
A530050N04Rik	RIKEN cDNA A530050N04 gene	0	0	0
A530053G22Rik	RIKEN cDNA A530053G22 gene	0	0	0
A530054K11Rik	NA	14.8813	13.9581	16.2545
A530058N18Rik	RIKEN cDNA A530058N18 gene	0	0	0
A530064D06Rik	RIKEN cDNA A530064D06 gene	0.350148	0.156832	0.235572
A530065N20Rik	RIKEN cDNA A530046M15 gene	0	0	0
A530072M11Rik	RIKEN cDNA gene A530072M11	0	0.731884	0.376915
A530088E08Rik	RIKEN cDNA A530088E08 gene	0	0.0522775	0
A530099J19Rik	RIKEN cDNA A530099J19 gene	0	0	0
A630001G21Rik	RIKEN cDNA A630001G21 gene	0.175074	1.41149	3.25089
A630007B06Rik	NA	29.9377	29.7459	46.549
A630010A05Rik	RIKEN cDNA A630010A05 gene	0.0583581	0	0
A630012P03Rik	RIKEN cDNA A630012P03 gene	0	0	0
A630019I02Rik	RIKEN cDNA A630019I02 gene	0	0.156832	0
A630020A06	NA	0.175074	0.104555	0.75383
A630023A22Rik	RIKEN cDNA A630023A22 gene	0.0583581	0.104555	0
A630023P12Rik	RIKEN cDNA A630023P12 gene	0	0	0
A630033H20Rik	RIKEN cDNA A630033H20 gene	1.57567	13.1739	0.188458
A630066F11Rik	RIKEN cDNA A630066F11 gene	0.583581	0.679607	0.706716
A630072M18Rik	RIKEN cDNA A630072M18 gene	3.38477	2.66615	3.29801
A630073D07Rik	RIKEN cDNA A630073D07 gene	0	0	0
A630075F10Rik	RIKEN cDNA A630075F10 gene	0.408507	0.470497	0.800945
A630076J17Rik	RIKEN cDNA A630076J17 gene	0	0.0522775	0.0471144
A630077J23Rik	RIKEN cDNA A630077J23 gene	0	0	0
A630089N07Rik	RIKEN cDNA A630089N07 gene	37.2325	41.4038	50.4595
A630095E13Rik	RIKEN cDNA A630095E13 gene	0.408507	0.156832	0
A630095N17Rik	RIKEN cDNA A630095N17 gene	0.0583581	0	0
A730006G06Rik	RIKEN cDNA A730006G06 gene	0	0	0
A730008H23Rik	RIKEN cDNA A730008H23 gene	54.6232	37.2216	23.4159
A730017C20Rik	RIKEN cDNA A730017C20 gene	0	0	0
A730017L22Rik	RIKEN cDNA A730017L22 gene	8.11177	8.88717	9.65845
A730018C14Rik	RIKEN cDNA A730018C14 gene	0	0.0522775	0
A730020E08Rik	RIKEN cDNA A730020E08 gene	1.69238	0.104555	0.848059
A730020M07Rik	RIKEN cDNA A730020M07 gene	0.0583581	0.41822	0.0471144
A730036I17Rik	RIKEN cDNA A730036I17 gene	0	0	0
A730043L09Rik	RIKEN cDNA A730043L09 gene	0	0	0
A730046J19Rik	RIKEN cDNA A730046J19 gene	0	0	0.188458
A730056A06Rik	RIKEN cDNA A730056A06 gene	0	0.41822	0.376915
A730082K24Rik	RIKEN cDNA A730082K24 gene	0.0583581	0.0522775	0.282686
A730085K08Rik	RIKEN cDNA A730085K08 gene	0	0	0.0471144
A730090H04Rik	RIKEN cDNA A730090H04 gene	0	0.575052	0
A730090N16Rik	RIKEN cDNA A730090N16 gene	0.525223	0.470497	0.518258
A730098P11Rik	NA	2.39268	1.6206	21.3428
A830009L08Rik	RIKEN cDNA A830009L08 gene	0	0	0.188458
A830010M20Rik	RIKEN cDNA A830010M20 gene	7.00297	8.88717	20.9188
A830018L16Rik	RIKEN cDNA A830018L16 gene	0	0.104555	0.0942288
A830019L24Rik	RIKEN cDNA A830019L24 gene	0	0	0
A830052D11Rik	RIKEN cDNA A830052D11 gene	0.0583581	0.0522775	0.141343
A830080D01Rik	RIKEN cDNA A830080D01 gene	21.7676	12.7557	17.291
A830082K12Rik	RIKEN cDNA A830082K12 gene	1.28388	5.90735	5.41816
A830082N09Rik	RIKEN cDNA A830082N09 gene	2.45104	2.40476	1.649
A930001A20Rik	RIKEN cDNA A930001A20 gene	0	0	0
A930001C03Rik	RIKEN cDNA A930001C03 gene	1.22552	2.0911	1.46055
A930003A15Rik	RIKEN cDNA A930003A15 gene	0	0	0
A930003O13Rik	RIKEN cDNA A930003O13 gene	0	0.104555	0
A930004D18Rik	RIKEN cDNA A930004D18 gene	8.28685	8.78261	12.6738
A930005H10Rik	RIKEN cDNA A930005H10 gene	0.641939	0.784162	1.27209
A930006I01Rik	RIKEN cDNA A930006I01 gene	0	0	0
A930006K02Rik	RIKEN cDNA A930006K02 gene	0.0583581	0.0522775	0
A930007I19Rik	RIKEN cDNA A930007I19 gene	0.116716	0.20911	0.376915
A930009A15Rik	RIKEN cDNA A930009A15 gene	0.0583581	0	0
A930011G23Rik	RIKEN cDNA A930011G23 gene	0	0	0
A930011O12Rik	NA	0	0	0
A930012L18Rik	RIKEN cDNA A930012L18 gene	0.641939	0.41822	0.329801
A930013F10Rik	RIKEN cDNA A930013F10 gene	3.73492	5.17547	7.96233
A930015D03Rik	RIKEN cDNA A930015D03 gene	0.700297	0.470497	3.86338
A930016O22Rik	RIKEN cDNA A930016O22 gene	0.175074	0.0522775	0.0942288
A930017M01Rik	RIKEN cDNA A930017M01 gene	0.0583581	3.2412	0
A930018P22Rik	RIKEN cDNA A930018P22 gene	0	0.0522775	0
A930019D19Rik	RIKEN cDNA A930019D19 gene	0	0.0522775	0.565373
A930024E05Rik	RIKEN cDNA A930024E05 gene	0.525223	0.365942	0.942288
A930041C12Rik	RIKEN cDNA A930041C12 gene	0.0583581	0.104555	0
AA387883	expressed sequence AA387883	0	0	0
AA388235	expressed sequence AA388235	1.75074	1.51605	0.0942288
AA413626	expressed sequence AA413626	0.0583581	0.0522775	0.235572
AA414768	expressed sequence AA414768	5.25223	9.20083	0
AA415398	expressed sequence AA415398	0.466865	0.313665	0.612487
AA465934	expressed sequence AA465934	0.175074	0.20911	0.376915
AA467197	expressed sequence AA467197	0.116716	1.20238	0.282686
AA474331	expressed sequence AA474331	0.817013	1.67288	1.36632
AA536875	expressed sequence AA536875	0	0	0
AA543186	expressed sequence AA543186	0.116716	0.0522775	0.329801
AA543401	cDNA sequence, AA543401	0	0	0
AA545190	EST AA545190	0	0	0
AA619741	expressed sequence AA619741	0	0	0
AA792892	expressed sequence AA792892	0	0	0
AA986860	expressed sequence AA986860	1.75074	1.6206	4.00472
AA987161	NA	10.6212	10.4555	11.4488
AB041803	NA	0.0583581	0.156832	0.188458
AB124611	cDNA sequence AB124611	0.29179	0.575052	0.471144
AF067061	cDNA sequence AF067061	0	0	0.0942288
AF067063	cDNA sequence AF067063	0	0	0
AF251705	cDNA sequence AF251705	0.0583581	0	0
AF357355	snoRNA AF357355	0	0	0
AF357359	snoRNA AF357359	0	0	0
AF357399	snoRNA AF357399	0	0	0
AF357425	snoRNA AF357425	0.0583581	0	0
AF357426	snoRNA AF357426	0	0	0
AF366264	cDNA sequence AF366264	0.233432	0.156832	0.471144
AF529169	cDNA sequence AF529169	0	0	0
AI115009	expressed sequence AI115009	0	0.261387	0.706716
AI118078	expressed sequence AI118078	0.0583581	0.156832	0.0471144
AI182371	expressed sequence AI182371	0	0	0
AI197445	expressed sequence AI197445	0.116716	0.20911	0.282686
AI314180	expressed sequence AI314180	179.568	161.642	401.179
AI314278	expressed sequence AI314278	0	0	0.141343
AI317395	expressed sequence AI317395	0.116716	0.522775	0.188458
AI413582	expressed sequence AI413582	4.55193	5.64597	8.71616
AI414108	expressed sequence AI414108	12.6637	6.69152	0
AI427809	expressed sequence AI427809	0	0	0.235572
AI429214	expressed sequence AI429214	1.1088	3.97309	1.9788
AI450353	expressed sequence AI450353	0.933729	0.731884	1.08363
AI462493	NA	7.99506	6.69152	4.38164
AI463170	expressed sequence AI463170	0	0	0
AI464131	expressed sequence AI464131	7.9367	13.2785	14.1343
AI467606	expressed sequence AI467606	0	0.104555	0.188458
AI504432	expressed sequence AI504432	0	0.0522775	0
AI506816	expressed sequence AI506816	3.79327	3.97309	66.0073
AI507597	expressed sequence AI507597	0	0	0.0471144
AI593442	expressed sequence AI593442	0	10.8214	0
AI597479	expressed sequence AI597479	25.8526	28.7003	32.1791
AI606473	expressed sequence AI606473	0	0	0.0942288
AI607873	expressed sequence AI607873	0.175074	0.62733	3.86338
AI646519	expressed sequence AI646519	0	0	0
AI661453	expressed sequence AI661453	1.34224	0.313665	0
AI662270	expressed sequence AI662270	0	0	0.235572
AI747448	NA	0	0	0
AI837181	expressed sequence AI837181	38.6914	37.1693	40.1415
AI839979	expressed sequence AI839979	0.233432	0.940994	0.376915
AI846148	expressed sequence AI846148	26.7864	26.2956	29.4465
AI847159	expressed sequence AI847159	0	0	0
AI848285	NA	0.0583581	0.20911	0.0471144
AI854517	expressed sequence AI854517	0	0	0
AI854703	expressed sequence AI854703	0.0583581	1.41149	0
AI987944	expressed sequence AI987944	9.68744	13.8535	20.6832
AK010878	cDNA sequence AK010878	3.96835	4.65269	7.5383
AK129341	NA	1.34224	0.888717	4.42875
AU015228	expressed sequence AU015228	0	0	0
AU015791	expressed sequence AU015791	0	0	0
AU015836	expressed sequence AU015836	0.0583581	0	0
AU016765	expressed sequence AU016765	0	0	0
AU018091	expressed sequence AU018091	1.05045	0.41822	0
AU018829	NA	0	0	0
AU019823	expressed sequence AU019823	22.818	20.3882	22.4736
AU019990	expressed sequence AU019990	0	0	0
AU021063	expressed sequence AU021063	0	0	0
AU021092	expressed sequence AU021092	0.466865	0	0
AU022252	expressed sequence AU022252	9.27893	10.2987	13.4747
AU022751	expressed sequence AU022751	0	0	0.0942288
AU022754	expressed sequence AU022754	0.0583581	0.104555	0
AU022793	expressed sequence AU022793	0	0	0
AU023762	expressed sequence AU023762	0.0583581	0	0
AU040320	expressed sequence AU040320	35.7151	42.2925	87.8684
AU040972	expressed sequence AU040972	0.0583581	0	0.0471144
AU041133	expressed sequence AU041133	3.20969	3.45031	6.50179
AV039307	expressed sequence AV039307	0.29179	0.156832	0.329801
AV051173	expressed sequence AV051173	0	0.0522775	0.0942288
AV320801	expressed sequence AV320801	0	0	0
AW011738	expressed sequence AW011738	1.28388	0.470497	0.75383
AW046200	expressed sequence AW046200	0.408507	0.20911	0.42403
AW112010	expressed sequence AW112010	0	0	0
AW146154	expressed sequence AW146154	2.74283	3.60714	4.00472
AW209491	expressed sequence AW209491	11.905	15.7878	12.1555
AW495222	expressed sequence AW495222	0	0.0522775	0
AW549542	expressed sequence AW549542	0	0.365942	0.141343
AW549877	expressed sequence AW549877	54.3897	97.2884	109.447
AW551984	expressed sequence AW551984	25.8526	0.41822	0
AW554918	expressed sequence AW554918	16.2235	12.0238	11.6844
AW822252	expressed sequence AW822252	0	0	0
AY074887	cDNA sequence AY074887	0	0.156832	0.235572
AY358078	cDNA sequence AY358078	0	0.41822	0
AY512915	cDNA sequence AY512915	0	0	0
AY512931	cDNA sequence AY512931	0.233432	0.104555	0.471144
AY761184	cDNA sequence AY761184	0	0	0
AY761185	cDNA sequence AY761185	0	0	0
Aaas	achalasia, adrenocortical insufficiency, alacrimia	101.426	73.293	59.2699
Aacs	acetoacetyl-CoA synthetase	75.8071	86.8851	135.36
Aadac	arylacetamide deacetylase (esterase)	0	0	0
Aadacl2	arylacetamide deacetylase-like 2	0	0	0
Aadacl3	arylacetamide deacetylase-like 3	0	0	0
Aadat	aminoadipate aminotransferase	0.0583581	0	0
Aaed1	AhpC/TSA antioxidant enzyme domain containing 1	10.3294	8.93945	7.96233
Aagab	alpha- and gamma-adaptin binding protein	28.0119	31.837	30.6715
Aak1	AP2 associated kinase 1	188.205	178.057	155.713
Aamdc	adipogenesis associated Mth938 domain containing	4.20178	5.07091	1.60189
Aamp	angio-associated migratory protein	111.347	99.484	107.751
Aanat	arylalkylamine N-acetyltransferase	0.0583581	0	0
Aar2	AAR2 splicing factor homolog (S. cerevisiae)	33.089	27.3934	30.6244
Aard	alanine and arginine rich domain containing protein	0.0583581	0.20911	0
Aars	alanyl-tRNA synthetase	234.658	1224.55	366.032
Aars2	alanyl-tRNA synthetase 2, mitochondrial (putative)	13.7141	13.1216	17.6679
Aarsd1	alanyl-tRNA synthetase domain containing 1	25.7943	25.4591	32.4618
Aasdh	aminoadipate-semialdehyde dehydrogenase	8.05341	8.93945	12.6267
Aasdhppt	aminoadipate-semialdehyde dehydrogenase-phosphopantetheinyl transferase	28.7705	30.7391	26.8081
Aass	aminoadipate-semialdehyde synthase	0	0.20911	0
Aatf	apoptosis antagonizing transcription factor	44.9357	35.7055	56.4902
Aatk	apoptosis-associated tyrosine kinase	0.875371	0.20911	0
Abat	4-aminobutyrate aminotransferase	7.2364	9.35767	0.471144
Abca1	ATP-binding cassette, sub-family A (ABC1), member 1	7.76162	73.9203	41.3664
Abca12	ATP-binding cassette, sub-family A (ABC1), member 12	0	0.104555	0.0942288
Abca13	ATP-binding cassette, sub-family A (ABC1), member 13	0.29179	0.365942	0.471144
Abca14	ATP-binding cassette, sub-family A (ABC1), member 14	0	0.104555	0
Abca15	ATP-binding cassette, sub-family A (ABC1), member 15	0	0	0.0471144
Abca16	ATP-binding cassette, sub-family A (ABC1), member 16	0	0	0.0942288
Abca17	ATP-binding cassette, sub-family A (ABC1), member 17	0	0.0522775	0.0942288
Abca2	ATP-binding cassette, sub-family A (ABC1), member 2	23.9852	32.0461	75.8542
Abca3	ATP-binding cassette, sub-family A (ABC1), member 3	14.7646	43.9131	70.4831
Abca4	ATP-binding cassette, sub-family A (ABC1), member 4	0.29179	0.104555	0.942288
Abca5	ATP-binding cassette, sub-family A (ABC1), member 5	26.728	40.2014	95.6422
Abca6	ATP-binding cassette, sub-family A (ABC1), member 6	0	4.54814	0.0942288
Abca7	ATP-binding cassette, sub-family A (ABC1), member 7	36.0653	11.4488	60.8247
Abca8a	ATP-binding cassette, sub-family A (ABC1), member 8a	0	0.20911	0
Abca8b	ATP-binding cassette, sub-family A (ABC1), member 8b	1.45895	15.8401	5.8893
Abca9	ATP-binding cassette, sub-family A (ABC1), member 9	1.22552	42.8675	0.282686
Abcb10	ATP-binding cassette, sub-family B (MDR/TAP), member 10	34.6063	48.1998	62.6622
Abcb11	ATP-binding cassette, sub-family B (MDR/TAP), member 11	0.29179	0.104555	0.0471144
Abcb1a	ATP-binding cassette, sub-family B (MDR/TAP), member 1A	0.875371	4.75725	0.188458
Abcb1b	ATP-binding cassette, sub-family B (MDR/TAP), member 1B	44.2938	63.4126	82.2146
Abcb4	ATP-binding cassette, sub-family B (MDR/TAP), member 4	0.175074	0.993272	0
Abcb5	ATP-binding cassette, sub-family B (MDR/TAP), member 5	0	0	0
Abcb6	ATP-binding cassette, sub-family B (MDR/TAP), member 6	11.4382	8.31212	5.65373
Abcb7	ATP-binding cassette, sub-family B (MDR/TAP), member 7	37.0574	33.1962	24.5466
Abcb8	ATP-binding cassette, sub-family B (MDR/TAP), member 8	10.5045	15.3696	25.96
Abcb9	ATP-binding cassette, sub-family B (MDR/TAP), member 9	0.758655	1.09783	0.141343
Abcc1	ATP-binding cassette, sub-family C (CFTR/MRP), member 1	226.721	222.231	349.306
Abcc10	ATP-binding cassette, sub-family C (CFTR/MRP), member 10	6.01088	7.00518	17.2439
Abcc12	ATP-binding cassette, sub-family C (CFTR/MRP), member 12	0	0.41822	0.0471144
Abcc2	ATP-binding cassette, sub-family C (CFTR/MRP), member 2	0	0	0.141343
Abcc3	ATP-binding cassette, sub-family C (CFTR/MRP), member 3	2.21761	0.156832	0.0471144
Abcc4	ATP-binding cassette, sub-family C (CFTR/MRP), member 4	41.4342	48.3567	18.5631
Abcc5	ATP-binding cassette, sub-family C (CFTR/MRP), member 5	90.5717	73.5544	149.447
Abcc6	ATP-binding cassette, sub-family C (CFTR/MRP), member 6	0.233432	0.104555	0
Abcc8	ATP-binding cassette, sub-family C (CFTR/MRP), member 8	0	0	0
Abcc9	ATP-binding cassette, sub-family C (CFTR/MRP), member 9	0.466865	0.261387	0.282686
Abcd1	ATP-binding cassette, sub-family D (ALD), member 1	22.1177	19.8132	9.89402
Abcd2	ATP-binding cassette, sub-family D (ALD), member 2	3.26805	5.43686	9.84691
Abcd3	ATP-binding cassette, sub-family D (ALD), member 3	92.7893	86.9374	72.2735
Abcd4	ATP-binding cassette, sub-family D (ALD), member 4	21.3591	10.1418	17.8564
Abce1	ATP-binding cassette, sub-family E (OABP), member 1	574.302	979.366	329.612
Abcf1	ATP-binding cassette, sub-family F (GCN20), member 1	159.318	145.175	156.702
Abcf2	ATP-binding cassette, sub-family F (GCN20), member 2	132.356	142.822	136.208
Abcf3	ATP-binding cassette, sub-family F (GCN20), member 3	60.8675	43.0244	54.3229
Abcg1	ATP-binding cassette, sub-family G (WHITE), member 1	1.63403	0.156832	0.0471144
Abcg2	ATP-binding cassette, sub-family G (WHITE), member 2	25.1523	46.9452	58.9401
Abcg3	ATP-binding cassette, sub-family G (WHITE), member 3	0	0	0.0471144
Abcg4	ATP-binding cassette, sub-family G (WHITE), member 4	0	0.261387	0.565373
Abcg5	ATP-binding cassette, sub-family G (WHITE), member 5	0	0.0522775	0
Abcg8	ATP-binding cassette, sub-family G (WHITE), member 8	0	0.0522775	0
Abhd1	abhydrolase domain containing 1	1.98417	0.731884	12.2026
Abhd10	abhydrolase domain containing 10	17.6825	9.93272	7.39696
Abhd11	abhydrolase domain containing 11	11.1464	20.4405	26.4783
Abhd11os	abhydrolase domain containing 11, opposite strand	0.0583581	0.0522775	0
Abhd12	abhydrolase domain containing 12	39.275	50.1341	42.5914
Abhd12b	abhydrolase domain containing 12B	0	0	0
Abhd13	abhydrolase domain containing 13	37.9911	52.6434	42.1203
Abhd14a	abhydrolase domain containing 14A	11.905	15.4219	5.84219
Abhd14b	abhydrolase domain containing 14b	13.2473	14.324	9.84691
Abhd15	abhydrolase domain containing 15	2.10089	1.35921	0.471144
Abhd16a	abhydrolase domain containing 16A	30.8131	28.3344	24.1697
Abhd16b	abhydrolase domain containing 16B	0.0583581	0.0522775	0.0471144
Abhd17a	abhydrolase domain containing 17A	44.0603	40.2536	47.4442
Abhd17b	abhydrolase domain containing 17B	30.638	31.9415	34.0637
Abhd17c	abhydrolase domain containing 17C	26.728	42.397	47.9625
Abhd2	abhydrolase domain containing 2	43.5351	56.6688	33.8753
Abhd3	abhydrolase domain containing 3	0.583581	0.522775	1.27209
Abhd4	abhydrolase domain containing 4	56.3155	51.8592	68.9755
Abhd5	abhydrolase domain containing 5	34.548	32.8825	30.5772
Abhd6	abhydrolase domain containing 6	6.65282	6.37785	6.07776
Abhd8	abhydrolase domain containing 8	73.0643	53.9503	46.0308
Abi1	abl-interactor 1	92.731	94.9882	133.899
Abi2	abl-interactor 2	69.4461	45.1155	62.8506
Abi3	ABI gene family, member 3	0.817013	2.30021	0.0942288
Abi3bp	ABI gene family, member 3 (NESH) binding protein	38.633	23.4203	0
Abl1	c-abl oncogene 1, non-receptor tyrosine kinase	182.836	175.182	230.013
Abl2	v-abl Abelson murine leukemia viral oncogene 2 (arg, Abelson-related gene)	144.553	113.233	141.861
Ablim1	actin-binding LIM protein 1	41.3175	54.2117	41.5549
Ablim2	actin-binding LIM protein 2	0	0	0
Ablim3	actin binding LIM protein family, member 3	0.233432	0.784162	0.188458
Abo	ABO blood group (transferase A, alpha 1-3-N-acetylgalactosaminyltransferase, transferase B, alpha 1-3-galactosyltransferase)	0.0583581	0	0
Abr	active BCR-related gene	76.5658	54.6822	62.0497
Abra	actin-binding Rho activating protein	0	0.104555	0
Abracl	ABRA C-terminal like	75.6904	64.0922	55.0767
Abt1	activator of basal transcription 1	30.1128	21.1201	20.7303
Abtb1	ankyrin repeat and BTB (POZ) domain containing 1	6.01088	5.85508	5.37104
Abtb2	ankyrin repeat and BTB (POZ) domain containing 2	19.6667	10.6646	21.2015
Acaa1a	acetyl-Coenzyme A acyltransferase 1A	30.6963	34.0326	26.2427
Acaa1b	acetyl-Coenzyme A acyltransferase 1B	0.466865	0.104555	0.75383
Acaa2	acetyl-Coenzyme A acyltransferase 2 (mitochondrial 3-oxoacyl-Coenzyme A thiolase)	32.3304	30.5823	25.0177
Acaca	acetyl-Coenzyme A carboxylase alpha	192.64	162.06	247.963
Acacb	acetyl-Coenzyme A carboxylase beta	2.68447	2.03882	6.17199
Acad10	acyl-Coenzyme A dehydrogenase family, member 10	0.641939	2.71843	8.10368
Acad11	acyl-Coenzyme A dehydrogenase family, member 11	15.8734	17.4607	17.0554
Acad12	acyl-Coenzyme A dehydrogenase family, member 12	1.16716	1.67288	1.69612
Acad8	acyl-Coenzyme A dehydrogenase family, member 8	24.3937	19.8654	13.7574
Acad9	acyl-Coenzyme A dehydrogenase family, member 9	56.9575	56.146	87.0203
Acadl	acyl-Coenzyme A dehydrogenase, long-chain	63.1434	61.5306	80.0474
Acadm	acyl-Coenzyme A dehydrogenase, medium chain	107.145	50.0818	45.5596
Acads	acyl-Coenzyme A dehydrogenase, short chain	32.9723	31.7847	43.8164
Acadsb	acyl-Coenzyme A dehydrogenase, short/branched chain	25.6192	98.2294	100.212
Acadvl	acyl-Coenzyme A dehydrogenase, very long chain	83.6271	66.1833	99.5527
Acan	aggrecan	0.116716	0	0
Acap1	ArfGAP with coiled-coil, ankyrin repeat and PH domains 1	0.466865	0.261387	0.376915
Acap2	ArfGAP with coiled-coil, ankyrin repeat and PH domains 2	173.265	121.231	212.392
Acap3	ArfGAP with coiled-coil, ankyrin repeat and PH domains 3	37.9911	34.3986	24.4524
Acat1	acetyl-Coenzyme A acetyltransferase 1	73.0059	85.16	111.991
Acat2	acetyl-Coenzyme A acetyltransferase 2	87.3037	41.1946	211.402
Acat3	acetyl-Coenzyme A acetyltransferase 3	0.29179	2.45704	1.60189
Acbd3	acyl-Coenzyme A binding domain containing 3	103.235	107.012	85.3713
Acbd4	acyl-Coenzyme A binding domain containing 4	6.82789	10.8214	16.9612
Acbd5	acyl-Coenzyme A binding domain containing 5	52.4055	65.9219	85.2771
Acbd6	acyl-Coenzyme A binding domain containing 6	31.1049	28.7003	29.8234
Acbd7	acyl-Coenzyme A binding domain containing 7	0	0	0
Accs	1-aminocyclopropane-1-carboxylate synthase (non-functional)	3.6182	7.94617	5.84219
Accsl	1-aminocyclopropane-1-carboxylate synthase (non-functional)-like	0	0.104555	0.282686
Acd	adrenocortical dysplasia	20.6004	58.3416	35.5243
Ace	angiotensin I converting enzyme (peptidyl-dipeptidase A) 1	0.233432	0.888717	0
Ace2	angiotensin I converting enzyme (peptidyl-dipeptidase A) 2	0	0	0
Ace3	angiotensin I converting enzyme (peptidyl-dipeptidase A) 3	0	0	0
Acer1	alkaline ceramidase 1	0	0.0522775	0.329801
Acer2	alkaline ceramidase 2	0.992087	0.940994	1.74323
Acer3	alkaline ceramidase 3	30.6963	19.8654	39.7646
Ache	acetylcholinesterase	0.0583581	0.156832	0.141343
Acin1	apoptotic chromatin condensation inducer 1	233.082	184.592	145.018
Ackr1	atypical chemokine receptor 1 (Duffy blood group)	0	0	0
Ackr2	atypical chemokine receptor 2	0.0583581	0	0
Ackr3	atypical chemokine receptor 3	7.70327	15.4741	161.555
Ackr4	atypical chemokine receptor 4	0.29179	0.20911	0.0471144
Acly	ATP citrate lyase	393.45	232.948	626.386
Acmsd	amino carboxymuconate semialdehyde decarboxylase	0.175074	0.104555	0.0942288
Acn9	NA	1.69238	1.82971	3.43935
Acnat1	acyl-coenzyme A amino acid N-acyltransferase 1	0.408507	0.20911	0.282686
Acnat2	acyl-coenzyme A amino acid N-acyltransferase 2	0	0	0
Aco1	aconitase 1	84.911	80.9255	64.4525
Aco2	aconitase 2, mitochondrial	278.251	304.778	225.537
Acot1	acyl-CoA thioesterase 1	3.6182	17.6698	54.6527
Acot10	acyl-CoA thioesterase 10	0.875371	0.731884	0.942288
Acot11	acyl-CoA thioesterase 11	0.350148	0.940994	0.471144
Acot12	acyl-CoA thioesterase 12	0	0	0
Acot13	acyl-CoA thioesterase 13	7.64491	13.5921	22.4265
Acot2	acyl-CoA thioesterase 2	10.271	32.6211	20.4005
Acot3	acyl-CoA thioesterase 3	0	0	0
Acot4	acyl-CoA thioesterase 4	0	0.679607	0
Acot5	acyl-CoA thioesterase 5	0	0	0
Acot6	acyl-CoA thioesterase 6	1.28388	1.35921	0
Acot7	acyl-CoA thioesterase 7	109.596	82.2325	72.085
Acot8	acyl-CoA thioesterase 8	5.77745	5.12319	5.18258
Acot9	acyl-CoA thioesterase 9	73.7062	59.8577	98.8931
Acox1	acyl-Coenzyme A oxidase 1, palmitoyl	75.3986	82.337	103.463
Acox2	acyl-Coenzyme A oxidase 2, branched chain	0	0	0.0471144
Acox3	acyl-Coenzyme A oxidase 3, pristanoyl	20.367	15.5787	22.8976
Acoxl	acyl-Coenzyme A oxidase-like	0.0583581	0.0522775	0.0471144
Acp1	acid phosphatase 1, soluble	85.8447	77.9457	112.556
Acp2	acid phosphatase 2, lysosomal	59.7003	52.4866	57.1027
Acp5	acid phosphatase 5, tartrate resistant	0.233432	0	0
Acp6	acid phosphatase 6, lysophosphatidic	5.36894	9.61905	11.8728
Acpp	acid phosphatase, prostate	0.116716	0.365942	0.0942288
Acpt	acid phosphatase, testicular	0	0	0
Acr	acrosin prepropeptide	0	0	0
Acrbp	proacrosin binding protein	1.05045	0.679607	1.22497
Acrv1	acrosomal vesicle protein 1	0	0	0
Acsbg1	acyl-CoA synthetase bubblegum family member 1	3.09298	0.156832	1.03652
Acsbg2	acyl-CoA synthetase bubblegum family member 2	0	0	0.0471144
Acsf2	acyl-CoA synthetase family member 2	38.633	16.1537	23.1803
Acsf3	acyl-CoA synthetase family member 3	9.57072	12.7034	19.364
Acsl1	acyl-CoA synthetase long-chain family member 1	24.2186	29.3799	42.026
Acsl3	acyl-CoA synthetase long-chain family member 3	70.0297	61.6351	104.311
Acsl4	acyl-CoA synthetase long-chain family member 4	77.2077	172.62	254.324
Acsl5	acyl-CoA synthetase long-chain family member 5	81.7597	97.968	105.489
Acsl6	acyl-CoA synthetase long-chain family member 6	0.175074	0.731884	10.4594
Acsm1	acyl-CoA synthetase medium-chain family member 1	0	0	0
Acsm2	acyl-CoA synthetase medium-chain family member 2	0	0	0
Acsm3	acyl-CoA synthetase medium-chain family member 3	0.0583581	0.0522775	0.141343
Acsm4	acyl-CoA synthetase medium-chain family member 4	0	0	0
Acsm5	acyl-CoA synthetase medium-chain family member 5	0	0	0
Acss1	acyl-CoA synthetase short-chain family member 1	0	0	0.0471144
Acss2	acyl-CoA synthetase short-chain family member 2	19.7834	5.95963	25.3004
Acss2os	acyl-CoA synthetase short-chain family member 2, opposite strand	0	0	0
Acss3	acyl-CoA synthetase short-chain family member 3	0	3.29348	0
Acta1	actin, alpha 1, skeletal muscle	5.07715	4.96636	0.659602
Acta2	actin, alpha 2, smooth muscle, aorta	1461.87	3971.31	248.152
Actb	actin, beta	4234.05	4883.97	3591.91
Actbl2	actin, beta-like 2	0	0	0
Actc1	actin, alpha, cardiac muscle 1	0.0583581	0.0522775	0
Actg1	actin, gamma, cytoplasmic 1	6054.18	5893.34	4554.36
Actg2	actin, gamma 2, smooth muscle, enteric	14.3561	218.938	0.706716
Actl10	actin-like 10	0.29179	0.41822	0.42403
Actl11	actin-like 11	0	0	0.0471144
Actl6a	actin-like 6A	63.4352	47.9384	46.3135
Actl6b	actin-like 6B	0	0	0
Actl7a	actin-like 7a	0	0	0.0471144
Actl7b	actin-like 7b	0	0	0.0471144
Actl9	actin-like 9	0.0583581	0.0522775	0
Actn1	actinin, alpha 1	1034.34	962.01	713.076
Actn2	actinin alpha 2	0	0	0
Actn3	actinin alpha 3	1.34224	0.62733	0.518258
Actn4	actinin alpha 4	672.694	773.027	566.409
Actr10	ARP10 actin-related protein 10	98.0999	84.3235	112.415
Actr1a	ARP1 actin-related protein 1A, centractin alpha	178.401	183.233	200.048
Actr1b	ARP1 actin-related protein 1B, centractin beta	105.103	92.8971	118.634
Actr2	ARP2 actin-related protein 2	325.813	388.631	328.387
Actr3	ARP3 actin-related protein 3	435.41	538.51	326.785
Actr3b	ARP3 actin-related protein 3B	1.1088	2.24793	0.329801
Actr5	ARP5 actin-related protein 5	10.7379	7.63251	9.94114
Actr6	ARP6 actin-related protein 6	9.39565	9.67133	7.11427
Actr8	ARP8 actin-related protein 8	26.1444	29.1708	21.013
Actrt1	actin-related protein T1	0	0	0
Actrt2	actin-related protein T2	0	0	0
Actrt3	actin related protein T3	0	0	0
Acvr1	activin A receptor, type 1	78.0831	69.9995	41.3193
Acvr1b	activin A receptor, type 1B	11.2047	10.0896	17.8092
Acvr1c	activin A receptor, type IC	0.0583581	0	0
Acvr2a	activin receptor IIA	32.914	68.6926	24.9235
Acvr2b	activin receptor IIB	1.05045	0.365942	1.41343
Acvrl1	activin A receptor, type II-like 1	0.700297	0.575052	0.565373
Acy1	aminoacylase 1	10.3294	8.5735	11.7786
Acy3	aspartoacylase (aminoacylase) 3	2.85955	1.82971	4.71144
Acyp1	acylphosphatase 1, erythrocyte (common) type	6.30267	4.02536	7.8681
Acyp2	acylphosphatase 2, muscle type	4.90208	3.29348	3.76915
Ada	adenosine deaminase	14.4144	8.20756	4.33452
Adad1	adenosine deaminase domain containing 1 (testis specific)	0	0	0
Adad2	adenosine deaminase domain containing 2	0	0	0
[truncated: 22,055 more rows]
